# Supplementary material for: Major Determinants of Airway Epithelial Cell Sensitivity to S. aureus Alpha-Toxin: Disposal of Toxin Heptamers by Extracellular Vesicle Formation and Lysosomal Degradation
Source: MDPI journal article supplement (doi:10.3390/toxins13030173), 2021-02-24
Supplement: s1 [file s1]

# Major Determinants of Airway Epithelial Cell Sensitivity to *S. aureus* Alpha-Toxin: Disposal of Toxin Heptamers by Extracellular Vesicle Formation and Lysosomal Degradation

Nils Möller, Sabine Ziese, Christian Hentschker, Uwe Völker and Jan-Peter Hildebrandt

**Table S2.** Comparisons of exosome marker proteins detected by mass spectrometry in supernatants of rHla-treated or serum-starved S9 cells. Extracellular vesicles were purified from cell culture media of S9 cells cultured in a serum-free growth medium and treated with 2000 ng/ml rHla (treated with rHla) or from culture medium of S9 cells that had been serum-starved for 8 h (8 h in starvation medium) or 48 h (48 h in starvation medium). Vesicle fractions were prepared by differential centrifugation, pelleted by ultracentrifugation, and analyzed by electrospray ionization (ESI) mass spectrometry. Protein sequences were checked against the Uniprot protein database (04/2019) also including the *S. aureus* rHla sequence. Median normalized Hi3 peptide intensities of the detected proteins were compared between the different treatments and the expression differences were presented as signal log2 ratio. Shown are proteins, which were identified as marker proteins for exosomes [1,2] and found in all three treatments ( $n = 3$ ). The signal log2-ratios are presented as:  $\geq 4 = ++$  ( $\geq 16$ -fold increased),  $\geq 2 = +$  ( $\geq 4$ -fold increased),  $\geq 1 = +$  ( $\geq 2$ -fold increased), 0 (same or little increased or decreased expression),  $\leq -1 = -$  ( $\leq 1/2$  of the comparison value),  $\leq -2 = --$  ( $\leq 1/4$  of the comparison value),  $\leq -4 = ---$  ( $\leq 1/16$  of the comparison value) (The respective values of the signal log2-ratios and the significant differences are shown in Table S3).

| Category                                                   | SwissProt # | Protein Description                                       | Signal log2 Ratio                            |                                               |                                               |
|------------------------------------------------------------|-------------|-----------------------------------------------------------|----------------------------------------------|-----------------------------------------------|-----------------------------------------------|
|                                                            |             |                                                           | Treated with rHla / 8 h in Starvation Medium | Treated with rHla / 48 h in Starvation Medium | Starvation Medium / 48 h in Starvation Medium |
| endosomal sorting complexes required for transport (ESCRT) | Q99816      | Tumor susceptibility gene 101 protein, TSG101             | +                                            | -                                             | --                                            |
|                                                            | Q9H9H4      | Vacuolar protein sorting-associated protein 37B, VPS37B   | +                                            | -                                             | --                                            |
|                                                            | O43633      | Charged multivesicular body protein 2a, CHMP2A            | 0                                            | --                                            | --                                            |
| ESCRT-associated                                           | Q8WUM4      | Programmed cell death 6 interacting protein, PDCD6IP/Alix | +                                            | 0                                             | --                                            |
| Tetraspanin                                                | P21926      | CD9 antigen, CD9                                          | -                                            | ---                                           | --                                            |
|                                                            | P27701      | CD82 antigen, CD82                                        | 0                                            | --                                            | --                                            |
|                                                            | P48509      | CD151 antigen, CD151                                      | 0                                            | --                                            | --                                            |
| RNA binding protein, ribosomal protein                     | P26373      | 60S ribosomal protein L13, RPL13                          | 0                                            | --                                            | --                                            |
|                                                            | P62851      | 40S ribosomal protein S25, RPS25                          | 0                                            | --                                            | --                                            |
| cargo selection                                            | Q96PU5      | E3 ubiquitin-protein ligase NEDD4-like, NEDD4L            | +                                            | -                                             | --                                            |
|                                                            | O00560      | Syntenin-1, Syndecan-binding protein 1, SDCBP             | +                                            | --                                            | --                                            |

|                                      |        |                                                                          |       |    |     |
|--------------------------------------|--------|--------------------------------------------------------------------------|-------|----|-----|
| protein trafficking, protein sorting | Q8N5I2 | Arrestin domain-containing protein 1, ARDC1                              | 0     | -- | --  |
|                                      | Q9H0U4 | Ras-related protein Rab-1B, Rab1B                                        | +++   | +  | --  |
|                                      | P20339 | Ras-related protein Rab-5A, Rab5A                                        | ++    | +  | -   |
|                                      | P61020 | Ras-related protein Rab-5B, Rab5B                                        | + + + | ++ | --  |
|                                      | P61006 | Ras-related protein Rab-8A, Rab8A                                        | ++    | 0  | --  |
| integral membrane protein            | Q15907 | Ras-related protein Rab-11B, Rab11B                                      | ++    | 0  | --  |
|                                      | P06756 | Integrin alpha-V, ITGAV                                                  | 0     | -- | --  |
|                                      | O14672 | A disintegrin and metalloproteinase domain-containing protein 10, ADAM10 | +     | -- | --  |
| GPI-anchor                           | Q969P0 | Immunoglobulin superfamily member 8, IGSF8                               | +     | -  | --  |
|                                      | P35052 | Glypican-1, GPC1                                                         | +     | 0  | --  |
| scaffold-ing protein                 | O75955 | Flotillin-1, FLOT1                                                       | +     | -  | --  |
|                                      | P11142 | Heat shock 70 kDa protein 8, HSPA8                                       | ++    | -  | --- |

1. Xu, R.; Greening, D.W.; Zhu, H.J.; Takahashi, N.; Simpson, R.J. Extracellular vesicle isolation and characterization: toward clinical application. *J. Clin. Invest.* **2016**, *126*, 1152–1162. doi:10.1172/JCI81129.
2. Théry, C.; Witwer, K.W.; Aikawa, E.; Alcaraz, M.J.; Anderson, J.D.; Andriantsitohaina, R.; Antoniou, A.; Arab, T.; Archer, F.; Atkin-Smith, G.K.; et al. Minimal information for studies of extracellular vesicles 2018 (MISEV2018): a position statement of the International Society for Extracellular Vesicles and update of the MISEV2014 guidelines. *J. Extracell. Vesicles* **2018**, *7*, 1535750. doi:10.1080/20013078.2018.1535750.

**Table S3.** Comparisons of micro-vesicle marker proteins detected by mass spectrometry in supernatants of rHla-treated or serum-starved S9 cells. Extracellular vesicles were purified from cell culture media of S9 cells cultured in a serum-free growth medium and treated with 2000 ng/ml rHla (treated with rHla) or from culture medium of S9 cells that had been serum-starved for 8 h (8 h in starvation medium) or 48 h (48 h in starvation medium). Vesicle fractions were prepared by differential centrifugation, pelleted by ultracentrifugation, and analyzed by electrospray ionization (ESI) mass spectrometry. Protein sequences were checked against the Uniprot protein database (04/2019) also including the *S. aureus* rHla sequence. Median normalized Hi3 peptide intensities of the detected proteins were compared between the different treatments and the expression differences were presented as signal log2 ratio. Shown are proteins, which were identified as marker proteins for micro-vesicles [1,2] and found in all three treatments ( $n = 3$ ). The signal log2-ratios are presented as:  $\geq 4 = ++$  ( $\geq 16$ -fold increased),  $\geq 2 = ++$  ( $\geq 4$ -fold increased),  $\geq 1 = +$  ( $\geq 2$ -fold increased), 0 (same or little increased or decreased expression),  $\leq -1 = -$  ( $\leq 1/2$  of the comparison value),  $\leq -2 = --$  ( $\leq 1/4$  of the comparison value),  $\leq -4 = ---$  ( $\leq 1/16$  of the comparison value) (The respective values of the signal log2-ratios and the significant differences are shown in Table S3).

| Category                                       | SwissProt # | Protein Description                                        | Signal log2 Ratio                            |                                               |                                                      |
|------------------------------------------------|-------------|------------------------------------------------------------|----------------------------------------------|-----------------------------------------------|------------------------------------------------------|
|                                                |             |                                                            | Treated with rHla / 8 h in Starvation Medium | Treated with rHla / 48 h in Starvation Medium | 8 h in Starvation Medium / 48 h in Starvation Medium |
| ribonuclear protein                            | P31943      | Heterogeneous nuclear ribonucleoprotein H, HNRNPH1         | ++                                           | 0                                             | --                                                   |
|                                                | P14866      | Heterogeneous nuclear ribonucleoprotein L, HNRNPL          | ++                                           | -                                             | --                                                   |
| calcium-binding chaperone                      | P27797      | Calreticulin, CALR                                         | +                                            | --                                            | --                                                   |
| nuclear export receptor                        | P55060      | Exportin-2, CSEIL                                          | ++                                           | -                                             | ---                                                  |
| calcium-dependent phospholipid binding protein | O75131      | Copine-3, CPNE3 protein, CPNE3                             | 0                                            | --                                            | --                                                   |
| mitochondrial outer membrane protein           | P21796      | Voltage-dependent anion-selective channel protein 1, VDAC1 | +                                            | 0                                             | --                                                   |
|                                                | P45880      | Voltage-dependent anion-selective channel protein 2, VDAC2 | ++                                           | 0                                             | --                                                   |

|                                                                     |        |                                                                        |     |    |     |
|---------------------------------------------------------------------|--------|------------------------------------------------------------------------|-----|----|-----|
| mitochondrial and nuclear protein                                   | Q99623 | Prohibitin-2, PHB2                                                     | 0   | -- | --  |
| mitochondrial inner membrane protein                                | Q00325 | Solute carrier family 25 member 3, SLC25A3                             | ++  | 0  | --  |
|                                                                     | P25705 | ATP synthase subunit alpha, mitochondrial, ATP5A1                      | +++ | ++ | --  |
| ABC transporter                                                     | P61221 | ATP-binding cassette sub-family E member 1, ABCE1                      | +++ | 0  | --- |
| integral membrane protein                                           | Q07065 | Cytoskeleton-associated protein 4, CKAP4                               | +   | -  | --  |
| cytoskeleton/microtubule regulation, cell motility                  | Q9UM54 | Unconventional myosin-VI, MYO6                                         | ++  | 0  | --- |
|                                                                     | O75369 | Filamin-B, FLNB                                                        | ++  | -  | --  |
|                                                                     | Q9H0H5 | Rac GTPase-activating protein 1, RACGAP1                               | +   | -- | --  |
|                                                                     | Q02241 | Kinesin-like protein, KIF23                                            | 0   | -- | --  |
|                                                                     | P06753 | Tropomyosin alpha-3 chain, TPM3                                        | ++  | 0  | --  |
| cytosolic enzyme                                                    | P49588 | Alanine--tRNA ligase, cytoplasmic, AARS                                | ++  | 0  | --  |
|                                                                     | P31939 | Bifunctional purine biosynthesis protein,ATIC                          | +++ | +  | --- |
| enzyme, organizer of 3D structure of proteins                       | Q96HE7 | ERO1-like protein alpha, ERO1L                                         | ++  | -  | --  |
|                                                                     | P13667 | Protein disulfide-isomerase A4, PDIA4                                  | 0   | -- | --  |
| membrane-associated protein, beta-subunit of heterotrimeric protein | P62879 | Guanine nucleotide-binding protein G(I)/G(S)/G(T) subunit beta-2, GNB2 | ++  | 0  | --  |

1. Xu, R.; Greening, D.W.; Zhu, H.J.; Takahashi, N.; Simpson, R.J. Extracellular vesicle isolation and characterization: toward clinical application. *J. Clin. Invest.* **2016**, *126*, 1152–1162. doi:10.1172/JCI81129.
2. Théry, C.; Witwer, K.W.; Aikawa, E.; Alcaraz, M.J.; Anderson, J.D.; Andriantsitohaina, R.; Antoniou, A.; Arab, T.; Archer, F.; Atkin-Smith, G.K.; et al. Minimal information for studies of extracellular vesicles 2018 (MISEV2018): a position statement of the International Society for Extracellular Vesicles and update of the MISEV2014 guidelines. *J. Extracell. Vesicles* **2018**, *7*, 1535750. doi:10.1080/20013078.2018.1535750.
