# Supplementary material for: Major Determinants of Airway Epithelial Cell Sensitivity to S. aureus Alpha-Toxin: Disposal of Toxin Heptamers by Extracellular Vesicle Formation and Lysosomal Degradation
Source: Toxins (Basel). 2021 Feb 24;13(3):173. doi: 10.3390/toxins13030173 (PMC7996177; doi:10.3390/toxins13030173)
Supplement: Supplementary file 1 [file toxins-13-00173-s001.zip › toxins-1111098 suppl_Tab S1_revised.xlsx]

## Sheet: all found prot. and comparisons
S1: Extracellular vesicles were purified from cell culture media of S9 cells cultured in a serum-free growth medium and treated with 2,000 ng/ml rHla (treated with rHla) or from culture medium of S9 cells that had been serum-starved for 8 h (8 h in starvation medium) or 48 h (48 h ion starvation medium). Vesicle fractions were prepared by differential centrifugation, pelleted by ultracentrifugati…
	Presence of the detected proteins in the individual samples (binary)
					Number of peptides found from each detected proteins						Comparisons proteins found in pelleted vesicle material of S9 cell supernatants													Additionally, the p.fdr (FalseDiscovery Rate p-value), an adjusted p-value, is listed (significant differences: p.fdr. ≤ 0.05
PG.ProteinGroups	90_min rHla	8h starvation	48h starvation		90_min rHla	8h starvation	48h starvation				PG.ProteinGroups	90_min/8h|signal_log2_ratio	90_min/8h|raw_p_value	90_min/8h|adjusted_p_value		90_min/48h|signal_log2_ratio	90_min/48h|raw_p_value	90_min/48h|adjusted_p_value		8h/48h|signal_log2_ratio	8h/48h|raw_p_value	8h/48h|adjusted_p_value
A0A024RBG1;Q9NZJ9	1	0	0		2	0	0				A0A024RBG1;Q9NZJ9	10.4908	1.01707e-09	4.77685e-09		2.96556	5.44767e-05	0.000137494		-7.52528	1.46659e-08	3.81368e-08
A0A0B4J2D5;P0DPI2	0	1	1		0	2	2				A0A0B4J2D5;P0DPI2	3.80362	1.38082e-05	3.39355e-05		1.89531	7.4355e-06	2.21132e-05		-1.90831	0.000406374	0.000560192
A0AVT1	1	1	1		9	11	15				A0AVT1	4.51171	3.87507e-23	7.09396e-22		1.25696	3.07055e-10	1.89904e-09		-3.7635	2.06381e-22	2.20801e-21
A0FGR8	1	1	1		3	5	9				A0FGR8	2.76189	1.16678e-05	2.90743e-05		-1.62564	0.000495326	0.0010139		-4.38753	3.51435e-12	1.39996e-11
A0MZ66	1	1	1		4	4	6				A0MZ66	2.95474	0.0172792	0.0245171		-2.95685	1.4624e-05	4.15418e-05		-5.17131	2.93323e-11	1.04515e-10
A2A3N6	1	1	1		3	2	3				A2A3N6	2.18834	8.01311e-06	2.05261e-05		-0.422388	0.478227	0.537614		-3.10265	0.00736209	0.00873149
A4D1P6	1	0	0		2	0	0				A4D1P6	7.25283	4.58778e-06	1.22549e-05		5.48352	6.44021e-06	1.94624e-05		-1.76931	0.000681541	0.000911746
A5A3E0	1	1	1		2	2	2				A5A3E0	4.26905	1.2172e-06	3.57098e-06		0.485794	0.0622336	0.0827972		-3.78326	2.7324e-06	5.17076e-06
A5D8V6	0	0	1		0	0	2				A5D8V6	0.410081	0.685383	0.734225		-3.13476	0.00013149	0.000305993		-3.54484	0.00017359	0.000253014
A5YKK6	1	1	1		22	11	22				A5YKK6	3.67926	6.3707e-31	2.06621e-29		-0.475654	4.27746e-06	1.34701e-05		-4.27259	1.91056e-35	5.66159e-34
A6NEY8	1	0	0		2	0	0				A6NEY8	13.5355	8.17382e-10	3.91944e-09		9.1025	0.00143417	0.00264785		-4.43299	0.0746748	0.0814365
A6NHR9	1	1	1		6	6	17				A6NHR9	2.17338	3.28671e-09	1.42505e-08		-1.96261	1.97645e-17	3.18008e-16		-4.87962	7.4899e-26	1.04226e-24
A6NHX0	1	0	1		4	0	3				A6NHX0	8.13686	8.34164e-10	3.98599e-09		3.51093	9.13569e-07	3.24116e-06		-4.24741	4.86489e-05	7.716e-05
A6NIH7	0	0	1		0	0	2				A6NIH7	2.90186	0.00108157	0.00189493		-1.95748	0.083003	0.107546		-4.85934	0.000705726	0.000940435
A8MWD9;P62308	1	1	1		3	3	3				A8MWD9;P62308	0.194053	0.77286	0.816678		-3.65481	1.60747e-08	7.54121e-08		-3.84887	7.95946e-08	1.86916e-07
E9PAV3	1	1	1		5	5	5				E9PAV3	1.51848	4.16964e-06	1.12107e-05		-1.60965	1.09129e-06	3.81582e-06		-2.77779	1.26458e-08	3.32195e-08
O00139	1	1	1		8	7	8				O00139	1.7487	1.4833e-06	4.29656e-06		-1.16767	1.47622e-05	4.18483e-05		-2.97292	6.04901e-12	2.32641e-11
O00148	1	1	1		11	9	11				O00148	2.66244	3.85311e-14	3.05211e-13		0.207006	0.705453	0.761868		-2.25068	4.39728e-12	1.73159e-11
O00151	1	1	1		4	5	7				O00151	2.32058	0.000308888	0.000591222		-2.12525	1.02335e-10	6.8207e-10		-3.43018	3.22364e-14	1.60171e-13
O00154	1	1	1		9	10	12				O00154	3.75095	3.63691e-23	6.68769e-22		0.585688	0.00514005	0.00845522		-3.52206	3.45308e-23	3.83376e-22
O00159	1	1	1		23	26	32				O00159	0.542448	0.000369243	0.000695114		-2.13118	3.97171e-35	2.47871e-33		-3.08038	9.57811e-43	4.87065e-41
O00161	1	1	1		6	11	11				O00161	-2.88792	1.03794e-06	3.08908e-06		-5.47674	1.6211e-14	1.79982e-13		-2.58882	1.39013e-14	7.21153e-14
O00170	0	1	1		0	2	4				O00170	0.693671	0.687892	0.736529		-2.68743	0.00294772	0.00511228		-3.54692	1.84872e-05	3.11957e-05
O00178	1	0	1		8	0	8				O00178	5.45915	5.56068e-13	3.74401e-12		0.427049	0.013634	0.0206086		-4.15042	4.16271e-12	1.64393e-11
O00186	1	1	1		7	9	11				O00186	0.923518	0.00202612	0.00337891		-2.22792	1.55999e-16	2.22339e-15		-3.16144	1.49737e-18	1.12961e-17
O00194	1	1	1		4	4	4				O00194	5.10533	5.32545e-07	1.65426e-06		1.21328	0.0128719	0.0195499		-2.70226	0.00051017	0.000692157
O00203	1	1	1		13	10	14				O00203	3.84464	7.70931e-22	1.24528e-20		-0.506496	0.0272117	0.0387569		-3.98265	1.32067e-26	1.93588e-25
O00231	1	1	1		25	18	25				O00231	3.75991	1.33993e-35	5.68989e-34		0.851899	1.00172e-10	6.68734e-10		-2.73977	2.03163e-27	3.194e-26
O00232	1	1	1		18	17	20				O00232	3.46725	4.85454e-32	1.70905e-30		0.645571	6.38556e-07	2.32146e-06		-3.11261	2.00852e-27	3.16977e-26
O00233	0	1	1		0	3	3				O00233	-0.569434	0.55968	0.612955		-5.22484	1.50239e-07	6.04921e-07		-4.47585	8.8503e-08	2.0619e-07
O00264	1	0	1		3	0	3				O00264	4.65711	4.49603e-08	1.66689e-07		1.58647	0.000536139	0.00108625		-3.19468	3.27285e-07	7.05436e-07
O00267	1	1	1		13	10	15				O00267	2.30647	5.78504e-18	6.75031e-17		-1.47398	1.78728e-07	7.12661e-07		-3.92999	3.14761e-25	4.18226e-24
O00299	1	1	1		6	7	7				O00299	1.18302	0.00197363	0.00329792		-1.86283	1.41901e-12	1.20513e-11		-4.00363	8.39763e-16	4.98413e-15
O00303	1	1	1		11	11	11				O00303	0.725514	4.11348e-05	9.18343e-05		-0.762478	6.44691e-05	0.000160162		-1.47309	2.38027e-07	5.23176e-07
O00308	0	0	1		0	0	2				O00308	3.63694	0.045561	0.0601493		-4.31115	0.000332327	0.000708151		-7.9481	0.000144575	0.000213519
O00330	1	0	0		3	0	0				O00330	6.81164	0.000173348	0.00034594		4.91629	0.00197348	0.00352444		-0.345538	0.978223	0.982516
O00339	1	1	1		13	17	19				O00339	-2.97435	8.00808e-15	6.91516e-14		-5.32378	8.43092e-40	6.80921e-38		-2.61813	5.30191e-25	6.95496e-24
O00391	1	1	1		19	20	21				O00391	-1.0154	1.01497e-05	2.54917e-05		-1.33161	1.38915e-11	1.03658e-10		0.0971514	0.999667	1
O00410	1	1	1		20	16	19				O00410	5.27717	8.33987e-38	3.99441e-36		1.91554	2.16287e-20	4.47681e-19		-3.50127	2.02799e-29	3.76274e-28
O00422	1	1	1		2	2	2				O00422	0.985159	0.055207	0.0720753		-1.01765	0.0250068	0.0359898		-2.00281	0.00380585	0.00465034
O00429	1	1	1		18	12	19				O00429	4.94956	6.88488e-34	2.65036e-32		1.02114	5.46045e-09	2.72956e-08		-3.90964	2.25514e-26	3.21416e-25
O00442	1	0	1		3	0	4				O00442	4.41015	3.9432e-06	1.06505e-05		1.476	0.000224842	0.000495254		-2.70153	0.000277178	0.000391662
O00443	1	1	1		5	7	12				O00443	1.69785	7.11995e-06	1.83869e-05		-2.43488	2.62082e-14	2.82596e-13		-3.88727	2.09034e-20	1.88818e-19
O00445	1	0	0		3	0	0				O00445	5.69326	2.51676e-07	8.26018e-07		6.16477	1.30314e-06	4.50305e-06		0.471504	0.763163	0.778279
O00461	0	1	1		0	4	4				O00461	-1.0398	0.877463	0.911543		-1.7848	0.270013	0.319961		-0.861773	0.0237058	0.0268033
O00462	1	0	1		4	0	5				O00462	6.47392	8.59734e-14	6.50964e-13		3.67839	1.7319e-08	8.06977e-08		-3.7764	1.01266e-07	2.33416e-07
O00468	1	1	1		26	29	28				O00468	-2.48912	1.11459e-34	4.54553e-33		-2.01491	4.89611e-36	3.25275e-34		0.45105	0.00839343	0.00988917
O00469	0	1	1		0	4	5				O00469	-0.436096	0.159534	0.191972		-4.16304	2.06182e-11	1.50312e-10		-2.62304	8.64548e-09	2.30341e-08
O00471	1	0	1		5	0	6				O00471	4.06293	1.92925e-11	1.1161e-10		-0.492408	0.0496635	0.0670042		-4.95476	7.87115e-13	3.31845e-12
O00487	1	1	1		5	5	5				O00487	2.84632	2.13601e-08	8.26126e-08		0.175742	0.754517	0.809127		-2.41807	2.58372e-09	7.29928e-09
O00499	1	1	1		2	3	3				O00499	2.39749	0.0061093	0.00936168		-0.842895	0.0173821	0.0257821		-2.68514	8.98046e-06	1.58826e-05
O00505	1	0	1		2	0	2				O00505	2.30712	0.00297014	0.00481653		-0.21908	0.689784	0.7471		-2.5262	0.000461835	0.000631573
O00534	1	0	0		3	0	0				O00534	6.34715	2.39674e-08	9.20912e-08		3.4428	4.15081e-07	1.54913e-06		-2.18726	0.00420638	0.00511848
O00541	0	1	1		0	3	3				O00541	1.40773	0.0668871	0.0859083		-1.52627	0.0193995	0.028477		-1.89301	0.000159407	0.000233665
O00560	1	1	1		10	10	10				O00560	1.20432	0.00236126	0.00389353		-2.84929	1.73853e-17	2.83044e-16		-3.74067	1.30463e-16	8.26737e-16
O00567	1	1	1		9	14	19				O00567	1.11386	2.08115e-07	6.95237e-07		-2.49132	3.57088e-23	9.13569e-22		-4.3671	5.85803e-25	7.66007e-24
O00571	1	1	1		17	12	18				O00571	2.06177	3.16527e-17	3.46749e-16		-1.8645	1.02873e-17	1.71552e-16		-3.85342	1.12184e-27	1.80503e-26
O00622	1	1	1		5	3	5				O00622	4.91549	3.89751e-10	1.93653e-09		-2.4849	2.6969e-09	1.43336e-08		-6.94868	2.12622e-13	9.72019e-13
O00629	1	1	1		3	2	3				O00629	2.53693	0.00017744	0.000353251		-0.635855	0.0201906	0.0295751		-3.3375	1.65875e-05	2.81981e-05
O00712	1	0	1		2	0	2				O00712	3.03676	0.000114721	0.000235796		-0.101451	0.808103	0.857439		-3.13821	0.000248681	0.000353701
O00743	1	1	1		5	2	5				O00743	4.85733	1.39214e-11	8.12212e-11		0.0671612	0.962022	0.994096		-4.88587	2.19124e-10	7.04033e-10
O00762	0	0	1		0	0	5				O00762	0.663367	0.00722804	0.0109537		-2.52695	2.17985e-05	5.99438e-05		-3.71354	9.49453e-10	2.85668e-09
O00764	1	1	1		6	5	8				O00764	1.92838	0.00394008	0.006242		-3.27347	5.97847e-14	6.05044e-13		-4.65376	8.13975e-11	2.76859e-10
O14497	1	1	1		3	2	5				O14497	3.20547	0.000101863	0.000210947		-1.11432	0.0134534	0.020358		-5.66658	1.48152e-08	3.85008e-08
O14558	1	0	0		2	0	0				O14558	9.09952	1.58747e-07	5.39948e-07		4.35959	2.47815e-06	8.13347e-06		-4.73993	5.94922e-05	9.33163e-05
O14576	1	0	0		4	0	0				O14576	5.88901	4.82432e-07	1.51343e-06		5.18723	1.26186e-07	5.09072e-07		-1.89186	0.257843	0.272253
O14578	0	1	1		0	11	21				O14578	1.78973	3.07505e-08	1.16738e-07		-3.15459	2.22145e-17	3.54657e-16		-4.656	9.13805e-33	2.33786e-31
O14579	1	1	1		6	6	8				O14579	1.47668	5.76396e-05	0.000125088		-1.0524	1.9902e-05	5.52402e-05		-3.47453	4.90144e-15	2.69547e-14
O14602;P47813	1	1	1		6	6	6				O14602;P47813	2.00582	2.62542e-09	1.15535e-08		0.240066	0.336042	0.391226		-2.26603	7.96671e-09	2.12945e-08
O14617	1	1	1		10	4	16				O14617	3.9219	4.97104e-19	6.30022e-18		-0.0498562	1	1		-4.41022	2.03327e-17	1.36624e-16
O14657	1	1	1		5	5	8				O14657	0.657254	0.0426726	0.0565353		-3.05331	1.11416e-07	4.53479e-07		-2.94014	1.24547e-13	5.83627e-13
O14672	1	1	1		7	5	7				O14672	1.38987	1.84436e-06	5.22845e-06		-1.97475	6.95114e-12	5.39204e-11		-2.76387	1.8236e-13	8.402e-13
O14683	1	0	0		2	0	0				O14683	3.2408	0.000691003	0.0012511		5.89067	1.76221e-06	5.96429e-06		2.64987	6.95575e-05	0.000108116
O14727	0	0	1		0	0	3				O14727	2.0189	0.0277489	0.0379348		-2.47021	0.102538	0.130801		-4.48911	0.00452826	0.00548772
O14737	1	1	1		2	2	3				O14737	0.377617	0.610294	0.662747		-1.86279	4.38028e-05	0.000112859		-2.63914	8.04351e-07	1.64341e-06
O14744	1	1	1		8	6	10				O14744	3.41966	4.62906e-15	4.10045e-14		-0.0847568	0.992461	1		-3.62824	1.09868e-19	9.21687e-19
O14745	1	1	1		3	5	5				O14745	-0.406115	0.348432	0.396681		-2.84313	8.43439e-07	3.0079e-06		-2.71924	4.98899e-10	1.55209e-09
O14763	1	0	1		2	0	2				O14763	2.9682	0.0874736	0.109648		-1.78264	0.00145492	0.00268014		-4.75084	0.00042895	0.000588751
O14772	1	0	0		2	0	0				O14772	3.57676	0.00113933	0.00198599		0.132093	0.195811	0.23827		-3.44466	0.00671396	0.00798579
O14773	1	1	1		6	4	6				O14773	1.61867	2.70554e-05	6.28902e-05		-1.86783	1.02269e-06	3.60348e-06		-3.4865	3.38335e-13	1.4985e-12
O14776	1	1	1		6	3	7				O14776	4.93012	2.99806e-07	9.71213e-07		-1.35259	2.28428e-07	8.96943e-07		-6.28272	2.11186e-10	6.80122e-10
O14777	0	0	1		0	0	2				O14777	4.87841	2.11885e-07	7.0611e-07		-0.300156	0.0493074	0.0665456		-5.17856	0.0120858	0.0140032
O14786	1	1	1		11	14	14				O14786	-0.844808	0.0190603	0.0268225		-3.08195	1.13588e-20	2.42419e-19		-2.31369	1.47575e-18	1.11534e-17
O14787	1	0	1		4	0	4				O14787	5.28883	2.22668e-08	8.58774e-08		1.48223	3.43697e-05	9.0575e-05		-3.58306	2.2699e-05	3.8038e-05
O14817	0	0	1		0	0	2				O14817	-1.35741	0.071878	0.0916895		-6.13273	7.99271e-09	3.93804e-08		-4.77532	5.96913e-05	9.35929e-05
O14818	1	1	1		9	8	9				O14818	2.91704	4.31129e-15	3.86048e-14		-0.390166	0.0364022	0.0503156		-3.41494	5.67738e-17	3.70018e-16
O14828	1	1	1		3	5	6				O14828	0.593605	0.113306	0.139608		-1.9176	1.14815e-07	4.66852e-07		-2.31848	5.47697e-09	1.49204e-08
O14841	1	0	1		4	0	2				O14841	3.45176	3.12321e-08	1.18458e-07		3.51232	6.0712e-05	0.000151376		-1.05783	0.712061	0.728658
O14879	0	1	1		0	9	12				O14879	-1.81756	5.56866e-05	0.000121297		-4.60016	2.44897e-17	3.87974e-16		-2.67971	1.62229e-17	1.10086e-16
O14907	0	1	1		0	2	2				O14907	0.332872	0.59485	0.647341		-2.33237	1.00092e-05	2.91984e-05		-2.66524	2.19586e-05	3.68272e-05
O14908	0	1	1		0	6	6				O14908	0.969001	0.00789177	0.0118809		-1.95578	4.5143e-06	1.4138e-05		-2.17554	9.43565e-10	2.84104e-09
O14929	1	1	1		3	3	5				O14929	1.46986	9.96072e-05	0.000206691		-1.1718	0.000189219	0.000423124		-2.67128	1.27121e-10	4.23632e-10
O14936	1	1	1		5	4	5				O14936	3.58738	0.00111376	0.00194554		0.192529	0.391103	0.448359		-2.9851	0.00569878	0.0068157
O14950;P19105	1	1	1		8	8	9				O14950;P19105	0.210599	0.865865	0.900858		-2.51577	5.6761e-16	7.39869e-15		-2.72637	1.88412e-14	9.66464e-14
O14964	1	1	1		7	4	7				O14964	3.86031	2.026e-10	1.04183e-09		0.366173	0.17643	0.216349		-3.79926	8.66245e-13	3.63347e-12
O14965	0	0	1		0	0	3				O14965	0.83328	0.554581	0.608016		-3.56577	0.000167189	0.000378379		-4.70329	3.82533e-05	6.15971e-05
O14974	0	0	1		0	0	4				O14974	2.18171	0.000491814	0.000910873		-1.88309	1.76923e-06	5.98315e-06		-5.16885	2.45869e-08	6.20929e-08
O14976	1	0	1		3	0	8				O14976	4.31927	1.49246e-10	7.81121e-10		-0.273937	0.771345	0.824596		-4.31151	1.1027e-13	5.20275e-13
O14979	1	0	1		2	0	2				O14979	7.85602	9.48292e-10	4.49658e-09		-0.239579	0.482262	0.541854		-8.0956	2.76951e-09	7.78676e-09
O14980	1	1	1		27	17	29				O14980	4.12288	2.35605e-45	2.20558e-43		-0.747584	2.02477e-10	1.29503e-09		-4.95344	5.05143e-54	4.52323e-52
O15027	1	1	1		3	6	7				O15027	-0.908777	0.0616141	0.0797075		-2.97993	7.37893e-12	5.70241e-11		-2.17659	2.70699e-08	6.81963e-08
O15031	1	1	1		19	19	22				O15031	0.950685	6.45137e-05	0.000138043		-1.61162	6.5874e-22	1.53297e-20		-2.68643	1.03296e-26	1.53601e-25
O15042	0	1	1		0	5	9				O15042	3.49984	0.000167129	0.000334339		-3.00197	6.49265e-06	1.95921e-05		-4.42886	2.26848e-18	1.68055e-17
O15066	1	1	1		7	4	7				O15066	4.81666	2.75808e-13	1.92878e-12		1.69311	1.08908e-06	3.8113e-06		-3.26054	7.99696e-11	2.72452e-10
O15067	1	1	1		6	8	14				O15067	1.96184	3.89312e-09	1.66174e-08		-1.84331	2.50551e-05	6.78513e-05		-4.1917	7.72777e-25	9.94709e-24
O15075	1	0	0		9	0	0				O15075	4.83822	4.16164e-16	4.06204e-15		4.20432	9.4018e-13	8.18732e-12		-0.633905	0.479119	0.497226
O15084	1	0	1		3	0	3				O15084	5.02467	8.38531e-09	3.4231e-08		-0.761536	0.115985	0.146277		-5.95871	1.47026e-06	2.88519e-06
O15118	1	1	1		4	4	6				O15118	3.45426	0.00129122	0.00223		-3.02721	0.00233957	0.0041197		-5.44229	6.68707e-11	2.29534e-10
O15126	1	1	1		3	2	3				O15126	2.21837	6.49381e-06	1.69184e-05		-0.0812956	0.963683	0.994096		-2.26072	6.66128e-07	1.37395e-06
O15127	1	1	1		3	2	3				O15127	2.94246	7.88012e-05	0.000166197		-0.36983	0.248671	0.296719		-3.30846	3.2183e-05	5.2583e-05
O15143	1	1	1		5	5	5				O15143	1.93778	2.12824e-07	7.08669e-07		-0.711978	0.00156416	0.00286219		-3.01511	4.57012e-10	1.42501e-09
O15144	1	1	1		14	11	15				O15144	3.56275	1.64089e-19	2.14464e-18		0.969947	1.29889e-06	4.49967e-06		-2.49508	2.21813e-17	1.48561e-16
O15145	1	1	1		9	7	9				O15145	4.54525	1.75889e-14	1.45772e-13		0.64392	0.0247772	0.0356968		-3.59037	3.20269e-14	1.59322e-13
O15160	1	1	1		3	3	6				O15160	3.94905	3.29855e-06	8.99189e-06		-2.37788	7.94606e-07	2.84843e-06		-4.8521	1.61103e-10	5.28331e-10
O15162	1	1	1		3	3	3				O15162	0.460653	0.400011	0.450054		-2.26777	1.92975e-06	6.49929e-06		-2.72842	3.65337e-06	6.80915e-06
O15173	1	1	1		2	2	4				O15173	3.3867	0.00490132	0.00763849		-2.74594	0.654926	0.714607		-3.06762	2.04819e-09	5.88729e-09
O15230	1	1	1		74	93	85				O15230	-2.53159	2.22818e-94	1.52965e-91		-2.1558	2.71381e-103	1.86303e-100		0.445066	0.026067	0.0293923
O15232	1	1	1		3	7	7				O15232	-2.94035	1.60611e-06	4.61015e-06		-2.54757	2.22233e-10	1.41481e-09		0.297743	0.253535	0.267841
O15240	1	0	0		4	0	0				O15240	5.47832	7.45476e-05	0.000157791		4.1095	0.000111661	0.000264328		-1.66981	0.0890482	0.0964728
O15247	1	0	0		2	0	0				O15247	3.4178	2.42469e-05	5.69401e-05		2.20812	0.0279785	0.039698		-1.20968	0.0319934	0.0358489
O15258	1	1	1		3	3	3				O15258	3.13316	0.000231236	0.00045119		2.03013	0.000767097	0.00150676		-0.27004	0.935979	0.944463
O15260	1	1	1		4	4	4				O15260	2.47405	1.70765e-05	4.13509e-05		0.488721	0.117651	0.148152		-1.88755	5.40058e-05	8.52625e-05
O15264	1	0	0		2	0	0				O15264	6.52082	2.0178e-05	4.81258e-05		4.15862	1.52951e-05	4.32399e-05		-2.36219	0.0949317	0.102712
O15294	1	1	1		13	7	14				O15294	3.17645	3.90729e-15	3.514e-14		-1.42215	6.76965e-08	2.8806e-07		-4.51629	2.34615e-24	2.89336e-23
O15305	1	1	1		3	6	7				O15305	1.20996	0.458985	0.512624		-1.33531	0.348592	0.404579		-3.09049	4.12707e-14	2.02374e-13
O15321	1	1	1		3	4	4				O15321	-0.462068	0.591627	0.644344		-2.06614	0.11737	0.147844		-1.31688	0.026093	0.0294135
O15344	0	1	1		0	4	4				O15344	1.27195	0.0539196	0.0704499		-0.993584	0.108741	0.138114		-2.12548	4.24894e-07	8.97047e-07
O15347	1	1	1		5	9	11				O15347	-0.950035	0.00425051	0.00670286		-2.68893	4.13467e-10	2.49717e-09		-2.17731	4.97254e-11	1.73187e-10
O15355	1	1	1		4	5	6				O15355	1.50893	0.0001309	0.000266524		-1.71302	7.00183e-05	0.000172491		-3.09623	4.79583e-11	1.67407e-10
O15357	1	0	1		4	0	5				O15357	2.70194	8.97931e-06	2.27185e-05		0.0579587	0.986026	1		-2.73229	1.55213e-06	3.02997e-06
O15371	1	1	1		13	11	13				O15371	3.05025	3.24177e-18	3.84808e-17		-0.250183	0.436479	0.495687		-3.30043	5.53474e-22	5.6994e-21
O15372	1	1	1		8	10	9				O15372	0.516042	0.0875279	0.109683		-0.462134	0.0433585	0.0591175		-1.08995	6.63445e-06	1.19647e-05
O15379	0	0	1		0	0	3				O15379	3.72742	5.60049e-08	2.04689e-07		-0.977691	0.00777463	0.0122743		-4.50056	2.65171e-09	7.47597e-09
O15394	0	1	1		0	3	5				O15394	1.44231	0.0186198	0.0262385		-1.34456	0.0104685	0.0161618		-2.23373	8.90779e-07	1.80124e-06
O15397	1	0	1		4	0	5				O15397	4.78148	4.06577e-12	2.53357e-11		0.449147	0.0290284	0.0410041		-5.12564	3.53146e-11	1.24326e-10
O15400	1	1	1		3	3	4				O15400	2.14522	1.55327e-06	4.48663e-06		-0.0421527	0.977279	1		-2.2234	8.89724e-08	2.07166e-07
O15427	1	1	1		5	5	5				O15427	0.0373035	0.99542	1		-2.07782	9.43053e-06	2.76472e-05		-1.92398	8.13415e-06	1.44728e-05
O15460	0	1	1		0	6	11				O15460	1.47496	0.0249829	0.0343932		-5.08632	2.7152e-14	2.89739e-13		-5.49226	1.74495e-19	1.42892e-18
O15484	1	0	1		3	0	3				O15484	2.28522	0.00105599	0.00185564		-0.934683	0.100532	0.128482		-4.5247	3.18277e-06	5.98077e-06
O15498	1	1	1		2	3	4				O15498	2.72929	0.00142934	0.00244292		-0.766234	0.5562	0.616686		-3.83485	2.69408e-05	4.46197e-05
O15511	0	1	1		0	2	4				O15511	2.92744	0.00426966	0.00673047		-1.10775	0.00332391	0.0056999		-5.25261	1.55206e-06	3.02997e-06
O15541	0	0	1		0	0	2
O43143	1	1	1		20	14	24				O43143	3.08287	1.83187e-27	4.65769e-26		-2.33728	9.03205e-28	3.07463e-26		-5.86809	6.46023e-44	3.50127e-42
O43148	1	1	1		5	6	6				O43148	3.60516	9.65229e-14	7.22869e-13		0.403894	0.0711364	0.0934644		-3.7478	2.80129e-13	1.26104e-12
O43150	0	0	1		0	0	2				O43150	-1.38137	0.0789333	0.0997932		-0.990993	0.30311	0.355904		0.390376	0.556249	0.57409
O43172	1	1	1		8	6	9				O43172	2.65086	2.56172e-12	1.62085e-11		-0.753006	0.0333749	0.0465846		-3.67401	2.64401e-13	1.19285e-12
O43175	1	1	1		13	11	13				O43175	4.24808	4.1463e-13	2.83228e-12		-0.555847	0.647409	0.707529		-3.92539	3.64363e-24	4.36283e-23
O43237	1	1	1		6	6	7				O43237	2.06779	1.75295e-08	6.85048e-08		0.292101	0.125387	0.157029		-3.26601	1.00641e-14	5.32142e-14
O43242	1	1	1		25	21	26				O43242	4.10575	6.74966e-36	2.92651e-34		0.897483	2.0033e-14	2.20043e-13		-3.04991	7.91955e-31	1.66432e-29
O43252	1	1	1		5	3	5				O43252	3.91873	5.04241e-12	3.10459e-11		-0.145344	0.559335	0.619828		-3.71449	1.18203e-10	3.94873e-10
O43264	0	0	1		0	0	6				O43264	4.01408	2.49482e-13	1.75361e-12		-1.12093	7.1325e-07	2.58161e-06		-5.6623	2.44784e-15	1.39456e-14
O43286	0	0	1		0	0	2				O43286	-4.05109	1.43685e-06	4.17377e-06		-7.34515	7.77966e-10	4.53887e-09		-3.29406	4.03042e-06	7.4848e-06
O43290	1	1	1		6	4	12				O43290	4.88058	3.55692e-09	1.53253e-08		-1.94565	3.45697e-09	1.77769e-08		-6.37539	1.50283e-18	1.13166e-17
O43293	0	0	1		0	0	2				O43293	5.39956	0.0157504	0.0225107		-0.220968	0.69536	0.751952		-5.62053	0.0100195	0.0117079
O43301	1	0	0		11	0	0				O43301	10.6763	7.28991e-17	7.69927e-16		4.11251	9.90219e-11	6.62128e-10		-5.75674	1.42735e-09	4.18453e-09
O43314	1	0	0		3	0	0				O43314	5.53204	1.2328e-05	3.05162e-05		3.97768	0.000282848	0.000610293		-1.55436	0.00454781	0.00550954
O43324	1	1	1		4	3	4				O43324	0.803012	0.0665105	0.0855046		-0.070061	0.948815	0.982813		-1.33616	0.000525788	0.000712642
O43390	1	1	1		12	12	13				O43390	1.04912	5.90684e-06	1.54773e-05		-1.64581	1.8431e-12	1.54303e-11		-2.73602	1.71143e-19	1.40706e-18
O43395	1	1	1		8	7	9				O43395	2.36755	9.79076e-08	3.43803e-07		-1.85781	8.72063e-11	5.86932e-10		-4.43469	9.51307e-18	6.65269e-17
O43396	1	1	1		13	10	11				O43396	5.77714	7.65267e-30	2.30083e-28		2.36323	3.33781e-21	7.47198e-20		-3.37413	2.20077e-21	2.15833e-20
O43399	1	1	1		2	6	6				O43399	-1.02169	0.115729	0.142338		-3.17528	5.12824e-06	1.58583e-05		-3.12189	6.79895e-08	1.61691e-07
O43426	1	0	1		12	0	8				O43426	7.81178	3.71082e-17	4.02233e-16		2.14981	3.55752e-10	2.18057e-09		-4.91315	1.34638e-09	3.9669e-09
O43427	1	1	1		4	3	5				O43427	3.71151	3.27358e-09	1.42085e-08		-0.0914844	0.992194	1		-3.17464	8.36497e-10	2.53348e-09
O43432	1	0	1		6	0	6				O43432	7.66939	1.36089e-11	7.95108e-11		0.625403	0.00408974	0.00686736		-7.18248	3.15516e-10	9.96633e-10
O43488	1	1	1		6	4	9				O43488	3.97919	6.69625e-09	2.76095e-08		-2.5944	1.61648e-08	7.57483e-08		-6.23778	3.89552e-22	4.0725e-21
O43491	1	1	1		21	21	23				O43491	1.29707	5.66608e-06	1.49128e-05		-1.61416	1.77657e-18	3.14063e-17		-2.99092	8.21988e-31	1.71866e-29
O43493	1	1	1		2	4	4				O43493	-0.940439	0.0101585	0.0150029		-2.74982	2.71543e-09	1.44134e-08		-1.65442	3.78339e-05	6.09933e-05
O43505	1	1	1		5	4	4				O43505	7.29782	6.55455e-14	5.05584e-13		3.09801	2.20419e-09	1.19304e-08		-2.83391	0.00125244	0.00161516
O43583	1	1	1		3	3	3				O43583	4.13689	3.62664e-06	9.83419e-06		1.37851	0.00165184	0.00300526		-1.73232	0.000829219	0.00109543
O43592	1	1	1		11	8	13				O43592	3.98302	5.97585e-19	7.50443e-18		-0.038359	0.999899	1		-4.19732	8.39818e-20	7.14713e-19
O43615	1	0	1		2	0	4				O43615	4.44591	0.00013036	0.000265555		0.659255	0.0383398	0.0527284		-5.85448	9.09939e-08	2.11634e-07
O43617	1	1	1		3	2	3				O43617	3.01787	4.26332e-07	1.35082e-06		0.48135	0.0739639	0.096778		-2.13148	6.2812e-05	9.80382e-05
O43633	1	1	1		4	4	5				O43633	-0.0404311	0.998629	1		-2.01705	6.35109e-08	2.71371e-07		-2.18696	2.22237e-06	4.24776e-06
O43657	0	0	1		0	0	2				O43657	0.559437	0.834902	0.872612		-1.43417	0.00441947	0.00737592		-1.9936	0.0016444	0.00208923
O43663	0	1	1		0	3	3				O43663	-0.54851	0.951135	0.976024		-6.26051	3.44258e-07	1.31418e-06		-3.85552	3.00215e-07	6.49809e-07
O43670	1	1	1		3	3	3				O43670	1.09692	0.00189771	0.00318138		-1.67383	0.000459663	0.000948572		-2.06155	2.92299e-05	4.80823e-05
O43681	1	1	1		5	4	5				O43681	3.95083	1.494e-09	6.83752e-09		0.567778	0.143736	0.178759		-3.2257	7.67442e-09	2.05667e-08
O43684	1	1	1		10	9	10				O43684	3.09462	2.95966e-17	3.25958e-16		-0.112634	0.967325	0.99735		-3.24522	1.91979e-17	1.29633e-16
O43707	1	1	1		31	28	36				O43707	1.50246	1.43777e-24	3.03702e-23		-1.70519	1.14236e-34	7.02295e-33		-3.0945	6.44143e-57	6.63307e-55
O43709	0	1	1		0	3	3				O43709	2.66352	1.75603e-06	5.00906e-06		-2.85616	4.91388e-05	0.000125017		-4.69643	3.42255e-10	1.07779e-09
O43719	1	1	1		5	5	7				O43719	3.31725	4.78797e-12	2.95677e-11		0.856968	0.000331554	0.000706868		-2.82402	2.50838e-09	7.1077e-09
O43747	1	1	1		13	5	12				O43747	5.96529	1.11792e-16	1.15988e-15		1.77059	1.5195e-09	8.46929e-09		-3.56339	5.42064e-16	3.25002e-15
O43759	1	0	1		3	0	3				O43759	6.40157	1.59437e-07	5.41402e-07		3.7622	1.04857e-09	5.9987e-09		-2.63936	0.000130475	0.000193808
O43760	0	1	1		0	2	2				O43760	-0.552058	0.488983	0.543183		-1.18266	0.172701	0.212092		-0.630603	0.0875233	0.0948457
O43761	0	0	1		0	0	2				O43761	5.8757	3.16961e-07	1.02317e-06		1.19915	0.115516	0.14582		-4.67655	1.24441e-06	2.47143e-06
O43765	1	0	1		2	0	3				O43765	1.70032	0.000366276	0.000689846		-0.733656	0.00857194	0.0134301		-4.41514	3.51506e-07	7.54089e-07
O43776	1	1	1		17	15	20				O43776	2.30674	9.88704e-18	1.11575e-16		-0.521676	0.0386873	0.0531354		-3.62393	1.05918e-29	2.03868e-28
O43795	1	1	1		19	19	24				O43795	1.74148	6.76867e-14	5.20152e-13		-1.64676	2.60371e-24	7.19777e-23		-3.41007	1.92248e-32	4.65688e-31
O43809	1	1	1		6	5	6				O43809	1.72278	0.000121615	0.000248602		-1.30512	0.000427922	0.000888413		-2.50125	1.48602e-08	3.85935e-08
O43813	1	1	1		6	4	6				O43813	6.62779	3.06301e-10	1.54237e-09		2.73081	1.84545e-10	1.18958e-09		-4.41487	2.24946e-11	8.14909e-11
O43815	1	0	1		6	0	8				O43815	5.61614	5.1187e-11	2.82626e-10		0.574172	0.498416	0.558784		-4.85379	7.86587e-11	2.68208e-10
O43818	1	1	1		2	5	5				O43818	-0.305704	0.518027	0.573128		-2.3413	1.06722e-08	5.14139e-08		-2.0356	1.51378e-07	3.39242e-07
O43823	0	0	1		0	0	4				O43823	2.11038	0.0618841	0.0800065		-3.3031	0.00232478	0.00409973		-5.40542	7.8521e-08	1.84605e-07
O43837	1	1	1		8	5	8				O43837	7.36642	2.04048e-20	2.90822e-19		2.35792	3.77401e-12	3.0661e-11		-4.57474	3.66072e-15	2.04408e-14
O43847	0	0	1		0	0	2				O43847	8.50399	5.25017e-05	0.000114846		-0.799853	0.0626255	0.0832917		-9.30384	7.05865e-07	1.45155e-06
O43852	0	1	1		0	3	5				O43852	2.16091	3.08161e-05	7.09378e-05		-2.31217	5.99025e-05	0.000149665		-4.96585	1.51007e-12	6.17062e-12
O43854	1	1	1		23	21	23				O43854	0.313851	0.347444	0.395665		-3.10102	8.6943e-44	8.95295e-42		-3.48161	2.71277e-41	1.25549e-39
O43865	1	1	1		8	2	7				O43865	5.38336	6.8281e-11	3.72023e-10		2.36256	6.50445e-10	3.82741e-09		-2.70146	3.51964e-05	5.70764e-05
O43897	0	0	1		0	0	3				O43897	6.36339	0.000748382	0.00134435		-4.55973	0.0762978	0.0996103		-6.51186	1.40912e-06	2.77048e-06
O43924	0	0	1		0	0	2				O43924	1.61899	0.0141121	0.0203386		-1.79908	0.353265	0.409195		-3.41807	0.00373781	0.00456991
O60216	0	1	1		0	3	5				O60216	-0.633324	0.609039	0.66173		-1.91811	5.17583e-08	2.24886e-07		-1.66361	0.000934357	0.00122685
O60218	1	0	0		2	0	0				O60218	11.3725	1.39966e-05	3.43372e-05		6.16042	7.33258e-05	0.000180101		-5.21211	0.0199865	0.0227102
O60231	1	1	1		9	7	18				O60231	2.21577	1.33532e-11	7.81276e-11		-3.06706	1.09482e-21	2.50532e-20		-4.97688	1.03313e-31	2.30025e-30
O60244	0	0	1		0	0	7				O60244	-0.69225	0.88394	0.917115		-6.84947	6.20552e-12	4.84101e-11		-8.00407	4.67342e-09	1.28247e-08
O60245	0	0	1		0	0	4				O60245	0.714358	0.191149	0.227227		-1.8929	0.0220534	0.0320868		-3.66897	0.00251573	0.00312871
O60256	1	1	1		5	4	7				O60256	3.1124	8.26274e-10	3.95287e-09		0.212812	0.473423	0.532941		-4.90722	1.0611e-11	3.99515e-11
O60264	1	1	1		18	18	19				O60264	2.4535	1.45568e-19	1.92795e-18		-1.22635	3.29249e-11	2.34227e-10		-3.62584	7.52532e-33	1.9373e-31
O60268	1	0	0		2	0	0				O60268	5.15127	4.88314e-06	1.30017e-05		1.3813	0.0262629	0.0376137		-3.76997	7.67389e-05	0.000118372
O60271	1	1	1		11	15	19				O60271	0.694576	3.60843e-08	1.35119e-07		-1.68502	4.57298e-16	6.05663e-15		-2.1515	1.51294e-21	1.50164e-20
O60282	1	1	1		25	7	18				O60282	5.28437	7.36236e-40	4.15419e-38		2.51332	2.48856e-22	6.06532e-21		-4.00294	2.22123e-20	1.9933e-19
O60287	0	0	1		0	0	3				O60287	-0.06909	0.929494	0.958585		-9.37802	2.31064e-05	6.31973e-05		-8.87812	9.84076e-07	1.97824e-06
O60306	1	1	1		9	7	17				O60306	1.07676	2.65799e-06	7.32457e-06		-2.47783	7.32753e-20	1.43724e-18		-3.9131	2.35866e-24	2.90009e-23
O60313	1	1	1		13	5	13				O60313	2.80657	7.49411e-14	5.72694e-13		-1.50169	1.00417e-07	4.13003e-07		-4.46664	6.41884e-23	6.97604e-22
O60341	1	1	1		9	3	9				O60341	3.00914	1.26514e-10	6.68092e-10		-0.635408	0.0139818	0.0210801		-4.65746	3.53584e-14	1.75049e-13
O60443	0	1	1		0	5	5				O60443	-0.547736	0.222881	0.262449		-3.14419	6.10996e-10	3.60558e-09		-2.62258	2.60692e-09	7.35976e-09
O60488	1	1	1		8	9	11				O60488	1.14126	0.000132605	0.000269729		-1.6267	3.12219e-10	1.92502e-09		-2.67899	1.08314e-19	9.10501e-19
O60493	1	1	1		6	5	6				O60493	2.17697	9.63715e-09	3.90703e-08		-0.0144952	0.999961	1		-2.60922	7.05535e-10	2.15746e-09
O60502	1	1	1		3	3	4				O60502	1.74991	5.25947e-05	0.000114988		-0.6533	0.0270615	0.038583		-2.86691	6.6735e-08	1.58891e-07
O60506	1	1	1		13	16	19				O60506	0.632369	0.0788352	0.0996998		-2.8376	3.03844e-24	8.34355e-23		-3.00607	1.88213e-30	3.80023e-29
O60513	0	0	1		0	0	3				O60513	2.61484	8.70321e-05	0.000182528		-1.63756	7.78515e-05	0.000189634		-4.2524	5.79167e-07	1.20241e-06
O60524	1	0	1		2	0	2				O60524	4.72474	5.02281e-07	1.56616e-06		0.0717512	0.892751	0.935447		-4.65299	3.69776e-07	7.89585e-07
O60547	1	1	1		7	3	6				O60547	6.66633	5.10804e-13	3.45484e-12		2.07128	2.00907e-09	1.09462e-08		-3.976	1.30117e-11	4.85463e-11
O60551	0	0	1		0	0	6				O60551	3.34995	5.72658e-06	1.50528e-05		-4.20154	0.000429313	0.000890852		-6.63274	3.5672e-15	1.99909e-14
O60565	1	1	1		2	5	5				O60565	-4.7742	2.61383e-09	1.15148e-08		-6.61591	2.8677e-12	2.35769e-11		-1.05516	0.0231382	0.0261902
O60568	0	1	1		0	4	4				O60568	-0.99634	0.959186	0.982807		-2.47676	0.00021695	0.000479152		-1.65689	3.50265e-06	6.54601e-06
O60610	1	1	1		16	13	23				O60610	3.13847	6.60012e-20	9.00195e-19		-0.646131	0.000900784	0.00173056		-3.84365	1.16525e-31	2.55301e-30
O60641	1	0	1		4	0	2				O60641	4.45187	1.16962e-05	2.91273e-05		2.20252	0.00293547	0.00509746		-0.41236	0.761535	0.777004
O60645	1	1	1		3	4	5				O60645	2.28438	5.66571e-08	2.06706e-07		-1.33185	1.66676e-05	4.67989e-05		-3.27325	1.19958e-09	3.56242e-09
O60664	0	1	1		0	7	8				O60664	0.681155	0.318945	0.365943		-2.16308	1.24125e-10	8.19347e-10		-2.51545	4.65911e-12	1.82423e-11
O60678	0	0	1		0	0	2				O60678	1.11637	0.0728159	0.0927423		-0.823317	0.0143131	0.0215009		-1.93969	0.00222542	0.00277941
O60684	1	1	1		4	3	5				O60684	2.43621	1.35775e-05	3.33886e-05		-0.899369	0.000124844	0.000292012		-3.76146	2.61642e-13	1.18299e-12
O60701	1	1	1		6	5	8				O60701	3.79194	1.45856e-11	8.48561e-11		-0.0902741	0.949576	0.983234		-4.19492	2.6925e-17	1.79747e-16
O60716	1	1	1		9	8	10				O60716	1.21946	0.0134068	0.0194241		-1.24127	1.38678e-06	4.77603e-06		-2.33179	8.85168e-12	3.36347e-11
O60749	1	1	1		14	10	14				O60749	3.18456	1.28141e-25	2.90007e-24		-0.0277199	0.999998	1		-3.60698	1.01846e-27	1.64511e-26
O60762	1	0	1		2	0	2				O60762	3.87365	0.0183172	0.0258562		-0.673483	0.120924	0.151764		-4.54713	0.00514329	0.00619632
O60763	1	1	1		18	8	19				O60763	7.30431	2.09376e-37	9.80022e-36		2.81997	6.6718e-38	4.99657e-36		-4.90725	2.97064e-29	5.48702e-28
O60784	1	0	0		7	0	0				O60784	9.97882	1.51264e-12	9.79646e-12		2.75306	5.88631e-10	3.48358e-09		-6.85535	1.05635e-08	2.79276e-08
O60814;P57053;P58876;P62807;Q5QNW6;Q93079;Q99877;Q99879;Q99880	1	1	1		7	8	10				O60814;P57053;P58876;P62807;Q5QNW6;Q93079;Q99877;Q99879;Q99880	-2.41762	1.30201e-12	8.49916e-12		-6.09427	7.97195e-17	1.18117e-15		-3.02318	5.3113e-11	1.84307e-10
O60825	1	0	1		6	0	6				O60825	8.1195	1.88243e-13	1.35638e-12		2.03043	2.07528e-08	9.57232e-08		-6.29272	4.36857e-10	1.36526e-09
O60826	0	1	1		0	2	4				O60826	4.25385	0.00108763	0.00190474		-0.900621	0.506533	0.567267		-5.58146	2.13831e-06	4.10748e-06
O60832	1	1	1		4	9	11				O60832	-0.0807949	1	1		-2.12369	1.34408e-10	8.82974e-10		-1.94025	4.75413e-12	1.85614e-11
O60841	1	1	1		10	9	13				O60841	2.94349	1.05982e-11	6.28113e-11		-0.286707	0.87177	0.916259		-3.39734	4.14263e-11	1.45469e-10
O60884	1	1	1		8	7	8				O60884	1.60215	2.97063e-07	9.63467e-07		-0.512003	0.00155627	0.00284901		-2.17831	1.7641e-11	6.50521e-11
O60885	1	1	1		2	4	5				O60885	2.22811	3.18536e-09	1.38548e-08		-2.69177	1.05841e-11	7.99929e-11		-5.18853	2.26846e-15	1.29956e-14
O60911	1	1	1		5	9	8				O60911	-2.27836	1.99685e-07	6.68701e-07		-3.15659	2.0629e-13	1.97149e-12		-0.878107	0.00665164	0.00791395
O60936	1	0	0		3	0	0				O60936	2.34999	9.01047e-07	2.70892e-06		2.07052	0.177821	0.217925		-3.27437	0.00463839	0.00561267
O60942	1	0	1		5	0	5				O60942	6.11348	2.25887e-06	6.32084e-06		0.00981904	0.999944	1		-6.98725	7.54086e-07	1.54301e-06
O75044	1	1	1		4	4	5				O75044	0.812872	0.00692111	0.0105196		-2.17213	9.30877e-09	4.54299e-08		-2.63902	1.6066e-08	4.14636e-08
O75054	0	1	1		0	8	11				O75054	1.28865	0.0782989	0.0991128		-3.00824	3.75983e-09	1.92621e-08		-3.29531	1.04426e-18	8.00988e-18
O75061	1	0	0		4	0	0				O75061	6.20903	2.08896e-05	4.95647e-05		2.0874	0.000301107	0.000646641		-4.162	0.00405052	0.00494051
O75083	1	1	1		21	13	22				O75083	5.4841	2.08497e-46	2.147e-44		1.75902	3.70828e-30	1.57468e-28		-3.88999	5.48044e-40	2.30346e-38
O75110	1	0	1		9	0	4				O75110	7.45701	2.82787e-15	2.56564e-14		2.81867	1.17657e-10	7.7915e-10		-4.63834	6.90816e-09	1.86711e-08
O75116	1	1	1		12	14	16				O75116	2.07514	2.42414e-12	1.54328e-11		-0.279607	0.117107	0.147602		-2.76893	7.67803e-20	6.56137e-19
O75122	1	0	1		4	0	4				O75122	3.13271	5.1496e-08	1.88712e-07		1.36068	0.00274505	0.00479511		-1.79353	0.0012621	0.0016266
O75131	1	1	1		7	6	7				O75131	0.800592	0.0577	0.0749736		-3.12111	1.46637e-09	8.18427e-09		-3.15375	1.19466e-13	5.61735e-13
O75146	0	0	1		0	0	2				O75146	5.28217	6.12945e-05	0.000131633		-1.70821	0.000221678	0.000489068		-6.99039	1.82187e-05	3.07795e-05
O75150	1	1	1		2	2	4				O75150	3.52981	9.65079e-06	2.43278e-05		-0.236666	0.636326	0.69634		-3.58762	1.48841e-08	3.86312e-08
O75153	1	0	1		7	0	8				O75153	3.0677	5.7893e-13	3.89007e-12		0.796839	0.00492977	0.0081451		-2.43419	1.9958e-10	6.46791e-10
O75155	1	0	0		2	0	0				O75155	5.49899	1.1484e-07	3.98507e-07		2.34411	7.98676e-05	0.000194085		-3.15488	2.82466e-05	4.66323e-05
O75165	1	1	1		13	15	17				O75165	2.41753	1.27062e-09	5.87392e-09		-0.677014	0.00159396	0.00291154		-2.79791	8.19564e-17	5.28291e-16
O75190	0	1	0		0	2	0				O75190	-0.120976	0.986171	1		0.860713	0.530377	0.590782		0.981689	0.102007	0.110135
O75191	1	0	0		3	0	0				O75191	3.2149	0.00797183	0.0119839		5.06787	0.0010755	0.00203584		-1.10018	0.383661	0.400279
O75223	1	1	1		4	5	5				O75223	-1.77509	4.24433e-06	1.13818e-05		-2.31861	5.60782e-06	1.71737e-05		-0.377707	0.337713	0.353325
O75323	0	0	1		0	0	2				O75323	4.21783	0.0115865	0.0169417		-1.22373	0.0889634	0.114548		-5.44156	0.000404796	0.000558204
O75330	0	1	1		0	3	4				O75330	2.18411	5.24473e-05	0.000114788		-0.512002	0.862937	0.908366		-3.28647	1.20334e-09	3.57101e-09
O75340	1	1	1		8	8	9				O75340	0.594219	0.121223	0.148298		-2.33154	3.06843e-14	3.2242e-13		-2.97559	1.1752e-12	4.86987e-12
O75347	0	0	1		0	0	4				O75347	2.5765	0.00150651	0.00256948		-2.69563	0.00408602	0.00686391		-3.59186	1.22651e-07	2.78962e-07
O75348	0	1	1		0	2	2				O75348	-0.372472	0.726073	0.773189		-2.6587	0.0080267	0.0126529		-2.28623	0.000480848	0.000655415
O75351	1	1	1		6	5	6				O75351	2.54106	1.28231e-08	5.10815e-08		-0.257991	0.629484	0.689403		-2.77456	3.10536e-11	1.09794e-10
O75367	1	1	1		7	9	10				O75367	-1.50878	0.00320217	0.00516233		-4.01999	9.16552e-17	1.33875e-15		-3.13728	1.49201e-15	8.71714e-15
O75368	0	0	1		0	0	2				O75368	2.85652	0.0016052	0.00272877		-4.11084	0.000533763	0.00108197		-6.96737	1.79348e-06	3.46824e-06
O75369	1	1	1		61	65	80				O75369	2.24098	1.56028e-52	2.3803e-50		-1.31737	8.119e-48	9.83593e-46		-3.38424	3.44015e-116	2.02428e-113
O75379	1	0	1		3	0	2				O75379	5.68491	2.99448e-08	1.13785e-07		2.30756	5.08307e-07	1.88115e-06		-3.67697	1.85349e-06	3.57924e-06
O75382	0	0	1		0	0	2				O75382	4.87276	0.000238533	0.000463889		-0.40166	0.13743	0.171382		-5.27442	3.50863e-06	6.55421e-06
O75390	1	1	1		15	8	17				O75390	5.97406	1.24938e-25	2.8432e-24		1.06674	1.98187e-06	6.64767e-06		-6.07293	1.6183e-30	3.28364e-29
O75396	1	1	1		7	6	7				O75396	3.71478	1.15566e-14	9.79461e-14		1.65171	2.59166e-08	1.18349e-07		-2.09707	1.05187e-09	3.15102e-09
O75400	0	1	1		0	4	7				O75400	0.458922	0.740755	0.786182		-4.05745	4.20354e-10	2.53505e-09		-5.05767	9.71804e-17	6.23499e-16
O75436	1	1	1		10	8	10				O75436	1.85315	4.76499e-08	1.75869e-07		-0.253188	0.348067	0.404197		-1.92686	7.37311e-13	3.12447e-12
O75439	1	1	1		5	4	8				O75439	3.59581	1.14943e-09	5.3437e-09		0.860896	0.000719891	0.00142081		-5.05623	2.45534e-13	1.11415e-12
O75448	0	0	1		0	0	7				O75448	1.86759	0.021312	0.0296768		-1.27792	4.38119e-05	0.000112859		-3.53318	1.84654e-10	6.02209e-10
O75475	1	1	1		10	10	15				O75475	1.03308	0.00747667	0.0113097		-3.31151	1.48323e-22	3.65834e-21		-4.44647	6.79382e-26	9.51829e-25
O75477	1	1	1		2	3	4				O75477	2.1796	5.82366e-05	0.000126052		-1.00167	0.0184486	0.0272291		-2.77167	3.58203e-07	7.6646e-07
O75487	0	1	1		0	4	5				O75487	0.635222	0.106661	0.131695		-1.37244	0.00324045	0.00556607		-1.7828	3.41133e-05	5.55606e-05
O75489	0	0	1		0	0	2				O75489	2.94049	0.00119864	0.00208145		-1.1761	0.0156277	0.023382		-4.11659	8.96423e-06	1.58607e-05
O75494	1	1	1		3	3	4				O75494	-0.524805	0.32868	0.376379		-4.11728	9.75888e-10	5.61408e-09		-3.33373	1.92348e-08	4.90881e-08
O75508	0	1	1		0	2	3				O75508	-2.08956	0.00021305	0.000418281		-4.74242	1.57621e-06	5.38343e-06		-3.18743	0.00227601	0.00284087
O75530	0	1	1		0	5	5				O75530	-1.39	0.800404	0.840608		-5.13829	0.000135039	0.000313367		-4.22537	0.000831961	0.0010987
O75531	0	1	1		0	3	4				O75531	-0.0584714	0.72696	0.773734		-3.13933	7.37634e-08	3.11303e-07		-1.74821	2.54741e-05	4.2395e-05
O75533	1	1	1		41	35	41				O75533	1.98324	3.0166e-25	6.57428e-24		-0.990321	3.56358e-18	6.14158e-17		-3.01723	4.15016e-50	3.1081e-48
O75534	1	1	1		8	7	9				O75534	3.19781	2.33698e-11	1.34254e-10		-0.0832713	0.97646	1		-3.32428	1.37616e-12	5.66841e-12
O75569	1	0	1		4	0	4				O75569	7.86809	1.35504e-12	8.83135e-12		-0.240135	0.487637	0.547445		-7.83533	4.49448e-09	1.23418e-08
O75600	1	0	0		3	0	0				O75600	8.16739	0.0029979	0.00485773		4.89975	1.48363e-05	4.20293e-05		-3.4592	0.144187	0.154543
O75608	0	1	1		0	3	3				O75608	1.57549	0.0709869	0.090637		-3.84967	1.3028e-07	5.25074e-07		-4.2726	1.78651e-08	4.5769e-08
O75643	1	1	1		53	47	65				O75643	1.657	1.87846e-28	5.19286e-27		-2.02885	1.45786e-65	3.5323e-63		-3.70929	1.85685e-94	5.88335e-92
O75663	1	0	0		3	0	0				O75663	3.37952	5.4713e-06	1.44463e-05		1.83074	0.0590208	0.0787773		0.905193	0.745143	0.760843
O75688	1	1	1		2	3	3				O75688	-0.395008	0.579752	0.632918		-0.773776	0.322587	0.376733		-2.85141	0.000338725	0.000472875
O75691	0	1	1		0	5	7				O75691	1.15806	0.00684522	0.0104119		-2.08795	0.00152586	0.0028008		-3.24601	1.14263e-10	3.82331e-10
O75694	1	0	1		5	0	5				O75694	5.51996	1.00904e-10	5.37675e-10		-0.068992	0.941522	0.978337		-5.23278	2.02307e-10	6.54596e-10
O75695	1	1	1		3	5	6				O75695	1.36108	0.019417	0.0272592		-2.66742	1.8618e-07	7.39512e-07		-3.82571	1.23394e-11	4.61215e-11
O75717	0	1	1		0	2	2				O75717	-2.49813	0.230165	0.27064		-5.53531	0.00341745	0.00583359		-3.03719	3.77027e-05	6.08055e-05
O75718	1	1	1		4	4	6				O75718	1.46681	0.124686	0.152263		-3.74308	5.06477e-08	2.20526e-07		-4.85063	1.21659e-12	5.03631e-12
O75787	1	1	1		4	3	5				O75787	1.33981	5.13637e-05	0.000112715		-2.14512	0.000576462	0.00115996		-3.81951	1.29213e-08	3.39e-08
O75821	1	1	1		8	7	8				O75821	1.55361	3.21024e-06	8.78019e-06		0.25723	0.344201	0.40016		-0.960932	0.0128933	0.0148969
O75822	0	1	1		0	3	3				O75822	-1.20717	0.0447578	0.0591837		-1.29549	0.043656	0.0594639		-0.225294	0.502759	0.520449
O75828	1	1	1		3	5	8				O75828	1.83407	0.000519695	0.000958201		-3.40163	1.58826e-10	1.0326e-09		-4.10385	7.33561e-17	4.73595e-16
O75874	1	1	1		15	13	17				O75874	4.25706	1.46479e-30	4.64113e-29		1.76633	6.75348e-08	2.87669e-07		-2.7886	8.37415e-25	1.07122e-23
O75882	0	0	1		0	0	2				O75882	2.45672	0.301079	0.346506		-3.58271	0.000260594	0.000566133		-6.03944	1.26685e-06	2.51356e-06
O75886	1	1	1		2	4	5				O75886	3.49968	2.95299e-09	1.29123e-08		-0.585163	0.794988	0.846138		-5.3767	2.22749e-06	4.2536e-06
O75909	1	0	1		2	0	3				O75909	4.7521	0.00575971	0.00888549		-0.485785	0.207838	0.251863		-5.3456	1.12827e-06	2.24943e-06
O75914	1	0	0		2	0	0				O75914	8.13887	0.000488355	0.00090528		4.90508	3.29545e-06	1.06296e-05		-3.23379	0.0556903	0.0612683
O75915	1	1	1		2	3	3				O75915	3.15549	1.91399e-07	6.43044e-07		1.77391	5.82704e-05	0.000146262		-1.32209	0.00148405	0.00189309
O75934	1	1	1		4	3	6				O75934	3.5333	0.000127483	0.000259951		-1.60004	0.000826504	0.00160659		-4.59271	2.552e-10	8.1297e-10
O75935	0	1	1		0	2	2				O75935	0.153828	0.00640748	0.00979311		-2.67676	0.0314721	0.0441832		-2.83059	0.000198074	0.000286197
O75937	0	1	1		0	4	4				O75937	-0.415478	0.0511445	0.0671547		-1.78019	0.0005009	0.00102392		-1.65562	0.0138719	0.0159828
O75940	1	0	1		3	0	4				O75940	3.46803	1.06692e-05	2.67313e-05		-1.64273	2.54526e-05	6.8702e-05		-5.11077	2.19957e-10	7.06158e-10
O75947	0	0	1		0	0	3				O75947	4.41772	1.60257e-05	3.90591e-05		-1.57995	0.00175738	0.00317529		-5.99767	1.39411e-07	3.14303e-07
O75954	0	1	1		0	2	2				O75954	-0.270571	0.485657	0.539779		-3.40678	3.78733e-06	1.20837e-05		-3.13621	9.942e-06	1.7426e-05
O75955	1	1	1		19	17	20				O75955	1.21265	3.51377e-08	1.31903e-07		-1.6519	6.23707e-17	9.34199e-16		-3.20624	2.13475e-25	2.89245e-24
O75962	0	0	1		0	0	5				O75962	4.1321	1.82045e-08	7.0922e-08		-1.52579	0.000183002	0.000411454		-6.2907	7.20771e-10	2.19915e-09
O75976	1	1	1		8	6	8				O75976	3.69663	1.96907e-11	1.13594e-10		0.814711	0.123587	0.154869		-3.05231	7.37139e-09	1.9845e-08
O76003	1	1	1		3	5	6				O76003	2.57797	0.000108877	0.000224457		-0.958108	0.0857099	0.110809		-2.97762	3.33741e-10	1.05178e-09
O76021	1	1	1		2	12	19				O76021	-0.395142	0.166414	0.199842		-4.41874	3.89217e-29	1.52684e-27		-4.35756	3.57596e-33	9.32238e-32
O76038	1	0	0		3	0	0				O76038	5.1744	0.000349247	0.000659616		5.26017	9.90782e-06	2.8923e-05		0.0857676	0.972814	0.978038
O76061	1	1	1		2	2	2				O76061	-2.72498	0.00372596	0.00592787		-2.38288	0.00751998	0.0118894		0.342093	0.529804	0.547345
O76094	1	1	1		13	7	16				O76094	4.28385	4.0013e-17	4.30323e-16		0.142062	0.952101	0.985353		-4.19517	2.95631e-27	4.56069e-26
O94760	1	1	1		3	4	5				O94760	1.37511	0.344081	0.392486		-1.66045	2.88137e-08	1.30422e-07		-3.11343	4.69619e-09	1.28786e-08
O94776	1	1	1		12	14	16				O94776	2.63762	2.05448e-20	2.91808e-19		-1.22832	5.14121e-13	4.644e-12		-4.10881	4.44974e-30	8.81178e-29
O94788	1	0	0		14	0	0				O94788	8.10372	6.85405e-31	2.20561e-29		6.1353	3.48799e-33	1.9156e-31		-2.83347	2.08155e-10	6.72464e-10
O94804	0	1	1		0	2	2				O94804	-0.701651	0.34934	0.397385		-3.72309	0.00014128	0.000326379		-3.02144	0.00771748	0.00913194
O94813	0	1	1		0	20	22				O94813	-1.49178	0.00177309	0.00298951		-4.26747	2.44928e-25	7.25799e-24		-3.06091	2.12908e-34	5.88569e-33
O94826	1	0	1		5	0	7				O94826	8.05051	1.19727e-07	4.14766e-07		-0.52513	0.00484658	0.00802375		-8.57564	2.91953e-09	8.19179e-09
O94855	1	0	1		5	0	6				O94855	9.20579	2.92643e-10	1.4772e-09		3.16502	2.11366e-09	1.15009e-08		-6.32234	7.34437e-09	1.97851e-08
O94856	1	0	0		3	0	0				O94856	6.82593	0.000125608	0.00025651		5.55453	0.0114759	0.0175723		-3.54001	0.0160192	0.018349
O94874	1	1	1		9	8	13				O94874	4.35845	1.81045e-07	6.10248e-07		1.07885	2.51102e-07	9.78516e-07		-2.91881	4.71553e-17	3.09781e-16
O94903	1	0	0		2	0	0				O94903	5.05059	0.000945268	0.00167465		3.08126	0.00441106	0.00736487		-1.96933	0.196765	0.209587
O94906	1	1	1		11	13	15				O94906	2.06617	4.70595e-14	3.67814e-13		-0.987202	2.89765e-09	1.52432e-08		-3.06488	9.14667e-22	9.2341e-21
O94910	1	0	0		2	0	0				O94910	5.31575	0.00027867	0.000536625		0.718425	0.0888221	0.114402		-4.59733	0.000315955	0.000443413
O94915	1	1	1		6	7	12				O94915	3.73436	2.23191e-09	9.92788e-09		-2.90105	3.38334e-17	5.29884e-16		-5.31576	4.44041e-18	3.21442e-17
O94923	0	1	1		0	4	4				O94923	1.04395	0.34278	0.391545		-2.78361	0.00406565	0.00683528		-2.49887	7.90415e-06	1.40879e-05
O94925	1	0	1		8	0	9				O94925	5.87401	5.65832e-15	4.98005e-14		1.87587	1.49664e-08	7.03729e-08		-4.4735	2.13167e-09	6.10171e-09
O94952	1	0	1		2	0	2				O94952	7.2745	0.000173184	0.000345781		1.17122	0.00740771	0.0117446		-6.10328	0.000329602	0.000460839
O94973	1	1	1		15	11	18				O94973	3.43342	9.46187e-15	8.13642e-14		0.772698	5.60702e-08	2.42598e-07		-3.04806	3.29876e-13	1.46734e-12
O94979	1	1	1		13	12	16				O94979	4.07677	9.5435e-28	2.45686e-26		1.93635	1.02629e-18	1.83795e-17		-3.4605	7.05824e-22	7.19626e-21
O94985	0	1	1		0	3	3				O94985	-0.328213	0.471665	0.525504		-1.38783	0.121574	0.152533		-1.05961	0.229927	0.243838
O94992	1	1	1		6	5	9				O94992	1.13689	0.00107756	0.00188871		-3.06868	1.29278e-08	6.16313e-08		-4.10616	1.38764e-17	9.47877e-17
O95025	0	1	1		0	7	15				O95025	0.872903	0.121001	0.14807		-5.03356	4.75707e-17	7.25717e-16		-5.56717	1.43834e-33	3.82228e-32
O95084	1	1	1		4	6	8				O95084	-1.12509	0.00779634	0.0117458		-4.58616	1.25411e-15	1.54199e-14		-2.15905	1.54544e-10	5.09254e-10
O95104	0	0	1		0	0	4				O95104	0.934037	0.143224	0.173511		-2.14564	0.000849333	0.00164399		-4.63511	1.79207e-06	3.46714e-06
O95155	1	0	1		9	0	10				O95155	6.01802	1.88688e-13	1.35638e-12		1.02954	0.0218953	0.0318793		-5.53779	5.82486e-12	2.2486e-11
O95163	1	1	1		6	4	11				O95163	3.87419	1.76435e-06	5.02582e-06		-2.22863	2.674e-11	1.92556e-10		-4.53526	2.35952e-16	1.47033e-15
O95197	1	0	1		2	0	2				O95197	3.69523	3.29984e-05	7.53858e-05		0.378589	0.615491	0.675875		-3.31664	2.90865e-05	4.78655e-05
O95219	1	0	1		5	0	6				O95219	3.44564	6.79297e-09	2.79523e-08		1.06738	0.0280993	0.0398421		-2.89648	4.03846e-05	6.48263e-05
O95232	1	1	1		7	4	8				O95232	3.46694	1.84755e-15	1.69489e-14		-2.17524	1.77409e-11	1.30026e-10		-5.44773	8.66681e-21	8.15036e-20
O95235	0	0	1		0	0	5				O95235	2.23773	0.00158028	0.00268863		-1.60248	2.67826e-05	7.19396e-05		-3.62881	2.54072e-11	9.13994e-11
O95239	1	1	1		4	7	13				O95239	1.52266	0.000133983	0.000272398		-2.7155	8.49057e-12	6.46445e-11		-3.73793	4.21796e-22	4.37626e-21
O95251	1	0	1		3	0	4				O95251	3.43755	9.47246e-06	2.39075e-05		-2.07428	5.92898e-07	2.16119e-06		-6.60822	6.64937e-08	1.585e-07
O95292	0	0	1		0	0	2				O95292	1.94369	0.18524	0.220649		-1.27511	0.999912	1		-3.2188	0.109318	0.117689
O95297	1	1	1		3	4	4				O95297	0.0834334	0.999007	1		-3.16012	1.83503e-08	8.51181e-08		-3.04412	1.65484e-07	3.69647e-07
O95299	1	0	0		2	0	0				O95299	8.17832	9.01658e-07	2.70892e-06		3.4378	5.55076e-05	0.000139924		-4.74052	0.00224205	0.00279934
O95336	1	1	1		4	2	5				O95336	9.57292	4.16827e-14	3.28281e-13		3.35647	1.45794e-09	8.14825e-09		-6.46508	5.95363e-11	2.05558e-10
O95340	0	1	1		0	4	8				O95340	3.5158	4.30309e-08	1.5968e-07		-2.31745	7.09849e-11	4.84084e-10		-4.64667	6.59802e-17	4.27315e-16
O95347	1	1	1		8	25	30				O95347	-0.5052	0.880088	0.91404		-3.11862	8.42997e-31	3.90146e-29		-2.92364	3.28232e-42	1.64877e-40
O95352	1	0	1		5	0	7				O95352	5.22909	2.07583e-11	1.19418e-10		0.772234	0.00480999	0.00796956		-4.58198	1.13165e-09	3.37774e-09
O95372	1	0	1		4	0	4				O95372	9.14137	9.88491e-14	7.38947e-13		2.80956	4.11515e-07	1.53814e-06		-3.82778	3.75666e-07	8.00086e-07
O95373	1	1	1		18	11	18				O95373	3.63953	3.56443e-29	1.03394e-27		0.0332016	1	1		-3.47556	1.13177e-26	1.67088e-25
O95376	1	0	1		3	0	3				O95376	5.67179	3.00046e-07	9.71213e-07		-0.114126	0.763518	0.817078		-5.78592	1.19315e-07	2.71675e-07
O95394	1	1	1		5	5	9				O95394	2.76559	0.00245685	0.00404143		1.02977	0.00657068	0.010531		-3.33302	1.2051e-14	6.29126e-14
O95433	1	1	1		8	8	9				O95433	1.29396	3.45892e-07	1.1096e-06		-1.28337	2.04215e-05	5.64916e-05		-2.65811	9.71986e-16	5.72763e-15
O95453	0	0	1		0	0	2				O95453	2.8197	0.0230708	0.0319102		-4.81281	0.0031136	0.00536832		-7.63251	3.05518e-09	8.55492e-09
O95456	0	0	1		0	0	2				O95456	0.467987	0.809103	0.848446		-2.34166	0.000908001	0.00174071		-2.80965	4.57295e-05	7.27539e-05
O95486	1	0	1		2	0	5				O95486	4.3539	6.39324e-09	2.65998e-08		-0.709474	0.115607	0.14589		-6.05125	4.85032e-14	2.36712e-13
O95487	0	0	1		0	0	2				O95487	8.37254	9.96887e-05	0.000206756		-2.71753	0.733642	0.789206		-11.0901	4.59128e-06	8.4691e-06
O95571	0	1	1		0	3	3				O95571	1.13807	0.414458	0.465291		-2.80209	6.86648e-05	0.000169461		-4.29657	3.16112e-08	7.89608e-08
O95573	0	0	1		0	0	2				O95573	2.36991	0.0265084	0.0363838		-0.436202	0.978132	1		-2.80611	9.46745e-05	0.000143898
O95602	0	0	1		0	0	3				O95602	2.4803	0.0210666	0.0293549		-1.48465	0.000512053	0.00104413		-3.99245	4.76505e-05	7.56931e-05
O95631	0	1	1		0	6	8				O95631	-1.90129	0.0643312	0.0829359		-4.02301	1.12994e-05	3.25697e-05		-1.96413	1.93357e-09	5.57731e-09
O95707	0	0	1		0	0	2				O95707	-2.79827	0.615363	0.667724		-5.66132	9.34475e-06	2.74348e-05		-2.86305	5.28132e-06	9.63835e-06
O95716	1	0	0		4	0	0				O95716	3.40973	2.57848e-07	8.44257e-07		3.80471	1.01788e-06	3.59268e-06		0.242915	0.902908	0.913106
O95747	1	1	1		3	3	4				O95747	1.15278	0.017058	0.0242282		-1.88878	0.00628062	0.0100936		-3.09035	4.84026e-08	1.17692e-07
O95757	1	1	1		9	4	9				O95757	4.811	1.58288e-15	1.46515e-14		1.6442	5.40062e-09	2.70622e-08		-2.09071	3.88186e-08	9.56875e-08
O95782	1	1	1		16	13	16				O95782	3.21123	1.12028e-23	2.21849e-22		0.802932	4.28157e-06	1.34727e-05		-2.7022	6.57537e-21	6.21192e-20
O95786	0	1	1		0	9	15				O95786	2.27312	5.06097e-06	1.34318e-05		-2.10248	1.088e-05	3.14932e-05		-4.09578	3.59136e-18	2.61819e-17
O95793	1	1	1		8	11	18				O95793	0.676342	0.0366972	0.0492203		-3.01886	2.39575e-23	6.20635e-22		-3.70189	1.3185e-31	2.87349e-30
O95810	0	1	1		0	3	4				O95810	0.0123356	0.997431	1		-3.38489	6.82023e-08	2.89614e-07		-3.47871	7.13686e-08	1.68753e-07
O95816	1	1	1		3	6	6				O95816	-1.84941	0.000452729	0.000843797		-2.92951	1.33238e-08	6.30338e-08		-1.50175	1.82011e-05	3.07633e-05
O95819	1	1	1		8	7	11				O95819	1.89049	0.00239021	0.00393812		-2.66075	7.49018e-12	5.77754e-11		-3.25985	6.52259e-17	4.23096e-16
O95831	1	1	1		7	7	9				O95831	1.71827	2.69433e-05	6.26648e-05		-1.27932	3.90394e-09	1.9931e-08		-2.86122	4.72776e-13	2.0477e-12
O95832	1	1	1		2	2	2				O95832	1.59339	0.00209307	0.00347776		-0.759201	0.00157629	0.0028831		-2.35259	0.000237028	0.000338959
O95834	1	1	1		5	3	2				O95834	8.02635	3.20345e-17	3.50001e-16		5.54618	2.90911e-09	1.52645e-08		-1.95542	7.39295e-07	1.51425e-06
O95858	0	0	1		0	0	2				O95858	-0.129521	0.63685	0.6885		-2.21905	0.00603912	0.00973586		-2.08953	3.44801e-05	5.61137e-05
O95861	1	0	1		3	0	3				O95861	5.07538	1.10914e-10	5.8949e-10		3.75803	1.33291e-08	6.30338e-08		-2.69356	2.55561e-05	4.24971e-05
O95865	1	1	1		4	6	6				O95865	4.97305	1.08922e-13	8.09834e-13		1.5992	9.98617e-09	4.83918e-08		-3.30242	5.3653e-12	2.08095e-11
O96000	0	0	1		0	0	3				O96000	1.6385	0.166906	0.200375		-2.94092	2.31631e-07	9.07792e-07		-4.57942	1.43997e-05	2.47238e-05
O96019	1	1	1		8	6	8				O96019	2.35126	5.62872e-10	2.76337e-09		-1.61406	3.89799e-10	2.36811e-09		-3.96532	3.26833e-17	2.16435e-16
P00338	1	1	1		14	15	16				P00338	0.233959	0.756976	0.801538		-3.05987	3.10533e-31	1.47021e-29		-3.12024	1.66239e-26	2.40259e-25
P00352	1	1	0		12	3	0				P00352	11.0257	1.04428e-31	3.61461e-30		7.2129	1.47275e-20	3.11091e-19		-2.49677	8.45144e-08	1.97792e-07
P00367	1	1	1		13	10	15				P00367	5.60052	1.51879e-28	4.25571e-27		1.51697	4.44174e-16	5.90179e-15		-4.14665	7.05652e-22	7.19626e-21
P00374	0	1	1		0	2	2				P00374	-1.44728	0.0271999	0.0372338		-3.34708	6.36768e-05	0.000158385		-1.89981	0.000493124	0.000670798
P00387	1	1	1		6	6	7				P00387	2.13734	1.21373e-08	4.84433e-08		-0.305549	0.511899	0.572188		-2.91777	1.38496e-11	5.15791e-11
P00390	1	0	1		2	0	3				P00390	3.4303	4.36526e-05	9.69299e-05		0.718624	0.313729	0.367534		-2.71167	0.0028204	0.0034918
P00403	0	1	1		0	2	2				P00403	-1.22213	0.0221898	0.030795		-4.71387	7.14569e-07	2.58412e-06		-3.49174	9.99994e-06	1.74978e-05
P00491	1	1	1		5	7	8				P00491	0.294778	0.905426	0.937047		-2.27695	3.03591e-09	1.58692e-08		-2.13302	1.13416e-12	4.7188e-12
P00492	1	1	1		6	7	7				P00492	4.11402	1.98973e-13	1.41062e-12		1.37552	1.79515e-07	7.14609e-07		-2.73341	7.6013e-10	2.31753e-09
P00505	1	1	1		13	8	13				P00505	6.09522	5.99355e-31	1.95932e-29		4.0214	5.78018e-17	8.68925e-16		-3.59221	5.30465e-20	4.6292e-19
P00533	1	1	1		14	16	18				P00533	-0.623724	0.00752974	0.0113817		-2.93638	2.42531e-27	7.92844e-26		-2.18985	9.25892e-21	8.66761e-20
P00558	1	1	1		26	18	28				P00558	5.16468	2.69597e-39	1.44217e-37		0.858862	0.0141223	0.0212459		-4.40514	8.24649e-43	4.24591e-41
P00568	1	1	1		9	7	10				P00568	5.45772	1.46538e-19	1.93459e-18		2.96733	1.23088e-13	1.21003e-12		-2.8711	1.07417e-07	2.45942e-07
P00736	1	1	1		3	5	6				P00736	-1.34064	0.000225594	0.000441227		-1.34068	0.00199643	0.00355988		-0.160161	0.860397	0.87247
P00749	0	1	1		0	8	8				P00749	-3.68693	2.15789e-09	9.60901e-09		-4.83779	2.05725e-12	1.71882e-11		-0.974111	1.24429e-05	2.15526e-05
P00750	1	1	1		3	7	7				P00750	-1.53861	1.58861e-06	4.57588e-06		-3.90151	4.95747e-11	3.45513e-10		-2.08589	1.50638e-07	3.37768e-07
P00966	1	1	1		10	7	3				P00966	5.61026	9.93866e-22	1.58672e-20		4.20145	2.20355e-06	7.3256e-06		-0.318801	0.829267	0.842771
P01023	1	1	1		3	8	6				P01023	-2.36807	2.59782e-07	8.49913e-07		-0.016984	0.999994	1		2.3451	8.47483e-07	1.72396e-06
P01024	1	1	1		25	32	25				P01024	-0.693602	0.00113319	0.00197613		0.450337	0.581168	0.64109		1.17562	7.62599e-11	2.60892e-10
P01031	1	1	0		2	2	0				P01031	3.0779	3.96643e-05	8.87438e-05		4.39494	0.00188996	0.00338909		1.31703	0.281474	0.296368
P01033	0	1	0		0	2	0				P01033	-2.9428	0.000708517	0.00127999		-0.639578	0.284252	0.33529		2.30322	5.80454e-05	9.11509e-05
P01034	1	1	1		2	3	3				P01034	-0.995391	0.0080599	0.0121075		-1.54263	0.00035296	0.000747862		-0.341932	0.363146	0.379548
P01040	0	1	0		0	3	0				P01040	-1.49761	0.00467981	0.00730988		-2.13818	0.00869263	0.0135985		-0.640573	0.0985774	0.106516
P01111	1	1	1		8	8	8				P01111	1.49625	1.77803e-08	6.93533e-08		-0.854405	0.000151638	0.000346806		-2.23984	6.84604e-13	2.9131e-12
P01112	0	0	1		0	0	2				P01112	3.38367	0.000345098	0.000652644		-0.466309	0.0501767	0.0676081		-3.84998	7.38637e-05	0.000114249
P01130	1	1	1		3	4	5				P01130	2.34895	0.00212975	0.00353158		-2.51063	3.84659e-06	1.22633e-05		-4.31593	9.84687e-11	3.31909e-10
P01189	1	0	0		3	0	0				P01189	7.90035	1.7898e-07	6.04278e-07		6.97707	3.03004e-08	1.36253e-07		-0.28191	0.69071	0.707896
P01857;P0DOX5	0	1	0		0	3	0				P01857;P0DOX5	1.12278	0.369381	0.418449		0.30174	0.631274	0.69118		-1.19152	0.194095	0.206958
P01876	0	1	0		0	3	0				P01876	-3.17204	0.005506	0.00851641		-1.31165	0.37939	0.436145		2.27985	0.179851	0.191969
P01889	1	1	1		9	12	13				P01889	-0.110966	0.999006	1		-3.20058	2.15647e-21	4.88049e-20		-3.28526	5.93538e-20	5.15777e-19
P01892	1	1	1		16	15	18				P01892	-0.350166	0.344929	0.393237		-2.94802	8.99714e-31	4.11769e-29		-2.82046	1.1583e-27	1.85643e-26
P02461	0	1	1		0	10	11				P02461	-2.527	3.38506e-08	1.27567e-07		-3.20785	9.73325e-12	7.38328e-11		-0.396396	0.430937	0.448353
P02511	1	0	0		2	0	0				P02511	9.48628	4.25378e-05	9.46587e-05		0.968216	0.000823276	0.00160153		-2.49231	0.373126	0.38978
P02533	1	1	1		29	34	33				P02533	-1.27144	4.66811e-10	2.30828e-09		-0.73922	0.250196	0.298452		0.501577	0.869642	0.880978
P02538	1	1	1		28	32	32				P02538	-1.445	1.93022e-09	8.67966e-09		-1.05938	0.27068	0.320659		0.252115	0.999976	1
P02545	1	1	1		29	37	38				P02545	-1.22579	2.20679e-12	1.40709e-11		-2.12988	4.79924e-33	2.60106e-31		-0.874693	2.19306e-14	1.10565e-13
P02649	1	1	1		3	5	3				P02649	0.617868	0.0412496	0.0548087		0.348243	0.502022	0.562521		0.150542	0.924163	0.933684
P02675	1	0	0		2	0	0				P02675	6.62316	2.33143e-06	6.5018e-06		4.54053	0.000184579	0.000414129		-2.08263	0.359454	0.375785
P02748	1	0	0		2	0	0				P02748	3.59594	2.95521e-06	8.12585e-06		2.81757	4.41796e-05	0.000113563		-0.778367	0.268418	0.283056
P02751	1	1	1		68	83	84				P02751	-3.75446	1.47928e-120	1.52329e-117		-4.24568	2.33075e-137	4.80018e-134		-0.615903	9.74481e-09	2.58627e-08
P02768	1	1	1		7	11	7				P02768	-1.61878	0.697635	0.745604		0.264875	0.982044	1		1.51896	0.0244529	0.0276176
P02786	1	1	1		15	26	28				P02786	-1.50081	5.88883e-19	7.41776e-18		-3.85693	9.14959e-50	1.29956e-47		-2.14563	2.83434e-32	6.74835e-31
P02787	1	0	0		10	0	0				P02787	10.8479	2.63379e-19	3.40081e-18		6.73577	9.06673e-10	5.24521e-09		-3.32064	0.0572036	0.0629163
P02788	0	1	1		0	6	4				P02788	-0.921139	0.0960157	0.119519		0.0400895	0.999995	1		1.16725	0.0134896	0.015564
P02794	1	0	0		4	0	0				P02794	9.18435	2.17572e-12	1.38943e-11		6.45688	3.27547e-09	1.69281e-08		-3.404	2.86973e-06	5.41972e-06
P04004	0	1	1		0	4	5				P04004	-1.04373	0.081621	0.102844		-4.42478	1.90947e-08	8.8372e-08		-4.04101	3.46135e-10	1.08834e-09
P04040	1	1	1		4	8	8				P04040	-2.15867	2.64084e-07	8.62619e-07		-1.57898	0.0564156	0.0754712		0.194533	0.979089	0.983146
P04062	1	1	1		7	10	10				P04062	-0.804277	0.163226	0.196185		-3.31266	5.43549e-14	5.54178e-13		-2.67883	1.37459e-13	6.4049e-13
P04066	1	0	0		4	0	0				P04066	10.9181	2.27266e-16	2.26661e-15		6.98201	3.2128e-09	1.66669e-08		-2.98513	0.0032335	0.00397933
P04075	1	1	1		22	23	23				P04075	3.07278	1.1342e-29	3.33698e-28		0.0567975	0.999956	1		-3.36561	1.54123e-35	4.6338e-34
P04080	0	0	1		0	0	2				P04080	1.73218	0.217464	0.256364		-3.15387	4.74346e-05	0.000121206		-4.88605	0.000847837	0.00111859
P04083	1	1	1		15	23	23				P04083	-2.44031	1.70811e-23	3.30315e-22		-5.70602	7.66564e-55	1.43522e-52		-3.15861	1.32965e-34	3.72575e-33
P04114	0	1	0		0	4	0				P04114	-0.901112	0.0790032	0.0998509		-0.766026	0.686452	0.744078		0.135087	0.850309	0.863517
P04150	0	0	1		0	0	3				P04150	-0.628252	0.707874	0.755567		-2.37661	0.016013	0.023915		-1.74836	0.000322471	0.000451482
P04156	1	1	1		4	3	5				P04156	0.393348	0.49622	0.551073		-4.76062	2.63611e-11	1.9016e-10		-3.78643	1.452e-14	7.52303e-14
P04179	0	0	1		0	0	3				P04179	5.47443	0.00228097	0.00376565		-0.454984	0.948715	0.982813		-5.34948	0.00188737	0.00238176
P04181	1	1	1		12	7	13				P04181	4.12755	1.1006e-13	8.16827e-13		-0.717912	0.232595	0.279317		-5.60518	1.1317e-18	8.64838e-18
P04183	0	0	1		0	0	3				P04183	1.01981	0.0573956	0.0746487		-2.23621	0.000106741	0.000253848		-2.41061	7.88647e-05	0.000121392
P04216	0	0	1		0	0	3				P04216	1.98224	0.0142451	0.0205159		-2.98344	0.000541086	0.0010952		-4.74594	4.47544e-05	7.13955e-05
P04259	1	1	1		4	5	5				P04259	-1.46994	0.183027	0.218138		-1.41414	0.317667	0.371725		-0.103473	0.998212	0.999911
P04264	1	1	1		40	43	41				P04264	-1.31311	9.12125e-15	7.85992e-14		-0.701951	0.11145	0.141076		0.610625	0.637989	0.655658
P04350	1	0	1		2	0	2				P04350	10.5888	3.65319e-08	1.36671e-07		3.32691	4.88782e-06	1.52069e-05		-7.26189	9.77058e-06	1.71474e-05
P04406	1	1	1		19	21	21				P04406	0.295675	0.567818	0.621042		-1.78321	5.94587e-07	2.16543e-06		-2.01694	9.20697e-19	7.07528e-18
P04424	1	0	1		8	0	4				P04424	7.236	1.50053e-14	1.25115e-13		4.48309	2.88551e-07	1.10768e-06		-1.51895	0.00195954	0.0024683
P04626	0	0	1		0	0	2				P04626	0.320706	0.66862	0.719447		-2.66814	0.00072405	0.00142765		-2.98885	7.43774e-05	0.000114914
P04632	1	1	1		5	5	5				P04632	3.26583	2.86889e-10	1.44993e-09		-0.0373733	0.992468	1		-3.30636	1.93241e-10	6.2872e-10
P04637	1	1	1		3	6	7				P04637	-2.12973	0.000295385	0.000567222		-3.69274	1.8288e-06	6.17951e-06		-1.74104	6.26716e-07	1.29721e-06
P04792	1	1	1		11	11	14				P04792	3.0496	2.31744e-17	2.57292e-16		-0.528676	0.4649	0.523725		-2.90107	3.86574e-19	3.05038e-18
P04843	1	1	1		12	11	17				P04843	2.11789	0.000318879	0.000608085		-1.79171	0.0234088	0.0338556		-2.72974	5.0905e-22	5.26828e-21
P04844	1	1	1		6	7	9				P04844	3.82684	5.28134e-14	4.11225e-13		0.206542	0.873845	0.917972		-3.03021	1.79624e-12	7.28936e-12
P04899	1	1	1		10	9	10				P04899	2.43349	1.04245e-12	6.84823e-12		-0.479218	0.000901515	0.00173116		-2.65401	5.22035e-15	2.85839e-14
P05023	1	1	1		27	27	28				P05023	0.583583	0.0720695	0.0919053		-1.6602	4.41088e-28	1.56176e-26		-2.22012	8.93233e-26	1.23464e-24
P05026	1	1	1		5	5	5				P05026	2.91242	3.55006e-10	1.7703e-09		0.338945	0.105751	0.134649		-2.41092	5.88435e-10	1.81419e-09
P05067	1	1	1		5	7	8				P05067	-1.41622	4.93626e-05	0.000108613		-1.72206	2.3464e-07	9.18708e-07		0.335727	0.486456	0.504459
P05089	1	1	1		6	8	8				P05089	-1.89207	1.65357e-05	4.01595e-05		-0.686395	0.563089	0.623652		1.11241	0.0663313	0.072491
P05091	1	1	1		13	3	10				P05091	8.2358	6.7295e-30	2.05325e-28		6.16908	1.06411e-30	4.76419e-29		-2.76237	1.41913e-10	4.69511e-10
P05106	0	1	1		0	6	5				P05106	-2.84683	1.41466e-06	4.11219e-06		-1.97161	1.09366e-05	3.16126e-05		-0.169239	0.532312	0.549798
P05114	0	1	0		0	3	0				P05114	-2.48903	0.00168922	0.00286216		1.48671	0.0532812	0.0715337		3.27296	0.00184459	0.00233063
P05120	0	1	0		0	2	0				P05120	-3.6053	0.00205775	0.0034246		-0.0163619	0.882229	0.926307		3.58894	0.0546204	0.0601394
P05121	1	1	1		14	10	13				P05121	1.69723	5.77897e-14	4.46596e-13		-0.417735	0.0448372	0.0609319		-2.02218	1.02954e-17	7.16331e-17
P05141	1	1	1		2	2	3				P05141	1.96998	2.15478e-06	6.0419e-06		-0.395305	0.0941704	0.121026		-2.57587	4.51197e-07	9.48689e-07
P05161	0	0	1		0	0	2				P05161	4.5223	2.13205e-06	5.98224e-06		-2.21425	0.424489	0.482737		-6.73655	0.000349337	0.000486943
P05165	1	0	0		12	0	0				P05165	6.65967	4.75506e-24	9.64833e-23		4.09182	3.82695e-13	3.53436e-12		-2.3436	1.41121e-06	2.77328e-06
P05166	1	0	0		11	0	0				P05166	8.26554	2.4401e-21	3.79275e-20		4.03759	6.0262e-15	6.99209e-14		-4.3995	5.79175e-09	1.57363e-08
P05187	0	1	1		0	3	3				P05187	0.192325	0.757737	0.802138		-1.89884	0.000136157	0.000315429		-2.09116	2.17615e-06	4.16962e-06
P05198	1	1	1		13	12	13				P05198	2.02062	6.0849e-10	2.97669e-09		-0.976389	1.94053e-05	5.4007e-05		-3.06362	1.12143e-17	7.75027e-17
P05362	1	1	1		7	8	8				P05362	-0.542907	0.120696	0.147872		-3.1338	6.20822e-16	8.03789e-15		-2.65371	1.23919e-13	5.81346e-13
P05386	0	1	1		0	2	2				P05386	0.165264	0.798455	0.838775		-3.50929	7.72599e-05	0.000188751		-3.67455	7.24565e-06	1.2993e-05
P05387	1	1	1		4	6	8				P05387	-0.296159	0.500499	0.555526		-3.11244	1.65381e-13	1.59533e-12		-2.94623	8.26507e-14	3.95399e-13
P05388	1	1	1		13	14	14				P05388	1.02446	3.65985e-05	8.29106e-05		-1.60352	5.63506e-17	8.50213e-16		-2.70367	1.31736e-17	9.04367e-17
P05455	1	1	1		14	13	24				P05455	2.31047	7.60131e-16	7.24764e-15		-1.11247	7.97666e-12	6.10704e-11		-3.27955	2.44062e-28	4.24174e-27
P05556	1	1	1		15	16	16				P05556	-0.600846	0.00348413	0.00557759		-3.97121	2.27804e-35	1.44358e-33		-3.22362	5.59246e-27	8.46888e-26
P05783	1	1	1		12	16	21				P05783	-0.309807	0.508534	0.563989		-2.53136	1.58959e-25	4.74459e-24		-2.22354	2.07116e-22	2.21013e-21
P05787	1	1	1		23	27	28				P05787	0.142964	0.999962	1		-2.90337	3.21212e-36	2.16897e-34		-2.28723	6.02786e-33	1.56156e-31
P05997	0	1	1		0	14	15				P05997	-2.57077	2.77053e-11	1.57404e-10		-3.74867	7.88201e-19	1.43655e-17		-1.91517	2.83577e-05	4.6797e-05
P06132	1	0	1		3	0	4				P06132	3.75287	1.08951e-06	3.22854e-06		1.67862	0.000488564	0.00100219		-3.36514	4.8028e-09	1.31447e-08
P06241	1	0	1		2	0	2				P06241	3.33644	0.0013358	0.00229831		-0.398003	0.170153	0.209212		-3.73444	0.00053998	0.000730916
P06280	0	1	1		0	5	6				P06280	0.405867	0.566046	0.619267		-4.85363	8.83494e-13	7.74279e-12		-4.38109	2.98454e-15	1.69329e-14
P06396	1	1	1		12	16	16				P06396	-0.213223	0.999974	1		-1.92756	9.78171e-09	4.75689e-08		-1.36922	5.28483e-14	2.56096e-13
P06493	1	1	1		11	9	11				P06493	1.41317	2.50838e-05	5.8701e-05		-2.74143	1.99201e-16	2.78138e-15		-4.02197	4.85008e-20	4.25959e-19
P06576	1	1	1		25	24	25				P06576	7.27883	1.23279e-62	3.90606e-60		4.08507	1.75372e-53	2.88943e-51		-3.39801	6.59369e-36	2.17275e-34
P06702	0	1	1		0	2	2				P06702	1.20681	0.943626	0.970001		-1.85283	0.11059	0.140203		-3.05963	0.240184	0.254062
P06703	1	1	1		2	3	3				P06703	-1.45719	0.00352361	0.00563422		-5.19901	3.64707e-08	1.61011e-07		-3.38021	1.29844e-07	2.94385e-07
P06730	1	1	1		4	3	4				P06730	6.74268	1.83147e-06	5.20517e-06		-0.243047	0.683584	0.741945		-6.84951	1.66038e-06	3.23056e-06
P06733	1	1	1		30	27	30				P06733	1.85587	1.87212e-05	4.4859e-05		-2.53617	1.4889e-31	7.13114e-30		-4.43166	1.77286e-51	1.40431e-49
P06737	1	1	1		20	16	23				P06737	5.66653	4.17314e-44	3.508e-42		2.0837	3.5179e-17	5.48873e-16		-3.58291	3.71166e-32	8.63747e-31
P06744	1	1	1		13	13	17				P06744	3.17229	1.4134e-14	1.18089e-13		-2.95833	9.51947e-29	3.56461e-27		-4.45973	1.45461e-32	3.5664e-31
P06748	1	1	1		9	12	12				P06748	-0.815794	0.000223718	0.000437972		-2.80268	6.86234e-16	8.8056e-15		-1.24557	1.03645e-08	2.74542e-08
P06753	1	1	1		6	5	6				P06753	3.3205	2.20756e-08	8.52195e-08		-0.481816	0.148986	0.184674		-3.71349	1.75714e-09	5.10054e-09
P06756	1	1	1		12	14	16				P06756	0.35244	0.321815	0.369018		-2.30828	2.05741e-18	3.60616e-17		-2.84179	7.89305e-24	9.28899e-23
P06865	0	1	1		0	6	8				P06865	1.91366	0.0188912	0.0266027		-2.31395	0.290604	0.342097		-3.58469	4.08247e-14	2.00425e-13
P06899;P23527;P33778;Q16778	1	1	1		2	2	2				P06899;P23527;P33778;Q16778	-3.20154	0.000145439	0.000293803		-4.56549	4.42624e-06	1.38855e-05		-1.36395	0.000139621	0.000206424
P07093	1	1	1		14	14	16				P07093	-0.951854	6.67087e-06	1.73464e-05		-2.38247	3.66326e-17	5.69396e-16		-1.63644	1.52748e-08	3.95558e-08
P07099	1	1	1		3	4	6				P07099	5.45384	1.22922e-05	3.04459e-05		-0.621603	0.693797	0.750657		-4.01221	1.47321e-05	2.52525e-05
P07195	1	1	1		15	15	17				P07195	3.18468	1.06631e-10	5.67459e-10		0.877351	0.000903584	0.00173352		-3.65182	6.8148e-25	8.8271e-24
P07196	1	0	0		14	0	0				P07196	9.0857	1.01491e-21	1.61406e-20		5.91883	5.40362e-28	1.88623e-26		-1.85179	0.00250162	0.00311211
P07197	1	0	0		12	0	0				P07197	7.8054	1.96981e-20	2.81723e-19		4.28697	1.81082e-17	2.93652e-16		-3.42064	3.36102e-06	6.29275e-06
P07203	1	0	1		3	0	3				P07203	2.85977	0.00104954	0.00184588		0.392226	0.767049	0.820643		-2.26796	0.0639934	0.0700475
P07225	0	1	1		0	2	2				P07225	-0.561884	0.931036	0.959638		-2.32277	0.0143534	0.0215537		-1.76088	0.00327534	0.0040272
P07237	1	1	1		22	20	25				P07237	2.66142	4.1538e-24	8.55474e-23		-0.424748	0.0518719	0.0698025		-3.15162	1.42214e-36	5.00665e-35
P07305	1	1	1		2	3	3				P07305	-0.262786	0.533993	0.588264		-4.52942	6.52106e-11	4.46926e-10		-4.70099	3.12257e-10	9.87098e-10
P07339	1	1	1		8	13	14				P07339	-0.14406	0.997401	1		-2.25252	4.23355e-10	2.54591e-09		-2.40075	4.80131e-18	3.4454e-17
P07355	1	1	1		25	31	34				P07355	-2.27416	5.93464e-36	2.60051e-34		-5.61308	2.35608e-86	8.82245e-84		-3.177	7.34286e-53	6.30109e-51
P07384	1	1	1		14	15	18				P07384	3.92873	2.40085e-23	4.55719e-22		1.36806	7.80178e-17	1.16013e-15		-2.44471	6.78069e-20	5.83889e-19
P07437	1	1	1		5	5	5				P07437	2.87845	1.044e-08	4.19537e-08		-0.771868	0.00133636	0.0024818		-3.66104	9.48762e-11	3.2085e-10
P07602	0	1	1		0	3	4				P07602	0.332135	0.718863	0.765907		-3.04908	2.46374e-05	6.69846e-05		-2.48495	2.27196e-06	4.33049e-06
P07686	1	1	1		5	14	18				P07686	1.44561	0.0138942	0.0200667		-4.08624	9.40352e-19	1.69882e-17		-4.60666	1.47906e-36	5.16294e-35
P07711	0	0	1		0	0	3				P07711	2.28917	0.010668	0.0156822		-1.27526	0.00417662	0.00700468		-3.64155	0.00306038	0.00377869
P07737	1	1	1		8	9	10				P07737	0.684188	0.518522	0.573521		-3.49228	3.3923e-14	3.52851e-13		-3.53708	4.30825e-20	3.79994e-19
P07741	1	1	1		4	4	5				P07741	1.82653	0.000377724	0.000709611		-1.40646	2.19462e-06	7.30181e-06		-3.4002	1.46561e-10	4.8411e-10
P07814	1	1	1		35	35	44				P07814	3.35942	1.58894e-57	3.63602e-55		-0.129462	0.998865	1		-3.64035	4.39443e-67	7.86985e-65
P07858	0	0	1		0	0	4				P07858	1.26242	0.469805	0.523573		-2.84179	3.36996e-08	1.50388e-07		-2.58625	0.000608893	0.00081828
P07900	1	1	1		23	19	23				P07900	2.47427	3.43367e-27	8.52004e-26		0.107005	0.992282	1		-2.11713	9.93249e-25	1.26271e-23
P07910	1	1	1		13	14	16				P07910	-0.795063	1.88364e-05	4.51088e-05		-3.61827	5.8543e-29	2.21228e-27		-2.99422	2.36298e-21	2.31191e-20
P07942	1	1	1		35	53	48				P07942	-2.88138	5.88824e-62	1.73241e-59		-1.92615	1.57172e-37	1.11619e-35		1.01728	4.84989e-17	3.181e-16
P07947	1	1	1		6	5	6				P07947	1.55461	3.83127e-06	1.03618e-05		-1.25755	0.00110072	0.0020788		-2.91343	2.76801e-10	8.77708e-10
P07948	0	1	1		0	6	6				P07948	0.93876	0.114766	0.141238		-1.51176	6.57045e-06	1.98124e-05		-2.15243	3.55078e-09	9.86222e-09
P07951	1	1	1		10	7	11				P07951	2.07032	1.48276e-09	6.79364e-09		-0.68942	2.92924e-05	7.80436e-05		-2.75974	4.73012e-18	3.40618e-17
P07954	1	1	1		8	7	8				P07954	4.50035	2.39023e-18	2.8872e-17		1.7989	1.11188e-11	8.37265e-11		-2.96596	1.00543e-13	4.76568e-13
P07996	1	1	1		28	30	28				P07996	-0.565047	0.0941908	0.117496		-0.804515	1.6131e-09	8.94263e-09		-0.379497	0.184665	0.197056
P08069	0	1	1		0	4	5				P08069	0.984282	0.000816071	0.00145894		-1.26246	1.62598e-05	4.57473e-05		-2.39088	2.431e-08	6.14313e-08
P08133	1	1	1		36	43	44				P08133	0.480816	0.999385	1		-2.60621	2.00856e-47	2.36378e-45		-3.00393	2.42869e-55	2.27358e-53
P08195	1	1	1		21	24	25				P08195	-0.474746	0.0888692	0.111296		-2.60624	3.29818e-31	1.54378e-29		-2.03145	3.89257e-29	7.12599e-28
P08237	1	1	1		16	7	16				P08237	6.52283	1.49233e-30	4.69229e-29		1.83189	4.14574e-16	5.54426e-15		-5.36246	1.65438e-27	2.63104e-26
P08238	1	1	1		44	41	44				P08238	2.37348	1.69043e-50	2.32096e-48		0.0217984	1	1		-2.44225	8.40209e-53	7.0629e-51
P08240	1	0	1		10	0	8				P08240	8.97277	1.58549e-18	1.94364e-17		2.89461	1.67049e-12	1.40711e-11		-4.51723	3.90483e-13	1.71837e-12
P08243	1	1	1		10	3	7				P08243	9.74746	2.78866e-19	3.58953e-18		4.11496	4.4892e-14	4.59975e-13		-4.10398	1.85671e-12	7.52736e-12
P08247	1	0	0		2	0	0				P08247	12.4757	1.77061e-10	9.18532e-10		6.29362	4.27596e-08	1.87568e-07		-6.18205	1.82724e-08	4.67188e-08
P08253	0	1	1		0	2	2				P08253	-0.54234	0.419674	0.47089		-2.02489	0.00529001	0.00865351		-1.48255	0.000390864	0.000541348
P08397	1	0	0		2	0	0				P08397	9.90546	4.0842e-06	1.10025e-05		7.35197	1.53148e-09	8.52456e-09		-2.55349	0.0664898	0.0726449
P08473	0	0	1		0	0	3				P08473	2.7028	0.195545	0.232185		-2.77247	0.0672351	0.0888487		-4.37942	0.000391041	0.000541412
P08559	1	1	1		15	5	13				P08559	9.21106	1.83273e-26	4.3636e-25		2.79548	4.71932e-20	9.43634e-19		-5.37657	3.97623e-18	2.88855e-17
P08572	1	1	1		3	11	13				P08572	-4.90475	3.19272e-11	1.80643e-10		-3.75075	2.60613e-20	5.31418e-19		0.447	0.0340898	0.0380944
P08579	1	1	1		5	5	6				P08579	0.230389	0.967487	0.990082		-2.03419	2.10145e-06	7.01447e-06		-2.28759	4.64532e-08	1.13086e-07
P08621	1	1	1		15	14	18				P08621	-0.133302	0.989983	1		-4.54571	4.72922e-34	2.82314e-32		-3.87731	1.99453e-35	5.8682e-34
P08648	1	1	1		9	10	11				P08648	-0.79073	0.00838884	0.0125695		-3.54293	1.64313e-16	2.33381e-15		-2.59521	5.98944e-16	3.57543e-15
P08670	1	1	1		40	37	41				P08670	2.33917	7.65469e-37	3.42714e-35		-0.0125733	1	1		-2.67489	7.30754e-48	4.8548e-46
P08708	1	1	1		8	8	8				P08708	0.284989	0.700747	0.748542		-1.39517	8.95492e-05	0.000216209		-2.09446	3.61715e-08	8.98075e-08
P08727	1	1	1		3	4	3				P08727	0.305077	0.539827	0.593896		0.179663	0.960908	0.993469		-0.220505	0.905631	0.915635
P08754	1	1	1		6	5	6				P08754	2.49129	4.64349e-07	1.46451e-06		-0.358369	0.0684009	0.0901579		-3.26164	3.99331e-08	9.82583e-08
P08758	1	1	1		14	22	22				P08758	-1.83802	1.07057e-08	4.29377e-08		-5.17579	2.44882e-43	2.46017e-41		-3.79382	4.78038e-32	1.1062e-30
P08779	1	1	1		17	17	17				P08779	-0.956935	0.0687982	0.0880062		0.0652543	1	1		0.919099	0.0572191	0.0629165
P08865	1	1	1		9	9	9				P08865	6.13106	1.16841e-16	1.20618e-15		0.108754	0.992541	1		-4.00501	5.1108e-18	3.66111e-17
P08962	0	1	1		0	3	3				P08962	-1.33102	0.102207	0.126537		-1.9852	0.0100387	0.015545		-0.654183	0.12064	0.129641
P09012	1	1	1		6	10	12				P09012	-0.264566	0.837646	0.874813		-4.50196	1.61925e-20	3.38563e-19		-4.64579	8.2377e-24	9.66698e-23
P09038	1	1	1		3	2	3				P09038	2.04989	0.00013744	0.0002786		0.0822027	0.940469	0.977736		-1.96769	0.000772854	0.00102426
P09104	1	1	1		5	4	6				P09104	2.94124	9.33001e-08	3.29647e-07		-1.43259	0.00194528	0.00348072		-3.57601	3.86336e-12	1.53602e-11
P09110	1	0	0		4	0	0				P09110	4.10251	8.44913e-09	3.44574e-08		3.71585	5.00981e-07	1.8557e-06		-1.5144	0.00538672	0.00645748
P09132	1	0	1		3	0	3				P09132	2.72266	0.012478	0.0181614		-3.61627	0.00993345	0.0153935		-6.33893	1.62838e-08	4.19994e-08
P09211	1	1	1		9	8	9				P09211	3.31676	4.44908e-11	2.47311e-10		-1.11346	0.00549673	0.00895965		-3.07654	1.09785e-16	7.0218e-16
P09382	1	1	1		5	5	6				P09382	1.37968	0.0010719	0.00188199		-2.50974	1.97898e-07	7.8379e-07		-3.96083	7.65571e-11	2.61692e-10
P09417	1	0	1		2	0	4				P09417	6.08783	2.34857e-10	1.19725e-09		0.626195	0.000109901	0.000260461		-5.68742	1.03356e-10	3.46963e-10
P09429	1	1	1		11	11	11				P09429	1.36093	7.85171e-07	2.37628e-06		-0.441678	0.0164761	0.0245266		-1.63235	3.87059e-12	1.53741e-11
P09467	1	0	0		3	0	0				P09467	8.47567	8.01233e-11	4.33108e-10		9.20674	1.5638e-05	4.41485e-05		-1.78743	0.195454	0.208245
P09471	1	0	0		10	0	0				P09471	9.85398	1.32757e-16	1.36027e-15		6.36905	2.09461e-15	2.53012e-14		-3.25584	0.00275544	0.00341548
P09486	0	1	1		0	2	3				P09486	-0.512514	0.788579	0.829246		-3.97373	0.00524148	0.00859461		-2.77285	8.82624e-06	1.56434e-05
P09488	1	1	0		2	2	0				P09488	4.58903	0.0012868	0.00222423		4.86764	0.000101357	0.000241741		0.278606	0.522176	0.53987
P09496	1	1	1		3	3	5				P09496	1.20958	0.778324	0.821161		-2.53272	4.5675e-05	0.000117072		-3.206	2.97508e-09	8.33628e-09
P09497	1	1	1		4	4	3				P09497	5.89727	1.01228e-08	4.08702e-08		1.93329	0.00112115	0.00210965		-4.08034	7.68301e-06	1.37116e-05
P09525	1	1	1		16	16	19				P09525	1.05276	0.00967348	0.0143587		-2.55931	2.22063e-28	8.0945e-27		-3.53588	9.5738e-31	1.98163e-29
P09543	1	1	1		15	18	19				P09543	0.300424	0.553303	0.606939		-2.63992	9.97609e-30	4.10915e-28		-3.4088	1.08253e-28	1.91371e-27
P09622	1	1	1		8	4	7				P09622	7.38959	7.65581e-17	8.06503e-16		3.53728	1.14989e-15	1.43093e-14		-3.55232	5.28239e-10	1.63595e-09
P09651	1	1	1		14	13	15				P09651	1.25568	4.81064e-08	1.77395e-07		-0.85524	2.17974e-10	1.39199e-09		-2.79177	1.25365e-21	1.25031e-20
P09661	1	1	1		11	10	13				P09661	0.163464	0.950724	0.976024		-2.52165	7.2492e-20	1.42868e-18		-2.88679	3.64851e-20	3.23187e-19
P09668	0	1	1		0	5	6				P09668	-0.274518	0.93605	0.963416		-3.39227	1.04897e-08	5.06528e-08		-3.2625	6.35594e-11	2.18897e-10
P09758	0	1	1		0	2	3				P09758	-4.37104	0.0644031	0.0830026		-5.87356	0.00962603	0.0149396		-2.7177	2.01351e-07	4.45655e-07
P09871	1	1	1		3	6	6				P09871	-3.40265	6.11438e-05	0.000131424		-2.35425	1.1699e-05	3.36276e-05		1.07586	0.0035803	0.00438646
P09874	1	1	1		24	32	35				P09874	-0.445936	0.118362	0.145315		-2.97934	1.91898e-46	2.13629e-44		-2.68892	4.20358e-43	2.21981e-41
P09884	0	0	1		0	0	2				P09884	2.77531	0.00871431	0.0130382		-1.82083	0.228854	0.275226		-4.59614	6.42967e-07	1.32884e-06
P09913	0	1	1		0	9	9				P09913	-0.967834	0.13235	0.161001		-3.55298	9.67383e-10	5.57498e-09		-3.5832	8.29352e-15	4.44805e-14
P09914	1	1	1		2	7	13				P09914	0.0571865	0.99999	1		-4.42739	3.57404e-16	4.82671e-15		-3.31939	2.65446e-22	2.79635e-21
P09936	1	1	1		10	7	9				P09936	7.67413	4.72305e-21	7.17869e-20		4.72455	2.32985e-20	4.79833e-19		-3.8034	4.18301e-13	1.82713e-12
P09960	1	1	1		13	7	12				P09960	6.53303	2.11412e-22	3.56887e-21		3.72976	2.41284e-32	1.25804e-30		-3.38881	7.7567e-16	4.61703e-15
P09972	1	1	1		13	4	11				P09972	6.94597	2.40851e-28	6.52674e-27		3.97304	8.43862e-16	1.06673e-14		-3.36581	6.36423e-14	3.06959e-13
P0C0L4	1	1	1		2	2	2				P0C0L4	1.175	0.0104075	0.0153266		3.98502	2.71667e-06	8.86686e-06		2.81002	3.80018e-05	6.1216e-05
P0C0S5;Q71UI9	1	1	1		4	3	4				P0C0S5;Q71UI9	3.87889	0.00610245	0.00935467		-3.3431	1.73215e-06	5.86736e-06		-6.36421	3.5401e-07	7.59067e-07
P0DJI9	1	0	0		4	0	0				P0DJI9	9.03473	3.2064e-10	1.60671e-09		6.45777	1.40994e-08	6.63721e-08		-2.87306	0.00851615	0.0100223
P0DMM9;P0DMN0	0	0	1		0	0	3				P0DMM9;P0DMN0	0.879585	0.541499	0.595258		-2.18934	0.000828533	0.00160978		-4.49044	7.11565e-07	1.46108e-06
P0DMV8;P0DMV9	1	1	1		33	29	35				P0DMV8;P0DMV9	2.97434	1.0165e-43	8.37394e-42		-0.801774	2.16918e-16	2.99827e-15		-3.94901	9.23208e-62	1.26756e-59
P0DN76;Q01081	1	1	1		3	3	3				P0DN76;Q01081	0.868318	0.261826	0.304994		-4.28153	2.16096e-08	9.94526e-08		-5.05606	7.59404e-09	2.0391e-08
P0DN79;P35520	1	0	0		2	0	0				P0DN79;P35520	13.6146	1.58928e-11	9.22008e-11		7.47969	6.89051e-06	2.06715e-05		-6.13491	8.02911e-07	1.64129e-06
P0DP23;P0DP24;P0DP25	1	1	1		2	2	2				P0DP23;P0DP24;P0DP25	0.517639	0.0438287	0.0580111		-0.92496	0.404795	0.462638		-1.4426	0.00191356	0.0024126
P10155	1	1	1		3	5	5				P10155	1.44422	0.0142877	0.0205644		-0.496915	0.5931	0.652679		-1.94113	2.58122e-07	5.64933e-07
P10253	0	1	1		0	5	12				P10253	3.45281	0.00280507	0.00456143		-4.14326	3.8352e-17	5.91655e-16		-7.2761	3.01614e-15	1.70887e-14
P10301	1	1	1		7	7	8				P10301	3.02562	1.13911e-12	7.4713e-12		-0.0218288	0.999979	1		-3.29261	3.74446e-13	1.64956e-12
P10412	1	1	1		9	10	11				P10412	-1.16056	7.7332e-06	1.98709e-05		-5.97261	9.92239e-25	2.87819e-23		-4.26712	2.02844e-21	1.99406e-20
P10515	1	1	1		8	3	5				P10515	5.78892	2.67663e-16	2.65664e-15		3.59161	1.96749e-10	1.26232e-09		-2.66253	3.25504e-06	6.10264e-06
P10586	1	1	1		9	6	11				P10586	1.34185	3.47723e-07	1.11461e-06		-1.95435	5.28954e-10	3.1485e-09		-4.67182	1.68374e-19	1.38707e-18
P10599	1	1	1		3	3	3				P10599	0.277663	0.661969	0.713036		-1.05604	0.0318861	0.0446882		-2.08515	2.60104e-05	4.3183e-05
P10619	1	1	1		2	5	7				P10619	-3.01488	3.0799e-05	7.09378e-05		-5.83754	8.06202e-08	3.38506e-07		-3.33077	1.92041e-14	9.81411e-14
P10644	1	1	1		10	10	11				P10644	2.27294	9.44211e-12	5.63653e-11		-0.895479	0.000262427	0.000569214		-3.1335	4.94771e-16	2.97948e-15
P10645	1	0	0		2	0	0				P10645	7.26915	2.93342e-07	9.52149e-07		5.69893	0.00013709	0.000317411		-1.57022	0.223567	0.237277
P10646	1	1	1		2	2	3				P10646	3.07437	5.30883e-07	1.65035e-06		-3.67998	8.76786e-09	4.29582e-08		-6.60878	1.33018e-10	4.42214e-10
P10768	1	0	1		2	0	3				P10768	3.87787	0.0391759	0.0523065		-3.15005	2.07064e-07	8.18517e-07		-6.77057	3.1878e-05	5.21261e-05
P10809	1	1	1		24	23	23				P10809	3.72412	7.88863e-39	4.06166e-37		2.02181	1.78781e-29	7.2196e-28		-1.55023	1.35516e-19	1.12538e-18
P10909	1	1	1		16	17	19				P10909	0.921664	0.0631992	0.0815531		-2.80089	1.17673e-27	3.97291e-26		-3.53656	5.53645e-32	1.26692e-30
P11021	1	1	1		30	26	30				P11021	2.62729	4.67548e-43	3.56635e-41		0.657018	1.87531e-09	1.02445e-08		-2.03737	6.3391e-38	2.37371e-36
P11047	1	1	1		38	59	49				P11047	-2.65516	1.72185e-67	5.91026e-65		-1.75094	3.29571e-47	3.77085e-45		0.999653	1.96627e-15	1.13432e-14
P11117	0	0	1		0	0	2				P11117	1.55688	0.318393	0.365411		-4.244	0.000805589	0.00157113		-5.80088	0.00740853	0.00878151
P11137	1	0	0		3	0	0				P11137	4.88018	7.84583e-06	2.01352e-05		0.538839	0.318096	0.372016		-3.18683	0.00412643	0.00502566
P11142	1	1	1		33	32	35				P11142	2.8659	5.74307e-46	5.63231e-44		-1.27994	5.64079e-29	2.15133e-27		-4.08573	8.51369e-66	1.40272e-63
P11166	1	1	1		8	7	9				P11166	-0.176296	0.780112	0.822232		-1.81469	6.12939e-10	3.61187e-09		-1.62354	1.05284e-08	2.78525e-08
P11169	1	1	1		4	4	5				P11169	1.00927	0.687485	0.736284		-1.24508	7.41471e-06	2.20673e-05		-3.11624	2.22734e-06	4.2536e-06
P11172	1	1	1		7	5	9				P11172	4.96673	2.76832e-07	9.00688e-07		-2.42622	0.000105379	0.0002509		-3.99226	5.30183e-14	2.56619e-13
P11177	1	1	1		6	6	8				P11177	5.89915	5.64194e-15	4.97626e-14		0.155836	1.29254e-06	4.48523e-06		-4.07575	1.84201e-15	1.06413e-14
P11182	1	0	0		4	0	0				P11182	4.71754	7.57719e-08	2.71631e-07		3.3933	0.000317403	0.000678455		-2.60519	0.00237713	0.00296171
P11216	1	1	1		26	22	25				P11216	6.43266	1.02453e-53	1.75835e-51		3.27569	6.80461e-43	6.67338e-41		-3.70193	3.43548e-41	1.5723e-39
P11217	1	0	0		8	0	0				P11217	8.04621	3.78811e-15	3.41428e-14		2.74909	0.0236178	0.034122		-4.43494	7.06765e-07	1.45268e-06
P11233	1	1	1		3	3	3				P11233	0.813989	0.0172275	0.0244606		-2.92774	2.85273e-07	1.09714e-06		-2.71059	3.05555e-07	6.60673e-07
P11234	1	1	1		9	10	10				P11234	0.414814	0.368184	0.417322		-1.68373	2.59795e-10	1.63373e-09		-2.53149	2.09071e-11	7.59404e-11
P11277	1	0	0		4	0	0				P11277	8.16767	8.22239e-11	4.4388e-10		2.3306	0.00169989	0.00308316		-6.21303	2.74461e-05	4.53654e-05
P11279	1	1	1		4	5	6				P11279	-0.410127	0.186782	0.222356		-4.1984	3.53945e-11	2.51362e-10		-3.25752	1.86691e-08	4.77036e-08
P11310	1	1	1		5	2	8				P11310	4.59606	4.8e-11	2.66458e-10		1.09861	5.46351e-06	1.67816e-05		-3.79959	6.53732e-13	2.78462e-12
P11387	1	1	1		12	14	19				P11387	-0.869177	0.00682019	0.0103777		-4.43934	6.26619e-32	3.14761e-30		-3.85815	7.19634e-32	1.62867e-30
P11388	1	1	1		7	39	47				P11388	-0.069112	1	1		-4.02233	5.75234e-57	1.12828e-54		-3.85179	1.99588e-74	4.32686e-72
P11413	1	1	1		15	15	18				P11413	1.90945	2.2732e-13	1.60605e-12		-1.97338	9.00994e-20	1.75886e-18		-3.45884	4.90656e-29	8.90314e-28
P11498	1	0	1		22	0	12				P11498	6.95832	2.90757e-35	1.19763e-33		3.50405	3.19182e-27	1.02712e-25		-2.76718	2.00638e-14	1.02028e-13
P11586	1	1	1		29	25	38				P11586	2.2536	8.05508e-21	1.19779e-19		-2.55878	2.1128e-35	1.35978e-33		-4.15988	4.22749e-59	4.97516e-57
P11717	1	1	1		14	19	19				P11717	0.323836	0.998653	1		-1.8714	5.6854e-14	5.78226e-13		-2.06798	3.73988e-15	2.08075e-14
P11766	1	1	1		9	8	10				P11766	8.79311	6.61931e-23	1.2011e-21		4.31416	5.19443e-16	6.79234e-15		-3.77467	7.54153e-14	3.61204e-13
P11802	0	0	1		0	0	3				P11802	6.08533	0.000563064	0.00103216		-0.837075	0.0035638	0.00605581		-6.09591	9.33599e-06	1.64663e-05
P11908	1	1	1		3	3	3				P11908	3.96191	6.05657e-07	1.86311e-06		-0.825056	0.00267526	0.00468312		-4.49017	6.63371e-09	1.79529e-08
P11940	1	1	1		18	17	18				P11940	1.96565	5.74615e-16	5.55596e-15		-0.790408	2.87565e-08	1.30306e-07		-2.6985	1.60947e-24	2.02734e-23
P12004	1	1	1		7	6	7				P12004	2.19219	7.58846e-08	2.71799e-07		-0.676669	0.000950575	0.00181353		-2.93583	7.62319e-11	2.60892e-10
P12036	1	0	0		5	0	0				P12036	5.66315	8.37021e-06	2.13329e-05		5.30265	1.51686e-06	5.19362e-06		0.437067	0.989536	0.992911
P12081	1	1	1		9	10	11				P12081	1.81382	2.97445e-10	1.4996e-09		-1.11094	0.000882374	0.00169757		-2.69039	4.06135e-15	2.25454e-14
P12109	1	1	1		6	5	3				P12109	6.71109	3.53732e-14	2.80736e-13		7.72437	1.11166e-13	1.09543e-12		0.458378	0.839187	0.852432
P12110	1	1	0		6	3	0				P12110	6.7101	1.10149e-15	1.02881e-14		4.9382	3.00824e-10	1.8633e-09		-0.736738	0.119633	0.128593
P12111	1	1	0		14	3	0				P12111	6.92478	4.19994e-24	8.60674e-23		4.74696	6.41197e-21	1.40484e-19		-0.896449	0.203062	0.216127
P12236	1	1	1		7	6	7				P12236	2.45038	4.68618e-10	2.31443e-09		-0.799924	0.000430342	0.000892537		-3.08711	5.65234e-12	2.18698e-11
P12259	0	1	1		0	9	8				P12259	-2.47132	1.02616e-09	4.81407e-09		-2.2452	0.0371502	0.051195		0.515302	0.0126013	0.0145759
P12268	1	1	1		17	14	18				P12268	1.6203	2.49117e-09	1.10098e-08		-1.37098	1.27038e-13	1.24588e-12		-3.08009	1.67635e-23	1.91271e-22
P12270	1	1	1		6	5	9				P12270	2.60989	4.30669e-11	2.40696e-10		0.428023	0.579508	0.639798		-2.67144	2.44281e-09	6.94886e-09
P12273	0	1	0		0	2	0				P12273	-0.621505	0.237868	0.27898		1.27584	0.14555	0.180797		1.89735	0.0209294	0.0237553
P12277	1	1	1		9	5	7				P12277	7.49884	1.02215e-22	1.82262e-21		5.47345	2.4521e-21	5.51924e-20		-1.22324	0.0333108	0.0372744
P12429	1	1	1		5	15	18				P12429	-0.793014	0.543136	0.596739		-4.24545	2.06511e-28	7.59483e-27		-3.43478	6.84103e-29	1.22514e-27
P12532	1	1	1		7	6	8				P12532	3.91945	1.92583e-14	1.57703e-13		3.23083	8.1775e-11	5.52183e-10		-0.925628	2.84112e-05	4.68665e-05
P12694	1	0	1		10	0	10				P12694	9.23865	2.27394e-22	3.823e-21		3.2341	1.26109e-20	2.67755e-19		-6.07981	2.31014e-16	1.44174e-15
P12814	1	1	1		35	34	41				P12814	1.36711	7.83369e-21	1.16909e-19		-1.75355	9.22508e-42	8.26046e-40		-3.09542	1.95903e-59	2.44523e-57
P12931	1	1	1		7	6	7				P12931	2.29182	8.2063e-09	3.35668e-08		-0.964473	0.000120426	0.00028232		-3.45044	9.17189e-15	4.88101e-14
P12955	0	0	1		0	0	2				P12955	4.51937	8.88598e-06	2.25239e-05		-2.19383	0.00119109	0.00223105		-6.71319	5.09777e-08	1.23589e-07
P12956	1	1	1		17	27	29				P12956	-0.6837	9.19735e-05	0.000192018		-3.5222	4.88924e-49	6.71293e-47		-2.97823	3.98556e-38	1.5061e-36
P13010	1	1	1		15	24	26				P13010	-0.0821662	0.999974	1		-4.05503	1.09142e-32	5.83837e-31		-3.52776	5.38169e-32	1.23839e-30
P13073	0	1	1		0	4	4				P13073	-1.50325	0.00618115	0.00946475		-4.18427	1.03362e-09	5.92137e-09		-3.70514	1.24465e-07	2.82931e-07
P13489	0	1	1		0	2	2				P13489	1.08072	0.0137413	0.0198668		-1.87719	0.000309306	0.000662868		-2.9579	1.67375e-06	3.25351e-06
P13497	1	1	1		8	10	11				P13497	0.636251	0.0504232	0.0662498		-2.62373	2.98537e-15	3.56427e-14		-3.38781	2.5129e-16	1.55883e-15
P13501	0	1	1		0	2	2				P13501	-2.56365	0.000862881	0.0015353		-4.02234	4.5974e-06	1.43677e-05		-1.45868	0.000308262	0.000433504
P13521	1	0	0		8	0	0				P13521	10.2499	1.59672e-24	3.33851e-23		6.11845	2.09971e-14	2.28801e-13		-3.93673	9.9814e-09	2.64565e-08
P13591	1	0	0		5	0	0				P13591	7.6082	7.74658e-12	4.68548e-11		2.35599	4.40842e-05	0.000113418		-3.16431	3.82927e-06	7.12089e-06
P13637	1	1	1		24	17	17				P13637	1.619	4.04699e-20	5.6316e-19		-0.476502	4.1964e-05	0.000109022		-2.18814	7.08769e-28	1.18676e-26
P13639	1	1	1		36	31	38				P13639	4.15917	1.64805e-61	4.52555e-59		0.168691	0.996157	1		-3.8971	1.98307e-62	2.81665e-60
P13645	1	1	1		29	32	31				P13645	-1.26786	5.50775e-10	2.70721e-09		-0.578418	0.847027	0.892988		0.75982	0.528688	0.546466
P13646	0	1	1		0	9	8				P13646	-1.01713	0.850926	0.886883		-2.19179	0.00032613	0.000696386		-0.66788	0.992918	0.99541
P13647	1	1	1		18	22	22				P13647	-1.63486	1.53619e-13	1.12791e-12		-1.19749	0.00570616	0.00926436		0.320023	0.977087	0.981615
P13667	1	1	1		11	15	17				P13667	0.107622	1	1		-2.74773	5.25104e-19	9.74282e-18		-2.16495	1.77691e-18	1.33075e-17
P13674	1	1	1		9	4	12				P13674	4.08797	1.08448e-14	9.22927e-14		-0.500397	0.348705	0.404596		-4.98784	1.50138e-20	1.38349e-19
P13693	1	1	1		3	2	3				P13693	2.89052	0.000176505	0.000351559		-0.672616	0.433573	0.492795		-3.80692	0.000100593	0.000152137
P13716	0	0	1		0	0	2				P13716	2.26512	0.0216277	0.0300757		-2.1403	9.56557e-05	0.000229473		-4.40541	0.000465797	0.000636568
P13726	0	1	1		0	4	4				P13726	-1.13584	0.0401659	0.053455		-4.01359	1.02446e-06	3.60662e-06		-2.87774	1.54558e-08	3.99387e-08
P13796	1	1	0		6	5	0				P13796	4.7346	9.50092e-08	3.35054e-07		3.18077	3.9552e-10	2.3958e-09		-1.37882	0.0210562	0.0238926
P13797	1	1	1		17	15	20				P13797	0.835412	3.00159e-07	9.71213e-07		-1.87214	1.49749e-20	3.14702e-19		-2.71265	1.86684e-29	3.47943e-28
P13798	1	1	1		6	8	11				P13798	1.4036	0.000199063	0.000393635		-1.56162	5.86056e-05	0.000146924		-3.80883	3.74322e-15	2.08075e-14
P13804	1	1	1		7	7	10				P13804	1.19452	1.83829e-06	5.21841e-06		-1.09124	0.869876	0.914969		-3.37212	9.1955e-18	6.46353e-17
P13807	1	1	1		9	8	11				P13807	3.55538	7.28243e-18	8.33232e-17		-1.15064	1.81068e-05	5.05641e-05		-4.57089	1.85167e-23	2.10691e-22
P13861	1	1	1		7	6	12				P13861	1.83865	1.63522e-08	6.40864e-08		-0.148988	0.986203	1		-3.27469	5.97604e-19	4.67083e-18
P13929	1	1	1		5	3	3				P13929	3.26202	6.63765e-08	2.40039e-07		1.4577	0.105857	0.134742		-2.09803	5.44934e-05	8.58349e-05
P13984	1	0	1		3	0	7				P13984	2.4586	2.33328e-05	5.50131e-05		-3.63995	1.36238e-09	7.6597e-09		-7.87151	1.50024e-11	5.56208e-11
P14136	1	0	0		3	0	0				P14136	8.60571	0.000344942	0.000652644		2.79149	0.000570534	0.00114916		-6.13579	0.00243215	0.00302842
P14209	0	1	1		0	2	2				P14209	-1.04679	0.0922461	0.115245		-3.41396	4.25971e-05	0.000110212		-2.36717	0.000435921	0.000597523
P14314	1	1	1		4	4	7				P14314	0.614068	0.0185587	0.0261612		-4.14275	5.12998e-09	2.58318e-08		-3.87543	3.81966e-14	1.88421e-13
P14324	1	0	1		4	0	4				P14324	6.57772	1.24616e-05	3.07913e-05		-1.41144	0.000374606	0.000787524		-6.8901	1.11572e-08	2.94405e-08
P14406	0	0	1		0	0	2				P14406	1.75995	0.214147	0.252693		-6.57628	4.19639e-06	1.32451e-05		-8.33622	1.91203e-05	3.22244e-05
P14543	1	1	1		25	36	34				P14543	-2.42407	2.43607e-42	1.76038e-40		-2.2429	9.36189e-34	5.50881e-32		0.236365	0.650022	0.667524
P14550	1	1	1		5	4	6				P14550	3.58277	5.72601e-07	1.77068e-06		3.08965	4.84345e-06	1.50909e-05		-3.43509	8.49693e-07	1.72749e-06
P14618	1	1	1		37	32	38				P14618	3.28032	4.81067e-40	2.83074e-38		0.275307	0.832395	0.879363		-3.78846	9.41907e-58	9.94799e-56
P14625	1	1	1		38	31	37				P14625	4.83704	3.19153e-74	1.31459e-71		2.27481	1.26814e-53	2.17644e-51		-2.55092	2.38317e-46	1.44357e-44
P14635	0	0	1		0	0	4				P14635	4.4984	6.5409e-09	2.71319e-08		-1.29758	0.00146075	0.00268849		-5.79597	8.6394e-11	2.92886e-10
P14678;P63162	1	1	1		5	5	5				P14678;P63162	0.0253056	0.998959	1		-3.47166	5.02763e-12	3.99784e-11		-3.40657	2.10767e-11	7.64888e-11
P14735	1	1	1		8	6	8				P14735	2.60238	1.82169e-08	7.0922e-08		-0.524486	0.00331098	0.00568247		-3.19954	4.76406e-11	1.66439e-10
P14866	1	1	1		14	11	15				P14866	2.70498	1.7856e-19	2.32016e-18		-1.08691	2.76855e-13	2.61552e-12		-3.85852	2.36117e-27	3.68396e-26
P14868	1	1	1		25	18	27				P14868	2.6805	2.1025e-26	4.97712e-25		0.229409	0.997371	1		-3.46696	5.99108e-42	2.90321e-40
P14923	1	1	1		16	17	17				P14923	-0.0665841	0.999994	1		-1.04201	4.51704e-06	1.4138e-05		-0.981784	3.83385e-05	6.1686e-05
P15121	1	1	1		6	4	7				P15121	4.06616	2.23634e-07	7.40472e-07		-2.822	1.20502e-05	3.46129e-05		-4.6272	5.21573e-17	3.40831e-16
P15151	1	1	1		6	6	6				P15151	0.0853742	0.925553	0.955716		-1.76014	8.78664e-07	3.1254e-06		-1.7838	5.09303e-06	9.33608e-06
P15170	1	1	1		7	6	8				P15170	3.5164	1.1263e-14	9.56545e-14		0.463195	0.048435	0.0655831		-2.876	7.84894e-13	3.31845e-12
P15260	0	0	1		0	0	2				P15260	3.50261	0.00410219	0.00648884		-4.80172	0.000660406	0.00131411		-8.30432	2.56307e-06	4.86511e-06
P15291	0	1	1		0	3	2				P15291	0.470394	0.170343	0.204025		-0.453751	0.634735	0.694784		-2.19069	0.0100854	0.0117782
P15311	1	1	1		14	16	18				P15311	-0.407774	0.986695	1		-2.55713	1.09268e-14	1.23647e-13		-2.05683	1.88945e-16	1.18638e-15
P15374	1	1	1		4	5	5				P15374	5.34028	9.16691e-14	6.87769e-13		2.31317	2.24144e-09	1.20797e-08		-3.0271	1.74818e-09	5.0781e-09
P15531	1	1	1		4	3	5				P15531	1.67905	0.0389993	0.0520876		-1.34762	0.00011373	0.000268917		-2.92717	0.00173352	0.00219839
P15559	1	1	1		8	6	11				P15559	2.48964	1.03907e-11	6.17597e-11		-3.14781	1.8923e-20	3.93655e-19		-5.82494	7.59635e-28	1.2566e-26
P15586	1	1	1		3	4	5				P15586	0.446261	0.206481	0.244676		-1.33784	3.52867e-05	9.29321e-05		-1.85382	2.38774e-07	5.24539e-07
P15880	1	1	1		12	12	12				P15880	1.51635	3.50965e-09	1.51631e-08		-2.60729	3.51705e-23	9.05421e-22		-4.26418	2.74786e-25	3.66292e-24
P15924	1	1	1		43	57	54				P15924	-1.17746	3.32476e-07	1.0699e-06		-1.01209	0.0134936	0.0204114		0.152125	1	1
P15927	1	1	1		2	3	3				P15927	1.71291	0.285761	0.330354		-3.00042	3.13832e-08	1.40661e-07		-2.87268	8.85619e-06	1.56897e-05
P16035	1	1	1		2	4	4				P16035	-0.494459	0.34586	0.393971		-0.868847	0.0351315	0.0488214		-0.0580208	0.936589	0.944847
P16070	1	1	1		5	8	8				P16070	-2.14545	5.5201e-05	0.000120303		-5.43107	1.85996e-15	2.25329e-14		-3.06717	1.29434e-12	5.35282e-12
P16144	0	1	1		0	22	31				P16144	-0.934089	0.263154	0.306455		-3.97569	1.31417e-24	3.75906e-23		-2.91872	4.4058e-41	1.97255e-39
P16152	1	1	1		8	5	8				P16152	3.18404	8.00372e-06	2.05148e-05		-0.54982	0.0330544	0.046153		-3.07027	3.62844e-13	1.6036e-12
P16219	1	0	1		2	0	4				P16219	2.89688	0.051964	0.0681439		-0.67324	0.134053	0.167424		-2.0111	0.00530133	0.00636809
P16278	1	1	1		9	8	11				P16278	1.17791	0.000782565	0.0014033		-3.05812	1.34977e-10	8.83894e-10		-4.0235	3.58847e-23	3.96271e-22
P16298	1	0	0		3	0	0				P16298	9.27836	1.52159e-06	4.40127e-06		3.88408	0.00576011	0.00933723		-5.39428	1.32128e-05	2.27999e-05
P16401	1	1	1		4	8	8				P16401	-2.36149	7.25075e-09	2.97172e-08		-6.55503	2.42659e-24	6.75347e-23		-4.13265	7.30519e-16	4.35457e-15
P16435	0	0	1		0	0	4				P16435	2.17767	0.0109372	0.0160436		-3.89885	4.00942e-07	1.50271e-06		-5.81302	6.41548e-08	1.53457e-07
P16519	1	0	0		7	0	0				P16519	8.67614	5.81068e-15	5.10324e-14		5.84536	3.23854e-11	2.31188e-10		-2.11899	3.30461e-05	5.3929e-05
P16520	1	0	0		2	0	0				P16520	10.0134	2.64813e-07	8.64315e-07		6.90748	0.000258579	0.000562645		-3.10596	0.0149203	0.0171379
P16615	1	1	1		8	8	10				P16615	2.69272	1.40553e-14	1.1767e-13		-0.00323228	1	1		-2.67881	8.9347e-16	5.28765e-15
P16870	1	0	0		5	0	0				P16870	7.62535	6.9874e-14	5.34964e-13		4.95957	8.8005e-08	3.66154e-07		-2.31698	0.00543172	0.00650763
P16885	1	0	1		2	0	4				P16885	5.61599	1.38293e-09	6.37884e-09		-0.388889	0.730808	0.786569		-5.56857	2.33086e-10	7.46565e-10
P16930	1	0	1		3	0	2				P16930	5.61055	1.21759e-07	4.20744e-07		2.54132	4.95215e-08	2.15851e-07		-3.07281	4.22577e-05	6.76748e-05
P16949	1	1	1		5	5	5				P16949	-0.378128	0.273094	0.317045		-2.14309	1.29458e-08	6.16462e-08		-2.09342	2.64699e-07	5.78099e-07
P16989	1	1	1		3	9	9				P16989	-1.85101	4.20001e-11	2.35224e-10		-3.11636	4.16793e-16	5.55589e-15		-2.06709	1.00402e-10	3.37874e-10
P17096	1	1	1		2	2	3				P17096	1.87556	0.0615682	0.079673		-3.11665	1.59875e-05	4.51044e-05		-3.97152	7.14155e-06	1.2823e-05
P17174	1	1	1		10	8	14				P17174	1.97881	1.19864e-09	5.5599e-09		-2.50748	1.92659e-07	7.63776e-07		-4.05943	2.97422e-24	3.59262e-23
P17252	1	1	1		8	7	9				P17252	3.45494	4.79272e-14	3.73886e-13		0.304561	0.190789	0.232917		-2.62406	2.17232e-13	9.91993e-13
P17301	1	1	1		8	11	15				P17301	0.626142	0.106027	0.130992		-2.37574	7.62844e-13	6.75732e-12		-3.38294	2.74866e-20	2.45059e-19
P17302	0	0	1		0	0	2				P17302	-0.141528	0.745456	0.790763		-3.24534	0.107647	0.136809		-3.10381	0.000598746	0.000805696
P17480	1	1	1		5	7	8				P17480	0.110723	0.991384	1		-3.01467	3.29061e-08	1.47167e-07		-2.57716	1.0377e-13	4.90732e-13
P17600	1	0	0		7	0	0				P17600	7.95977	1.36591e-14	1.14586e-13		3.46211	1.22403e-11	9.1502e-11		-1.95574	5.86609e-05	9.20824e-05
P17655	1	1	1		12	14	16				P17655	2.31678	2.7157e-15	2.46931e-14		-0.340291	0.0301659	0.0425088		-3.75034	3.9669e-27	6.05172e-26
P17661	1	0	0		6	0	0				P17661	4.81056	9.14837e-13	6.02914e-12		3.96164	9.13182e-07	3.24116e-06		-0.364905	0.381913	0.398556
P17706	0	0	1		0	0	4				P17706	1.36311	0.00502771	0.00782067		-3.87258	0.000205693	0.000456307		-4.70656	3.55854e-06	6.64443e-06
P17812	1	1	1		7	7	12				P17812	1.3519	9.19765e-05	0.000192018		-2.41709	7.8664e-12	6.03383e-11		-3.41574	1.06699e-14	5.59149e-14
P17844	1	1	1		17	13	17				P17844	3.34804	6.73414e-24	1.35307e-22		-1.70016	1.02134e-18	1.83707e-17		-4.87825	1.05672e-35	3.34818e-34
P17858	1	1	1		15	16	21				P17858	3.25959	2.02005e-16	2.02941e-15		-2.0107	0.0238472	0.0344292		-4.13337	6.12093e-39	2.46678e-37
P17900	0	1	1		0	2	2				P17900	-6.82553	0.0133844	0.0193985		-6.40131	0.0288802	0.0408156		0.424224	0.105484	0.113681
P17980	1	1	1		22	17	22				P17980	3.71796	1.97488e-41	1.29119e-39		0.87009	6.27e-06	1.89898e-05		-2.88753	1.23211e-32	3.07578e-31
P17987	1	1	1		21	20	23				P17987	2.68387	8.69177e-12	5.22648e-11		-1.10378	1.41491e-12	1.20413e-11		-3.58207	7.22312e-38	2.68036e-36
P18031	1	1	1		3	8	9				P18031	-1.2443	0.108752	0.134197		-4.74923	4.00479e-14	4.13427e-13		-3.08905	1.13439e-17	7.82674e-17
P18074	0	0	1		0	0	2				P18074	1.29461	0.0039493	0.0062542		-2.67068	9.1478e-05	0.000220608		-3.96529	9.27032e-07	1.87087e-06
P18077	1	1	1		5	6	6				P18077	0.397029	0.240424	0.281737		-1.65971	7.71903e-09	3.81231e-08		-2.10185	1.14579e-07	2.61468e-07
P18085	1	1	1		5	5	5				P18085	1.4353	2.71139e-05	6.29904e-05		0.344937	0.161097	0.19867		-3.10394	9.99088e-08	2.30804e-07
P18124	1	1	1		17	16	18				P18124	0.63866	0.0250924	0.0345324		-2.85039	1.23626e-30	5.47543e-29		-3.49872	6.21938e-30	1.21411e-28
P18206	1	1	1		37	37	40				P18206	1.71948	1.06761e-28	3.01197e-27		-0.773396	5.80213e-10	3.4387e-09		-2.6563	5.20666e-47	3.29942e-45
P18433	1	0	1		3	0	5				P18433	3.4504	6.96015e-08	2.50383e-07		-0.51849	0.0234253	0.0338676		-2.7786	3.2814e-07	7.06909e-07
P18583	1	1	1		3	9	9				P18583	-0.650096	0.0491536	0.064623		-1.42973	3.82443e-10	2.33721e-09		-0.797958	0.0102475	0.0119608
P18621	1	1	1		7	7	8				P18621	1.13617	0.0003448	0.000652644		-2.42678	1.66023e-13	1.59611e-12		-3.84402	1.36467e-14	7.08836e-14
P18669	1	1	1		14	10	13				P18669	6.53764	3.55886e-32	1.2637e-30		3.11467	4.32123e-23	1.09871e-21		-3.56209	4.90955e-23	5.39265e-22
P18754	1	1	1		10	6	10				P18754	2.79077	1.78897e-09	8.08866e-09		-2.79853	2.83564e-14	3.01031e-13		-4.57793	3.28973e-23	3.66227e-22
P18858	0	0	1		0	0	5				P18858	1.92433	0.0458293	0.0604841		-2.32301	2.22747e-05	6.11255e-05		-6.95181	1.38582e-07	3.12606e-07
P19013	0	1	1		0	14	7				P19013	-1.61423	0.136108	0.165426		-1.17276	0.0966924	0.123958		0.705313	0.997959	0.999901
P19021	0	1	1		0	2	2				P19021	0.766812	0.0990265	0.122909		-1.51122	0.00350086	0.00596117		-2.27803	0.000160449	0.000235109
P19022	1	1	1		3	3	4				P19022	1.23627	0.00101628	0.00179121		-1.59094	5.39966e-05	0.000136365		-2.32503	2.31349e-07	5.09042e-07
P19086	1	0	0		2	0	0				P19086	11.371	5.68535e-09	2.38715e-08		4.94099	0.00013214	0.000307331		-6.42999	1.59259e-05	2.71518e-05
P19174	1	1	1		6	3	12				P19174	3.38865	7.9208e-07	2.39543e-06		-2.02834	3.89894e-09	1.9931e-08		-5.96311	5.723e-20	4.98373e-19
P19256	0	1	1		0	2	2				P19256	-1.79226	0.171673	0.20538		-4.63724	2.79068e-05	7.46901e-05		-2.84498	0.000242431	0.000346005
P19338	1	1	1		20	19	20				P19338	-0.194649	0.929252	0.958575		-1.0302	4.17642e-11	2.93561e-10		-1.11511	1.46593e-13	6.79975e-13
P19367	1	1	1		15	11	18				P19367	7.07674	1.82487e-20	2.63742e-19		1.87165	5.07997e-18	8.7185e-17		-5.22053	3.09324e-28	5.28675e-27
P19387	1	1	1		4	5	5				P19387	2.18467	2.27895e-06	6.3727e-06		-0.777011	0.00294652	0.00511228		-2.40647	3.05426e-07	6.60673e-07
P19388	1	1	1		3	3	3				P19388	0.769533	0.343779	0.392251		-2.37547	0.00450493	0.00750943		-2.22997	1.72855e-06	3.35211e-06
P19525	0	1	1		0	4	6				P19525	-0.117748	0.996701	1		-2.50002	6.72414e-05	0.000166547		-2.84276	4.36241e-08	1.0664e-07
P19623	1	1	1		6	4	8				P19623	3.34081	9.62603e-12	5.73801e-11		-0.532714	0.072071	0.094632		-4.51098	1.53742e-13	7.10731e-13
P19784	1	1	1		3	4	5				P19784	1.56802	0.00454335	0.00712103		-0.172087	0.668584	0.727774		-1.70297	2.52146e-05	4.20312e-05
P19823	1	1	1		2	6	4				P19823	-2.81872	6.02374e-08	2.18992e-07		-0.599704	0.219492	0.264896		2.61238	5.69405e-08	1.37077e-07
P19838	1	0	1		2	0	2				P19838	8.76633	6.54942e-09	2.71399e-08		-0.18703	0.615689	0.675912		-8.95336	2.46108e-09	6.98594e-09
P19883	1	1	1		2	2	2				P19883	-1.07871	0.0091444	0.0136322		-3.85583	4.04021e-07	1.51288e-06		-2.77712	9.45164e-06	1.66515e-05
P20020	1	1	1		22	21	22				P20020	1.30824	7.85973e-14	5.99523e-13		-1.10379	7.30183e-16	9.34045e-15		-2.80964	8.91533e-30	1.73218e-28
P20042	1	1	1		10	10	13				P20042	2.40927	7.44496e-10	3.60774e-09		-1.78658	2.29679e-13	2.18487e-12		-4.05327	5.91586e-26	8.31652e-25
P20073	1	1	1		8	13	15				P20073	-0.538257	0.115686	0.142327		-2.5291	7.70129e-19	1.40985e-17		-2.48645	1.35811e-17	9.29242e-17
P20290	1	0	1		3	0	4				P20290	2.96476	0.000324847	0.000617749		-2.30251	1.94571e-06	6.53981e-06		-4.97025	2.2498e-06	4.29422e-06
P20336	1	0	0		3	0	0				P20336	12.014	2.40085e-08	9.21633e-08		7.52512	1.15251e-09	6.56596e-09		-3.84359	2.88474e-05	4.7548e-05
P20337	0	1	1		0	3	3				P20337	2.49956	5.07251e-06	1.34537e-05		0.374167	0.312975	0.366756		-2.12539	0.000166132	0.000243004
P20338	1	0	1		3	0	3				P20338	3.5117	5.46243e-06	1.44322e-05		0.462902	0.0508324	0.0684691		-3.14424	1.62141e-05	2.75975e-05
P20339	1	1	1		8	8	9				P20339	3.53262	3.11547e-18	3.70886e-17		1.40111	2.18436e-08	1.00417e-07		-1.9116	4.40589e-12	1.73332e-11
P20340	1	1	1		11	7	10				P20340	5.68638	1.18078e-23	2.3271e-22		2.51472	2.31647e-17	3.68398e-16		-3.13178	5.73913e-16	3.43098e-15
P20585	0	0	1		0	0	4				P20585	3.79995	4.77353e-07	1.50262e-06		0.0438057	0.99248	1		-3.66092	6.96807e-09	1.88083e-08
P20591	1	0	1		2	0	3				P20591	7.69036	3.83703e-05	8.61762e-05		-1.73241	0.515583	0.575681		-8.76418	9.05615e-05	0.000138105
P20618	1	1	1		8	8	9				P20618	2.65696	7.04229e-09	2.88916e-08		-0.915629	4.20049e-05	0.000109022		-2.83694	3.22747e-13	1.43874e-12
P20645	1	1	1		2	2	3				P20645	0.435625	0.231929	0.272402		-1.24885	0.000165121	0.000374523		-1.20911	5.69009e-05	8.93878e-05
P20700	1	1	1		13	17	19				P20700	-0.00346034	1	1		-2.95587	4.40926e-29	1.71337e-27		-3.03934	7.41522e-24	8.75166e-23
P20774	1	0	0		3	0	0				P20774	10.0965	1.23234e-09	5.70339e-09		12.0662	4.0936e-06	1.29804e-05		-0.430905	0.95393	0.960459
P20839	1	0	1		3	0	3				P20839	3.3474	0.00011836	0.000242549		0.92514	0.00662958	0.0106213		-2.32505	0.000479464	0.000653945
P20908	1	1	1		2	16	17				P20908	-3.16414	2.24831e-16	2.24777e-15		-2.91371	5.94547e-19	1.09328e-17		-0.0487148	0.999989	1
P20930	0	1	0		0	2	0				P20930	-3.01757	0.0611165	0.0791135		-3.61528	0.0352883	0.0490227		-0.597708	0.589322	0.606854
P20936	1	1	1		7	4	7				P20936	4.03805	2.09093e-14	1.70545e-13		1.16781	6.21223e-06	1.88423e-05		-2.90958	1.18827e-11	4.4455e-11
P21127;Q9UQ88	1	1	1		2	2	3				P21127;Q9UQ88	2.69002	0.00129074	0.00223		-1.31013	0.00334891	0.00573323		-3.5964	4.60836e-08	1.12319e-07
P21266	1	0	1		2	0	3				P21266	10.2513	0.000102348	0.000211738		-1.3719	0.019166	0.0281744		-5.58199	1.5906e-05	2.71291e-05
P21281	1	1	1		19	16	19				P21281	6.20034	8.91323e-43	6.6752e-41		3.63842	1.58525e-36	1.10672e-34		-2.55792	8.97196e-22	9.07997e-21
P21283	1	1	1		5	3	5				P21283	3.19461	2.27099e-10	1.16201e-09		1.35858	0.000170658	0.000385384		-2.29407	7.62005e-09	2.04475e-08
P21291	1	1	1		4	3	5				P21291	0.582455	0.469732	0.523573		-2.44113	4.8998e-05	0.000124813		-3.72883	1.10682e-11	4.15585e-11
P21333	1	1	1		74	75	83				P21333	1.94887	7.80428e-51	1.10848e-48		-1.24829	6.43161e-49	8.54574e-47		-3.16118	4.74713e-112	2.1726e-109
P21359	1	0	1		7	0	15				P21359	2.96548	1.297e-11	7.59936e-11		-1.89627	5.98865e-12	4.69852e-11		-4.20026	1.31079e-19	1.09074e-18
P21397	1	0	0		2	0	0				P21397	6.33556	5.39701e-07	1.67397e-06		4.29679	0.000146925	0.000337151		-2.03877	0.0141822	0.0163175
P21399	1	1	1		18	13	23				P21399	5.7934	7.47568e-42	5.04792e-40		2.91632	4.90253e-32	2.49303e-30		-4.27399	1.19977e-32	3.01333e-31
P21579	1	0	0		8	0	0				P21579	10.1718	2.07967e-13	1.47185e-12		5.26185	5.53292e-05	0.00013956		-2.49315	0.246423	0.260461
P21589	1	1	1		7	10	13				P21589	-1.00664	0.0125328	0.0182348		-5.00524	1.0493e-19	2.03872e-18		-3.49173	6.88588e-20	5.90895e-19
P21796	1	1	1		7	4	8				P21796	1.8625	5.99266e-06	1.56922e-05		-0.768329	0.00146621	0.00269732		-2.68423	1.46421e-13	6.79942e-13
P21810	1	0	0		4	0	0				P21810	4.75199	9.04358e-12	5.4222e-11		4.06916	1.75508e-08	8.15933e-08		-1.3176	0.00602531	0.00719161
P21912	1	0	1		2	0	3				P21912	2.27065	0.10813	0.13347		-1.301	0.434018	0.493165		-3.18307	2.82692e-07	6.15113e-07
P21926	1	1	1		5	6	6				P21926	-1.30394	7.61078e-06	1.95808e-05		-4.03936	3.18691e-14	3.3317e-13		-2.59249	1.88823e-09	5.45414e-09
P21980	1	1	1		3	3	3				P21980	-0.0649412	0.991249	1		-0.83255	0.163742	0.201872		-0.898569	0.235238	0.24913
P22033	1	0	1		13	0	14				P22033	6.78366	1.30853e-25	2.94526e-24		2.37867	1.80112e-16	2.53202e-15		-4.23884	2.5055e-13	1.13408e-12
P22059	1	1	1		5	6	8				P22059	0.19672	0.876248	0.910847		-0.838577	0.0122857	0.0187148		-2.08199	1.59127e-10	5.22266e-10
P22061	1	1	1		8	6	9				P22061	2.92961	2.62417e-07	8.57853e-07		-1.0748	0.000103093	0.0002456		-4.15796	9.8336e-15	5.20625e-14
P22087	1	1	1		8	6	8				P22087	1.62546	3.70392e-07	1.18451e-06		-2.076	2.47904e-12	2.04633e-11		-3.5825	4.48668e-15	2.48395e-14
P22102	1	1	1		6	6	10				P22102	1.40375	0.391335	0.441136		-2.59347	2.86566e-08	1.30139e-07		-3.72325	1.55801e-14	8.05199e-14
P22234	1	1	1		12	11	12				P22234	4.91731	1.86482e-25	4.12967e-24		1.79141	4.99266e-13	4.53968e-12		-3.31535	6.16286e-18	4.39184e-17
P22307	1	1	1		3	2	3				P22307	6.66029	3.14012e-05	7.20565e-05		1.47805	0.02981	0.0420504		-4.54523	9.33851e-06	1.64663e-05
P22314	1	1	1		28	24	30				P22314	3.69642	5.64463e-39	2.9808e-37		0.466277	0.00023015	0.000504786		-3.54885	7.22741e-56	6.92319e-54
P22392	1	1	1		9	7	9				P22392	2.33719	3.53288e-10	1.76387e-09		-0.842853	6.05511e-05	0.000151066		-3.40551	5.1806e-14	2.51935e-13
P22413	0	1	1		0	5	8				P22413	0.883606	0.0307565	0.0417417		-2.15347	8.31304e-08	3.48336e-07		-3.52908	1.40508e-12	5.77021e-12
P22570	0	0	1		0	0	6				P22570	4.14465	0.00100793	0.00177725		-2.98439	2.86341e-06	9.30158e-06		-5.63742	1.36827e-06	2.6992e-06
P22626	1	1	1		16	17	17				P22626	-0.265344	0.788126	0.828982		-2.18611	8.1851e-22	1.89407e-20		-1.40583	2.27295e-10	7.28583e-10
P22694	1	1	1		9	4	9				P22694	3.87793	3.56097e-19	4.55517e-18		2.12601	1.01471e-09	5.82115e-09		-2.60921	1.14642e-08	3.01926e-08
P22695	1	1	1		2	2	3				P22695	1.3369	0.00783926	0.0118062		-2.27223	4.47614e-07	1.66702e-06		-3.60913	4.60979e-07	9.68267e-07
P22735	1	1	1		3	6	6				P22735	-1.42878	4.60227e-05	0.000101809		-0.412466	0.677072	0.736235		0.874037	0.104546	0.112788
P22830	1	0	1		2	0	2				P22830	13.3076	1.20141e-11	7.07953e-11		3.00901	0.45269	0.511839		-10.2986	1.43255e-09	4.19678e-09
P23142	1	1	1		5	7	6				P23142	-2.04869	1.04036e-08	4.18482e-08		-0.634752	0.0184502	0.0272291		1.45329	1.04899e-06	2.09952e-06
P23193	1	1	1		5	5	5				P23193	1.78189	5.40783e-06	1.42971e-05		-0.213175	0.304789	0.357671		-1.88772	6.38699e-08	1.53042e-07
P23229	1	1	1		8	25	29				P23229	-2.2283	9.30521e-12	5.57096e-11		-5.05828	2.46068e-36	1.68926e-34		-2.93396	1.43573e-40	6.29125e-39
P23246	1	1	1		24	18	28				P23246	2.41367	1.5436e-27	3.94911e-26		-3.03696	4.48903e-40	3.69807e-38		-5.35297	7.09952e-59	7.90349e-57
P23258	1	1	1		9	7	10				P23258	3.02979	2.6054e-10	1.32326e-09		-1.97822	1.10093e-09	6.28078e-09		-4.41398	5.31311e-16	3.19019e-15
P23284	1	1	1		7	7	7				P23284	-0.14037	0.95242	0.976847		-2.20735	5.00391e-10	2.99145e-09		-1.7687	3.08033e-06	5.80151e-06
P23368	1	1	1		6	6	10				P23368	2.25736	1.82118e-05	4.37401e-05		-0.369165	0.652253	0.711879		-4.06997	1.28839e-19	1.07426e-18
P23381	1	1	1		10	9	12				P23381	5.23972	6.87281e-16	6.58352e-15		1.66829	0.0138707	0.0209433		-4.64913	3.78686e-14	1.87027e-13
P23396	1	1	1		16	14	16				P23396	2.19488	7.90053e-18	8.98958e-17		-1.46766	1.31966e-13	1.29114e-12		-3.7169	2.20341e-26	3.16232e-25
P23458	0	1	1		0	2	4				P23458	0.00934495	0.99483	1		-2.86663	7.45083e-05	0.000182787		-2.63755	3.68675e-08	9.13702e-08
P23468	1	1	1		6	3	6				P23468	3.22959	4.38103e-09	1.85272e-08		-0.811216	0.00362647	0.00614708		-4.31326	7.45189e-12	2.83944e-11
P23470	0	1	1		0	2	5				P23470	3.47293	0.00272677	0.00444462		-3.30626	6.19166e-08	2.65183e-07		-5.49685	6.61619e-09	1.79172e-08
P23526	1	1	1		17	13	16				P23526	6.25521	1.49266e-38	7.49788e-37		1.41998	1.77967e-19	3.44153e-18		-4.79236	6.85199e-36	2.23995e-34
P23528	1	1	1		8	8	8				P23528	2.07965	5.29263e-11	2.90671e-10		0.499463	0.0302564	0.0426218		-1.60804	2.52519e-09	7.14021e-09
P23588	0	1	0		0	2	0				P23588	-0.0423278	0.97138	0.993079		-1.94997	0.227577	0.27393		-0.911935	0.0449432	0.0497905
P23634	0	1	1		0	3	4				P23634	-1.21508	0.247802	0.289724		-3.60678	2.5223e-05	6.82164e-05		-2.6148	2.15627e-07	4.7623e-07
P23743	0	1	1		0	2	4				P23743	1.8515	0.041782	0.0554624		-2.8123	2.2231e-06	7.38463e-06		-3.57736	2.78202e-08	7.00008e-08
P23786	1	0	1		6	0	9				P23786	5.41653	8.38648e-08	2.98049e-07		-0.359637	0.969711	0.998809		-4.52318	2.65867e-10	8.44991e-10
P23919	0	1	1		0	5	7				P23919	0.00799733	1	1		-3.77754	5.54197e-07	2.0309e-06		-3.78553	2.06406e-11	7.50385e-11
P23921	1	1	1		12	7	18				P23921	2.62167	3.14641e-12	1.97863e-11		-2.09364	1.7371e-16	2.4588e-15		-5.15516	9.93991e-30	1.92218e-28
P24534	1	1	1		4	4	4				P24534	2.06192	2.01385e-07	6.73298e-07		-0.767556	0.00107936	0.00204126		-2.89466	1.23611e-09	3.66297e-09
P24539	0	0	1		0	0	3				P24539	5.41238	2.39072e-07	7.87214e-07		-0.484298	0.71558	0.771792		-4.76344	1.42858e-08	3.72425e-08
P24592	0	1	1		0	2	2				P24592	-3.62759	0.000554848	0.00101846		-4.29471	4.10646e-06	1.30112e-05		-0.667121	0.893241	0.904217
P24593	0	0	1		0	0	2				P24593	7.12156	0.000135583	0.000275378		-0.84666	0.000640151	0.00127627		-7.96822	3.08396e-05	5.05284e-05
P24666	1	1	1		2	3	4				P24666	1.231	9.81427e-08	3.44335e-07		-2.05562	0.0746374	0.0975664		-2.60585	3.20564e-06	6.01376e-06
P24752	1	1	1		10	7	11				P24752	5.61328	4.93044e-20	6.76949e-19		2.24253	5.55697e-13	4.99764e-12		-3.90727	5.04958e-17	3.30671e-16
P24821	1	1	1		6	44	53				P24821	-1.45885	1.87549e-13	1.35529e-12		-4.37134	1.77131e-72	5.21145e-70		-3.23541	2.42918e-75	5.55877e-73
P24844	1	1	1		3	2	3				P24844	1.70193	0.000157256	0.000315507		-0.82103	0.00221793	0.00392424		-2.52296	9.54935e-07	1.92324e-06
P24928	1	1	1		13	4	15				P24928	3.48572	1.05049e-11	6.23483e-11		-0.989251	5.11144e-07	1.88825e-06		-4.55073	1.1975e-16	7.62364e-16
P24941	1	1	1		5	5	6				P24941	2.66032	7.7224e-10	3.72902e-09		-2.16786	2.19447e-08	1.00769e-07		-5.77202	2.34663e-14	1.17589e-13
P25098;P35626	1	0	1		2	0	2				P25098;P35626	7.82747	3.16252e-05	7.25302e-05		1.65367	0.000729325	0.00143622		-6.1738	0.000206286	0.000297407
P25205	1	1	1		13	16	23				P25205	1.11915	0.00435374	0.00685253		-4.21573	4.213e-32	2.16917e-30		-4.97008	2.20119e-40	9.54392e-39
P25311	0	1	0		0	3	0				P25311	-2.68956	1.26983e-05	3.13388e-05		-1.2042	0.0396382	0.0543508		1.27382	0.174042	0.185961
P25325	1	0	1		4	0	4				P25325	4.96872	2.12647e-09	9.48963e-09		1.73491	2.04408e-05	5.65071e-05		-4.09331	4.21554e-08	1.03479e-07
P25391	1	1	1		12	66	44				P25391	-3.0306	1.71022e-48	2.13466e-46		-1.02747	3.86528e-10	2.35519e-09		2.19013	7.24623e-47	4.52231e-45
P25398	1	1	1		2	2	2				P25398	2.72721	7.37423e-05	0.000156247		0.289891	0.745815	0.800838		-2.43732	8.47586e-05	0.000129736
P25445	0	1	1		0	3	3				P25445	-1.45346	0.170447	0.204091		-1.52169	0.000184594	0.000414129		-1.53449	0.00401623	0.00490013
P25685	1	1	1		3	3	3				P25685	3.0669	1.82644e-06	5.19551e-06		-1.54946	0.00182113	0.00327565		-4.61636	2.35783e-09	6.71638e-09
P25705	1	1	1		26	16	24				P25705	7.74915	3.40975e-53	5.40184e-51		3.88903	1.50475e-48	1.93689e-46		-3.36273	7.56771e-28	1.2566e-26
P25786	1	1	1		8	7	9				P25786	4.92335	6.50885e-18	7.53088e-17		0.526518	0.00399387	0.00672345		-4.05326	4.07988e-17	2.68451e-16
P25787	1	1	1		8	5	8				P25787	3.43802	1.78062e-12	1.14599e-11		-0.0466062	0.996972	1		-3.54046	2.06068e-10	6.66245e-10
P25788	1	1	1		5	5	5				P25788	4.07666	2.4542e-11	1.40596e-10		0.337988	0.311195	0.364877		-4.27904	3.20557e-12	1.28192e-11
P25789	1	1	1		5	4	5				P25789	3.80028	6.05002e-09	2.52995e-08		0.491867	0.174794	0.214534		-3.30841	7.35822e-08	1.7339e-07
P26006	1	1	1		15	18	19				P26006	-1.20587	7.25316e-11	3.9362e-10		-4.35546	4.30175e-42	4.01325e-40		-3.36643	6.58102e-23	7.13348e-22
P26022	1	1	1		5	5	5				P26022	1.29746	3.11871e-05	7.16451e-05		1.20188	1.73476e-05	4.85755e-05		-0.262118	0.787215	0.801617
P26038	1	1	1		26	27	29				P26038	1.15158	2.18467e-07	7.26283e-07		-0.584334	2.31562e-07	9.07792e-07		-1.62329	6.79007e-20	5.83889e-19
P26196	1	1	1		10	7	10				P26196	4.68125	2.03039e-22	3.47019e-21		0.938586	9.83045e-09	4.77496e-08		-3.63932	8.40748e-22	8.52966e-21
P26358	1	1	1		3	6	10				P26358	1.34788	1.14866e-05	2.864e-05		-3.07868	3.01957e-14	3.18913e-13		-5.24372	2.50689e-18	1.84721e-17
P26368	1	1	1		6	7	9				P26368	0.968483	2.63587e-05	6.14092e-05		-1.96132	9.25986e-09	4.52448e-08		-3.38441	5.22546e-15	2.85839e-14
P26373	1	1	1		9	10	10				P26373	0.502753	0.277736	0.321799		-3.70322	2.01603e-13	1.93117e-12		-3.41045	6.85838e-19	5.31009e-18
P26440	1	1	1		8	5	8				P26440	8.33584	1.56494e-19	2.05286e-18		2.7745	1.55054e-16	2.21759e-15		-5.2361	1.51094e-14	7.81854e-14
P26572	1	1	1		2	2	4				P26572	0.896619	0.0687836	0.0880062		-0.978976	0.0532602	0.0715327		-2.46446	0.000307389	0.000432423
P26583	1	1	1		6	7	7				P26583	-0.341209	0.294779	0.340074		-2.05523	1.78454e-10	1.15574e-09		-1.44022	9.65029e-05	0.000146353
P26599	1	1	1		5	6	7				P26599	1.79173	1.01211e-05	2.54634e-05		-1.70461	3.01266e-05	8.00591e-05		-3.14242	1.45467e-11	5.398e-11
P26639	1	1	1		20	22	26				P26639	2.02555	4.79901e-06	1.28108e-05		-0.314712	0.992044	1		-1.95703	2.06757e-24	2.57291e-23
P26640	1	1	1		23	16	29				P26640	3.99465	1.68459e-20	2.44325e-19		0.396687	0.941017	0.978059		-4.56434	2.35148e-40	1.00893e-38
P26641	1	1	1		18	14	19				P26641	4.13101	9.83375e-31	3.13994e-29		0.240474	0.275735	0.326085		-4.07641	1.3676e-31	2.96481e-30
P27105	1	1	1		12	11	13				P27105	1.03626	0.00177477	0.00299111		-1.71678	1.3108e-17	2.16835e-16		-2.72842	1.80028e-18	1.3458e-17
P27144	1	1	1		3	2	5				P27144	2.3115	0.0164731	0.0234703		-2.95588	1.58245e-07	6.34675e-07		-5.26737	1.01075e-09	3.03889e-09
P27348	1	1	1		9	9	9				P27348	3.40395	3.74373e-16	3.68029e-15		0.74126	0.000949612	0.00181254		-2.72272	4.59229e-15	2.53222e-14
P27361	1	1	1		8	3	7				P27361	6.15373	8.97631e-16	8.42219e-15		2.7961	1.79969e-14	1.98738e-13		-4.79259	9.30834e-12	3.52724e-11
P27482	0	1	0		0	3	0				P27482	-0.0286044	0.998527	1		-0.384606	0.739287	0.794449		-0.356002	0.865156	0.876649
P27635	1	1	1		6	3	7				P27635	2.0928	5.02444e-09	2.12046e-08		-3.10114	9.74835e-11	6.52902e-10		-6.12864	1.24178e-14	6.47455e-14
P27658	0	1	1		0	2	4				P27658	0.526192	0.510597	0.565668		-4.17151	4.85429e-10	2.91045e-09		-4.6977	3.489e-07	7.48889e-07
P27694	1	1	1		9	13	18				P27694	1.31733	0.0901742	0.112793		-3.81154	7.11458e-28	2.44208e-26		-3.6472	1.46948e-29	2.78931e-28
P27695	1	1	1		2	8	8				P27695	-0.82916	0.175247	0.20929		-1.88955	0.146936	0.182463		-0.870851	0.000936654	0.00122947
P27701	1	1	1		2	4	4				P27701	-0.551963	0.311389	0.357872		-3.29784	2.86496e-07	1.10082e-06		-2.67575	3.39492e-07	7.30217e-07
P27708	1	1	1		22	17	26				P27708	2.0388	5.40153e-13	3.64736e-12		-0.936935	2.65721e-07	1.02867e-06		-2.67232	6.15987e-34	1.66924e-32
P27797	1	1	1		8	9	9				P27797	1.15441	0.00136499	0.00234267		-2.16113	1.6458e-11	1.20839e-10		-2.70782	4.03802e-12	1.59929e-11
P27816	1	1	1		8	13	13				P27816	-1.36688	8.43487e-11	4.5416e-10		-2.70085	1.04122e-18	1.85662e-17		-1.35245	3.58426e-13	1.58578e-12
P27824	1	1	1		9	11	11				P27824	1.96122	6.36019e-07	1.95068e-06		-1.25328	0.00030201	0.000648244		-2.99502	2.00528e-14	1.02028e-13
P28062	0	1	1		0	2	6				P28062	-0.12205	0.997054	1		-5.09545	1.75673e-09	9.6867e-09		-5.16578	8.63222e-11	2.92884e-10
P28065	0	1	1		0	3	3				P28065	1.03496	0.0244367	0.0336976		-2.64603	1.00229e-05	2.92174e-05		-3.68099	6.5866e-09	1.78488e-08
P28066	1	1	1		6	5	6				P28066	2.84424	4.33401e-10	2.14823e-09		-0.395628	0.103027	0.131383		-3.21532	9.58343e-12	3.62148e-11
P28069	1	0	0		3	0	0				P28069	3.03731	1.06634e-06	3.16446e-06		2.07877	0.000141901	0.000327534		-3.06261	1.9039e-06	3.67487e-06
P28070	1	1	1		5	4	6				P28070	3.86735	1.01163e-11	6.02154e-11		0.520507	0.0834999	0.108156		-3.7812	1.1364e-12	4.72335e-12
P28072	1	1	1		3	3	3				P28072	2.72295	2.12392e-05	5.03073e-05		-0.465288	0.238793	0.285927		-3.18824	1.00582e-07	2.321e-07
P28074	1	1	1		7	8	9				P28074	4.51634	1.15418e-16	1.19448e-15		1.02194	3.99946e-06	1.27112e-05		-3.89341	2.33538e-17	1.56159e-16
P28161	1	0	0		5	0	0				P28161	9.75002	1.62664e-13	1.18377e-12		5.20459	3.65495e-07	1.39204e-06		-4.49845	0.00197964	0.00249057
P28331	1	0	1		4	0	5				P28331	5.42596	1.93385e-11	1.11719e-10		1.09546	0.00078608	0.00153734		-4.37348	1.90583e-10	6.21055e-10
P28340	1	0	1		3	0	7				P28340	4.12262	0.000176312	0.000351419		-1.39462	0.00478119	0.00792823		-6.58468	3.56829e-05	5.77289e-05
P28370	1	1	1		6	6	9				P28370	1.81469	1.47667e-06	4.28038e-06		-1.6914	3.11834e-06	1.00899e-05		-3.31019	2.25288e-16	1.40814e-15
P28482	1	1	1		15	8	15				P28482	5.57836	1.29456e-31	4.44359e-30		1.85073	4.44104e-15	5.22646e-14		-4.22978	5.05886e-24	5.98777e-23
P28676	0	0	1		0	0	2				P28676	3.50496	0.187522	0.223108		-2.43406	0.328101	0.382305		-5.93902	0.00999722	0.0116852
P28827	0	0	1		0	0	2				P28827	6.23397	6.77944e-09	2.79245e-08		-1.48775	0.00107761	0.0020389		-7.72173	3.23539e-09	9.0411e-09
P28838	1	1	1		12	9	18				P28838	4.85861	2.25092e-18	2.72692e-17		1.77872	0.000611342	0.00122477		-3.88584	4.72633e-27	7.18367e-26
P29120	1	0	0		7	0	0				P29120	10.1557	4.26386e-15	3.82633e-14		6.45359	1.61822e-11	1.19026e-10		-3.96299	2.96159e-05	4.86783e-05
P29144	1	1	1		13	10	17				P29144	3.72555	5.77149e-32	2.01464e-30		0.222722	0.265287	0.314904		-3.94181	6.86507e-31	1.45011e-29
P29218	0	1	1		0	2	2				P29218	1.36207	0.00329183	0.00528824		-1.06757	0.112264	0.142019		-2.42964	1.67801e-05	2.85137e-05
P29279	1	1	1		3	3	3				P29279	2.26351	3.73492e-05	8.43428e-05		2.0734	8.13075e-06	2.4042e-05		-0.225952	0.514182	0.531872
P29317	1	1	1		17	16	21				P29317	-0.292816	0.831003	0.868756		-2.48455	4.63455e-29	1.78408e-27		-2.44601	2.45878e-26	3.49232e-25
P29323	0	1	1		0	2	3				P29323	0.020515	0.998397	1		-2.91508	1.90871e-06	6.43371e-06		-2.93559	1.55449e-05	2.65683e-05
P29350	1	0	0		5	0	0				P29350	6.04243	2.49951e-11	1.42794e-10		2.46582	7.91171e-08	3.32534e-07		-3.5766	7.15641e-07	1.46799e-06
P29353	1	0	1		3	0	3				P29353	2.69392	0.000206866	0.0004075		-0.551951	0.0848556	0.109808		-3.24587	9.38983e-06	1.65497e-05
P29372	0	0	1		0	0	3				P29372	3.82311	9.67151e-07	2.89092e-06		-0.822667	0.0208914	0.0305256		-4.64578	9.30307e-08	2.16127e-07
P29401	1	1	1		20	20	22				P29401	1.57706	0.000577313	0.00105546		0.14044	1	1		-3.2223	5.32321e-37	1.94038e-35
P29508	1	1	1		2	6	6				P29508	-2.1167	0.00187277	0.00314213		-1.21881	0.166355	0.204971		1.21846	0.185049	0.197414
P29590	0	0	1		0	0	4				P29590	4.49457	0.000339386	0.000643023		-1.1059	0.0724554	0.095076		-5.8101	4.3595e-06	8.07047e-06
P29692	1	1	1		8	8	8				P29692	1.06037	6.89786e-05	0.000146833		-2.57987	1.0221e-12	8.88196e-12		-3.54369	1.20835e-16	7.68086e-16
P29762	1	0	0		4	0	0				P29762	8.97486	3.29157e-05	7.52384e-05		2.77987	0.0144945	0.0217417		-5.79168	0.00340179	0.00417644
P29966	1	1	1		9	8	9				P29966	1.19189	9.17237e-05	0.000191684		-1.96246	1.72106e-12	1.44675e-11		-3.4626	1.95135e-14	9.94753e-14
P29992	1	1	1		10	11	11				P29992	1.96284	2.96696e-13	2.05739e-12		-0.857801	5.13855e-07	1.89657e-06		-3.24925	2.02169e-19	1.63602e-18
P30038	1	0	1		5	0	4				P30038	6.20318	6.52119e-09	2.71047e-08		1.15045	0.15243	0.188603		-5.05273	1.82353e-09	5.27838e-09
P30040	1	1	1		5	5	7				P30040	-1.33962	0.581033	0.633812		-4.78341	9.72934e-09	4.73923e-08		-1.81509	3.45109e-09	9.61774e-09
P30041	1	1	1		11	11	12				P30041	0.900045	8.77881e-05	0.000183926		-1.07862	2.30158e-05	6.29913e-05		-2.55097	6.28476e-15	3.39723e-14
P30043	1	0	0		2	0	0				P30043	6.21908	1.44879e-07	4.95644e-07		2.18335	0.964685	0.994877		-4.03574	0.000363993	0.000505832
P30044	1	1	1		4	8	8				P30044	-0.644669	0.104104	0.128693		-2.39563	3.26404e-09	1.69012e-08		-2.06343	1.10278e-11	4.14449e-11
P30048	1	1	1		3	5	5				P30048	0.049849	0.999579	1		-2.82663	1.00778e-05	2.93154e-05		-2.31709	8.94131e-06	1.58269e-05
P30050	1	1	1		5	5	5				P30050	1.00196	0.0013242	0.00228026		-1.25523	3.93504e-06	1.25162e-05		-2.46963	3.47805e-08	8.65101e-08
P30084	0	1	1		0	3	4				P30084	0.240409	0.986982	1		-3.30783	0.0274709	0.0390721		-2.62722	4.36248e-05	6.96475e-05
P30085	1	1	1		6	5	6				P30085	3.57946	6.37317e-11	3.47697e-10		0.952821	2.84329e-05	7.59009e-05		-2.84215	2.46263e-09	6.98594e-09
P30086	1	1	1		7	6	7				P30086	3.66907	1.58268e-13	1.15791e-12		-0.226937	0.406274	0.464201		-4.40384	1.99116e-13	9.12303e-13
P30101	1	1	1		25	22	26				P30101	1.89393	3.68517e-08	1.37742e-07		-1.9359	0.00648676	0.0104046		-2.80412	9.038e-31	1.88018e-29
P30153	1	1	1		16	12	16				P30153	5.72027	1.75179e-31	5.96333e-30		1.35159	3.09804e-15	3.6881e-14		-4.01279	1.47811e-29	2.79281e-28
P30154	0	0	1		0	0	3				P30154	2.37019	5.60256e-06	1.47645e-05		-2.45511	7.38161e-06	2.19847e-05		-3.52324	2.81019e-07	6.11796e-07
P30260	0	0	1		0	0	3				P30260	-0.77489	0.0839202	0.105593		-1.31945	0.000145286	0.00033376		-3.93734	9.44405e-05	0.000143596
P30414	0	0	1		0	0	2				P30414	1.79767	0.0899204	0.11251		-2.74321	0.0157594	0.0235704		-4.54088	2.56508e-06	4.86668e-06
P30419	1	1	1		15	10	15				P30419	2.86372	3.19285e-14	2.55863e-13		-0.863026	2.08127e-06	6.96407e-06		-3.61709	2.36462e-22	2.4974e-21
P30481	1	1	1		5	6	6				P30481	-0.0169691	1	1		-3.45796	7.85799e-10	4.57162e-09		-3.26401	1.3864e-08	3.61888e-08
P30505	1	1	1		4	5	5				P30505	-0.395549	0.957963	0.982043		-2.71366	3.47105e-08	1.54065e-07		-2.56198	1.45457e-07	3.27218e-07
P30520	1	1	1		7	5	7				P30520	2.77912	9.56935e-11	5.12564e-10		0.558598	0.0518934	0.069807		-2.31128	6.95405e-09	1.87828e-08
P30530	0	1	1		0	5	5				P30530	-0.928699	0.119728	0.146818		-2.06787	7.47006e-07	2.69197e-06		-2.03932	5.12492e-07	1.06878e-06
P30566	1	1	1		5	8	9				P30566	1.01598	0.0539278	0.0704499		-3.90163	2.81795e-08	1.28256e-07		-3.69888	4.61477e-16	2.79533e-15
P30622	1	0	1		4	0	6				P30622	1.96543	0.000156037	0.000313368		-1.22073	0.459375	0.518205		-3.80668	2.24558e-09	6.40995e-09
P30626	1	1	1		5	6	6				P30626	2.60604	6.53983e-10	3.19165e-09		-0.0645628	0.984538	1		-2.83296	2.71471e-09	7.64836e-09
P30740	0	0	1		0	0	2				P30740	0.666994	0.0385712	0.0515493		-2.16673	0.00053005	0.00107498		-2.83373	5.07927e-05	8.04364e-05
P30825	0	1	1		0	3	3				P30825	-0.0175042	0.999049	1		-1.93405	0.0024149	0.00424359		-2.32208	0.00191343	0.0024126
P30837	0	0	1		0	0	2				P30837	-1.91042	0.436153	0.488449		-5.49388	5.29298e-08	2.29734e-07		-3.58345	0.000723665	0.000962879
P30876	1	1	1		14	6	16				P30876	3.91137	1.14806e-19	1.54539e-18		-0.292602	0.47649	0.535953		-4.61155	9.72294e-25	1.2399e-23
P31025	0	1	0		0	2	0				P31025	-6.31226	0.0133211	0.0193134		-0.711421	0.858441	0.904096		5.60084	0.0316878	0.0355258
P31040	1	0	1		4	0	7				P31040	4.22704	0.000159021	0.000318738		-1.37404	0.510763	0.571073		-4.35895	2.69381e-07	5.87703e-07
P31146	1	0	1		4	0	4				P31146	9.01321	1.88595e-13	1.35638e-12		5.01063	1.18482e-09	6.73141e-09		-5.17061	0.000240832	0.000343843
P31150	1	1	1		11	10	11				P31150	3.68274	3.15432e-19	4.04755e-18		0.0751095	0.997609	1		-3.60763	5.01232e-20	4.39271e-19
P31151	0	1	0		0	2	0				P31151	-4.50495	0.000947646	0.00167814		-2.56493	0.263598	0.313082		1.94002	0.28038	0.295292
P31153	1	1	1		10	9	10				P31153	4.36596	1.31883e-19	1.75802e-18		2.12691	2.36961e-13	2.24894e-12		-2.28625	1.50442e-13	6.96261e-13
P31323	1	0	0		5	0	0				P31323	4.32154	4.52378e-13	3.06976e-12		1.32606	0.000298921	0.00064329		-2.99548	1.04457e-06	2.09167e-06
P31350	0	1	1		0	6	8				P31350	0.710875	0.0679678	0.0870791		-3.21343	1.28754e-10	8.48538e-10		-3.97992	1.6419e-17	1.11234e-16
P31431	1	1	1		4	3	4				P31431	1.82083	0.0011716	0.00203965		-1.46971	0.000971729	0.00185132		-3.09907	3.32393e-07	7.15697e-07
P31689	1	1	1		8	7	10				P31689	2.40284	1.67964e-09	7.63625e-09		-1.15064	5.09891e-07	1.88532e-06		-4.73977	2.06284e-14	1.04384e-13
P31749	1	0	0		3	0	0				P31749	7.49329	3.91978e-05	8.77953e-05		2.45363	2.84691e-07	1.09593e-06		-4.72223	0.00303041	0.00374281
P31930	0	1	1		0	2	2				P31930	2.86967	7.22672e-05	0.000153517		-1.20686	0.00175842	0.00317534		-4.07653	3.09834e-06	5.83274e-06
P31937	1	1	1		3	2	3				P31937	5.43414	4.05759e-09	1.72836e-08		2.79572	5.03469e-09	2.53838e-08		-3.81531	1.7268e-06	3.35147e-06
P31939	1	1	1		21	17	25				P31939	5.32246	1.57039e-28	4.37055e-27		1.85633	2.77645e-07	1.07181e-06		-4.53102	1.39243e-35	4.28016e-34
P31942	1	1	1		6	6	7				P31942	1.03627	0.0476922	0.0627812		-3.07887	7.65666e-12	5.88391e-11		-3.3846	1.01224e-10	3.40085e-10
P31943	1	1	1		10	7	10				P31943	2.47244	1.654e-11	9.58201e-11		-0.863137	0.000786397	0.00153734		-3.15378	1.16417e-16	7.42295e-16
P31944	1	1	1		4	10	6				P31944	-1.29474	0.496574	0.551318		-0.148816	1	1		1.31733	0.0296409	0.0332763
P31946	1	1	1		14	15	15				P31946	2.94722	3.59424e-21	5.52413e-20		-0.258262	0.374982	0.431439		-3.2307	1.23213e-24	1.56158e-23
P31947	1	1	1		5	8	8				P31947	-0.971139	0.0134771	0.0195122		-2.84022	1.38653e-13	1.35335e-12		-2.38088	1.06337e-11	4.00004e-11
P31948	1	1	1		21	18	25				P31948	1.78456	2.04558e-17	2.27723e-16		-0.576952	0.0227453	0.0330236		-2.58218	1.03003e-25	1.41896e-24
P31949	1	1	1		4	5	5				P31949	-0.768191	0.0679627	0.0870791		-4.39814	6.22226e-14	6.28174e-13		-3.4156	8.22222e-10	2.49208e-09
P32004	1	1	1		4	11	13				P32004	0.10057	0.999999	1		-2.15925	4.90425e-16	6.43331e-15		-2.81438	3.37808e-16	2.08298e-15
P32119	1	1	1		6	6	7				P32119	0.0943994	0.981102	1		-2.45394	6.2488e-11	4.30415e-10		-2.6526	5.18533e-10	1.6071e-09
P32322	1	0	1		4	0	5				P32322	6.24581	7.46588e-13	4.96e-12		2.58729	5.95062e-11	4.10563e-10		-4.39846	1.31746e-07	2.98001e-07
P32455	0	0	1		0	0	4				P32455	-1.55716	0.37161	0.420858		-8.1429	5.18881e-06	1.60335e-05		-6.58573	3.73504e-07	7.96306e-07
P32969	1	1	1		6	5	6				P32969	3.15016	4.59253e-10	2.27363e-09		0.046165	0.958956	0.991949		-3.36959	1.6025e-09	4.67141e-09
P32970	1	1	1		2	2	3				P32970	-0.874313	0.0815654	0.102805		-3.17156	4.13587e-06	1.30943e-05		-2.29724	9.61928e-05	0.000146044
P33121	1	0	0		2	0	0				P33121	8.69545	2.83802e-10	1.43609e-09		3.38363	1.01217e-06	3.5756e-06		-5.31182	6.56303e-08	1.56714e-07
P33176	1	1	1		26	22	29				P33176	3.8012	7.00694e-41	4.37297e-39		0.704749	5.8403e-07	2.13453e-06		-3.49688	5.8229e-41	2.57898e-39
P33240	0	1	1		0	2	2				P33240	1.75199	0.0144288	0.0207587		-1.65488	0.00847482	0.013283		-3.40686	2.39351e-05	3.99954e-05
P33316	0	1	1		0	2	4				P33316	1.38691	0.0522946	0.0685337		-2.26721	0.0139417	0.0210274		-4.17062	9.5467e-07	1.92324e-06
P33527	1	1	1		17	21	26				P33527	0.712578	9.80005e-06	2.46738e-05		-1.89331	5.86658e-24	1.58977e-22		-2.80343	5.21732e-31	1.11348e-29
P33991	1	1	1		14	20	26				P33991	0.373438	0.426716	0.47827		-3.37354	1.47546e-32	7.79156e-31		-3.84217	2.65287e-44	1.47664e-42
P33992	1	1	1		14	12	28				P33992	2.46671	1.13784e-15	1.05796e-14		-3.7371	1.51865e-41	1.33092e-39		-6.0618	3.86089e-53	3.38362e-51
P33993	1	1	1		20	22	28				P33993	0.739956	0.00226451	0.00374149		-4.07432	7.83487e-44	8.27483e-42		-4.7681	5.84029e-50	4.29574e-48
P34896	1	1	1		6	6	9				P34896	1.37157	2.55836e-07	8.38335e-07		-3.2775	7.13605e-15	8.23345e-14		-4.58133	5.56043e-22	5.71157e-21
P34897	1	1	1		15	12	17				P34897	2.24089	2.78582e-13	1.94488e-12		-1.55632	4.31384e-12	3.4747e-11		-3.70606	5.53871e-30	1.09158e-28
P34913	1	0	0		3	0	0				P34913	11.6901	1.1991e-08	4.79057e-08		11.3129	4.82235e-05	0.000122992		-1.67797	0.657372	0.674735
P34932	1	1	1		22	21	27				P34932	2.86596	1.96132e-21	3.07173e-20		-0.334122	0.52036	0.5807		-3.04407	8.65418e-35	2.45838e-33
P34949	1	0	0		3	0	0				P34949	9.62936	7.02681e-08	2.5256e-07		4.62232	0.00185834	0.00333542		-5.15554	0.00925014	0.0108489
P35052	1	1	1		9	8	9				P35052	1.71571	8.09729e-07	2.44342e-06		-0.210897	0.64019	0.700197		-2.05508	1.49899e-10	4.94343e-10
P35080	1	1	1		4	2	4				P35080	4.35916	5.93002e-10	2.90437e-09		-0.682682	0.00185841	0.00333542		-5.5573	1.17026e-10	3.91258e-10
P35221	1	1	1		21	18	24				P35221	1.27154	5.00956e-11	2.77344e-10		-1.61986	5.79565e-22	1.36413e-20		-2.74539	1.15371e-32	2.91543e-31
P35222	1	1	1		13	10	13				P35222	2.88495	3.27204e-17	3.56548e-16		-0.28697	0.0322801	0.0451482		-3.33096	3.735e-16	2.28595e-15
P35232	1	1	1		6	8	8				P35232	0.73726	0.0932918	0.116445		-2.77528	3.41871e-13	3.17154e-12		-3.30483	6.33148e-11	2.18237e-10
P35237	0	1	1		0	5	6				P35237	-0.098179	0.9797	0.999704		-2.8622	6.28457e-06	1.90199e-05		-2.84438	2.72825e-11	9.7634e-11
P35240	0	1	1		0	3	5				P35240	2.48674	0.0194602	0.0273106		-3.51839	0.0102303	0.0158177		-3.71705	1.13635e-07	2.59601e-07
P35241	1	1	1		22	23	23				P35241	1.45818	1.72785e-15	1.59218e-14		-0.390232	0.095709	0.12285		-1.744	2.99248e-18	2.19324e-17
P35244	1	1	1		2	3	3				P35244	-0.878785	0.171661	0.20538		-3.21262	2.81088e-05	7.51332e-05		-3.21745	0.000111494	0.000167978
P35249	0	1	1		0	4	5				P35249	2.57539	0.0594289	0.0770742		-2.14574	0.0013929	0.00257576		-3.27229	7.01682e-08	1.66201e-07
P35250	0	1	1		0	3	3				P35250	1.04269	0.0291088	0.0397017		-1.87843	4.03533e-06	1.28154e-05		-2.6735	4.89415e-07	1.0233e-06
P35268	1	1	1		3	3	5				P35268	3.67458	1.46537e-08	5.79258e-08		-2.98156	5.23688e-10	3.12166e-09		-5.82934	1.78099e-14	9.15844e-14
P35269	1	1	1		7	8	11				P35269	1.83827	3.51613e-08	1.31903e-07		-3.00867	8.28937e-18	1.39934e-16		-4.73379	1.99629e-24	2.49174e-23
P35270	0	1	1		0	3	5				P35270	3.1886	0.000809866	0.0014491		-1.24377	0.0756377	0.0987799		-3.82001	3.73107e-07	7.96284e-07
P35527	1	1	1		36	38	39				P35527	-1.89747	8.76548e-23	1.57664e-21		-1.00055	0.00577127	0.00935164		0.934553	7.038e-05	0.000109312
P35555	1	1	1		4	6	6				P35555	-1.08962	0.000165414	0.000331068		-1.49955	0.000119256	0.000279894		-0.00457399	0.999997	1
P35556	0	1	1		0	7	5				P35556	-2.93359	6.15384e-05	0.000132088		-1.75464	5.86452e-05	0.000146934		0.19747	0.940171	0.947996
P35573	1	1	1		16	9	19				P35573	6.18107	3.00913e-30	9.38984e-29		2.19889	1.78923e-16	2.52392e-15		-5.9866	3.49384e-19	2.76221e-18
P35579	1	1	1		73	83	90				P35579	0.0837328	1	1		-2.44763	5.58507e-111	5.75123e-108		-2.72295	4.82313e-94	1.41903e-91
P35580	1	1	1		31	34	38				P35580	0.641458	0.000110398	0.000227478		-2.19161	2.01497e-33	1.13694e-31		-2.87726	3.72963e-48	2.51842e-46
P35606	1	1	1		31	24	31				P35606	4.36645	4.92927e-48	5.48748e-46		0.885633	1.11831e-12	9.65683e-12		-3.51574	6.85378e-43	3.57351e-41
P35611	1	1	1		9	6	11				P35611	4.36638	9.89712e-17	1.03206e-15		0.38911	0.548007	0.608257		-5.43349	1.78773e-19	1.45815e-18
P35612	1	0	0		3	0	0				P35612	7.51197	0.00018124	0.000360294		6.32237	2.49544e-05	6.77121e-05		-1.89354	0.496887	0.514609
P35613	1	1	1		7	7	7				P35613	1.04205	0.000695128	0.00125801		-1.83283	1.98036e-10	1.2686e-09		-2.98218	4.40805e-13	1.92339e-12
P35637	1	1	1		6	6	7				P35637	1.6487	1.18572e-07	4.1111e-07		-1.78756	2.56377e-07	9.95305e-07		-3.68995	1.67827e-11	6.21097e-11
P35658	1	1	1		4	4	9				P35658	2.41692	1.75064e-07	5.92514e-07		-1.30489	8.54625e-05	0.00020713		-3.34676	1.15354e-16	7.36655e-16
P35659	1	1	1		6	8	10				P35659	0.817608	0.0223184	0.0309527		-4.5251	8.97104e-18	1.5021e-16		-5.33226	4.21116e-24	5.02776e-23
P35749	1	0	0		9	0	0				P35749	3.04185	7.40132e-08	2.65789e-07		1.33889	0.00288591	0.0050199		-2.2251	0.00207414	0.00260231
P35813	1	0	1		3	0	3				P35813	3.75679	5.79279e-05	0.000125516		0.808474	0.0204733	0.0299572		-2.41126	0.00183771	0.00232265
P35908	1	1	1		37	43	43				P35908	-1.50943	8.32722e-17	8.74996e-16		-0.808496	0.0104995	0.0162037		0.616227	0.793308	0.807622
P35998	1	1	1		24	21	24				P35998	4.51799	1.31989e-44	1.18187e-42		1.17882	1.97238e-17	3.18008e-16		-3.36227	2.60895e-36	8.8084e-35
P36404	1	1	1		4	3	5				P36404	3.74643	1.63746e-12	1.05716e-11		1.24978	0.000107202	0.000254652		-3.54883	1.25371e-11	4.68182e-11
P36405	1	1	1		7	4	5				P36405	5.73209	4.25145e-20	5.87642e-19		2.89381	1.55915e-11	1.15092e-10		-2.77474	1.96423e-13	9.00964e-13
P36507	1	1	1		4	2	6				P36507	5.35086	9.6942e-15	8.30154e-14		1.81601	9.71354e-11	6.5163e-10		-5.1832	1.91294e-11	6.99149e-11
P36542	1	1	1		6	2	6				P36542	6.45844	8.19785e-14	6.24158e-13		0.91749	2.14234e-05	5.90253e-05		-6.14328	1.03858e-14	5.46346e-14
P36543	1	1	1		11	7	10				P36543	4.91806	5.3006e-18	6.23805e-17		3.06654	2.12465e-16	2.94661e-15		-2.12165	5.46939e-07	1.13837e-06
P36551	1	0	1		6	0	6				P36551	5.06294	1.08465e-11	6.41907e-11		2.66004	1.00385e-08	4.85883e-08		-3.47066	3.87983e-08	9.56875e-08
P36578	1	1	1		21	18	23				P36578	1.8254	3.84215e-17	4.15376e-16		-2.10479	9.19148e-32	4.56141e-30		-3.87001	1.0946e-41	5.18234e-40
P36639	0	1	1		0	3	4				P36639	-0.257467	0.894474	0.927578		-3.03606	0.000469375	0.000966194		-3.11862	1.65719e-07	3.6997e-07
P36776	1	0	1		8	0	9				P36776	6.47257	3.25042e-20	4.56945e-19		1.68927	1.35978e-09	7.6597e-09		-4.53681	4.62776e-15	2.54836e-14
P36871	1	1	1		23	15	26				P36871	7.13801	4.87988e-48	5.48748e-46		3.42685	1.94306e-24	5.48184e-23		-4.08783	4.05217e-42	1.98701e-40
P36873	1	1	1		6	5	6				P36873	3.8151	1.37293e-12	8.93379e-12		-0.172679	0.53283	0.593009		-4.16008	1.77392e-13	8.18228e-13
P36915	1	1	1		13	5	14				P36915	5.8377	4.22537e-22	6.96172e-21		0.673512	5.90669e-06	1.80086e-05		-5.1192	1.29991e-20	1.20052e-19
P36955	0	1	0		0	4	0				P36955	-0.93428	0.18623	0.221763		-0.0290842	0.977798	1		2.08929	0.00023865	0.000340964
P36957	0	1	1		0	2	2				P36957	1.91962	0.000384567	0.000721655		0.0349098	0.890065	0.933583		-1.88471	0.000114791	0.0001725
P36969	1	0	1		3	0	2				P36969	8.27206	1.27722e-05	3.15022e-05		2.06358	1.56321e-06	5.34347e-06		-2.41629	0.0036016	0.00441123
P37108	1	1	1		6	6	8				P37108	0.0786117	0.992026	1		-3.51316	9.67974e-15	1.1014e-13		-3.47415	1.30997e-15	7.67531e-15
P37198	1	0	1		3	0	4				P37198	5.55963	0.00190714	0.0031946		-1.22833	0.329991	0.384398		-7.71137	9.72991e-08	2.25408e-07
P37235	1	1	1		8	9	10				P37235	1.54693	4.05805e-06	1.09392e-05		-2.01158	7.40918e-15	8.50095e-14		-3.38502	1.35217e-15	7.91134e-15
P37802	1	1	1		11	11	12				P37802	1.24748	3.86354e-08	1.43887e-07		-3.32482	4.12011e-26	1.25709e-24		-4.28255	1.76344e-27	2.7937e-26
P37837	1	1	1		10	9	13				P37837	2.47353	1.1283e-06	3.32675e-06		-3.68935	5.16513e-17	7.85061e-16		-4.9401	7.1226e-28	1.18777e-26
P38117	1	1	1		8	6	9				P38117	5.55819	1.3082e-20	1.90406e-19		1.93054	9.84137e-12	7.45158e-11		-3.6341	6.4565e-19	5.0178e-18
P38159	1	1	1		10	12	14				P38159	0.43975	0.70818	0.755698		-3.32869	2.04834e-19	3.92424e-18		-3.86518	2.44551e-24	2.99793e-23
P38432	0	0	1		0	0	2				P38432	2.10975	0.0125847	0.0182973		-1.5214	0.00486346	0.00804845		-3.63115	1.93547e-06	3.7323e-06
P38571	0	0	1		0	0	2				P38571	-1.01054	0.924719	0.955095		-5.50435	0.000408071	0.000852355		-4.49381	9.02157e-06	1.59469e-05
P38606	1	1	1		29	20	24				P38606	6.11419	2.12983e-60	5.48298e-58		3.51164	2.61458e-53	4.1421e-51		-2.78337	2.56262e-27	3.9682e-26
P38646	1	1	1		26	24	27				P38646	2.21511	4.62249e-34	1.79623e-32		-0.773664	3.26617e-09	1.69012e-08		-2.98069	3.91992e-44	2.15282e-42
P38919	1	1	1		18	15	17				P38919	2.64694	2.83904e-21	4.37978e-20		-1.12437	3.21766e-14	3.35532e-13		-3.92566	1.37047e-29	2.61341e-28
P39019	1	1	1		9	8	10				P39019	-0.861675	0.00440159	0.00691726		-2.5835	1.7759e-15	2.1578e-14		-1.8282	1.01765e-09	3.05516e-09
P39023	1	1	1		12	11	16				P39023	1.57138	0.000201183	0.000397254		-2.9897	4.2473e-28	1.52127e-26		-4.31549	2.83241e-28	4.87179e-27
P39060	1	1	1		5	6	5				P39060	-1.35028	0.00385553	0.00611981		-0.381201	0.181295	0.221786		0.934513	0.00692356	0.00822085
P39656	1	1	1		4	3	6				P39656	2.1968	1.47613e-08	5.82391e-08		0.437131	0.353685	0.409567		-3.3864	5.81463e-10	1.79539e-09
P39748	1	1	1		8	7	9				P39748	1.6214	7.00671e-07	2.13624e-06		-2.39897	2.23731e-13	2.13321e-12		-3.96497	8.31173e-20	7.0882e-19
P40121	0	1	1		0	9	11				P40121	0.364614	0.839716	0.876308		-2.90998	5.69394e-08	2.45842e-07		-2.36654	1.24528e-14	6.48459e-14
P40123	1	1	1		4	5	5				P40123	2.00796	1.07208e-07	3.73281e-07		-0.935425	0.000337344	0.000718099		-2.97451	4.4038e-10	1.37523e-09
P40189	0	1	1		0	7	8				P40189	0.832267	0.427679	0.47922		-2.92518	3.90206e-05	0.00010204		-2.9971	7.71155e-11	2.63382e-10
P40222	0	0	1		0	0	3				P40222	5.92449	1.75529e-08	6.85312e-08		0.0442066	0.998474	1		-6.05	1.0551e-05	1.84073e-05
P40227	1	1	1		21	20	22				P40227	2.63878	1.01378e-26	2.42777e-25		-0.252143	0.201656	0.244877		-2.96011	3.31504e-30	6.66081e-29
P40261	1	1	1		7	7	7				P40261	-0.252792	0.535916	0.590066		-3.87688	4.48719e-15	5.26573e-14		-3.65443	8.88243e-16	5.26428e-15
P40429	1	1	1		6	10	10				P40429	-0.661464	0.0566714	0.0738		-2.9802	3.69192e-16	4.96962e-15		-2.99765	1.03903e-13	4.90801e-13
P40616	1	1	1		5	4	6				P40616	3.75248	4.74394e-08	1.75249e-07		1.41363	3.15547e-05	8.35307e-05		-2.03994	0.000126777	0.000188927
P40763	1	1	1		18	11	18				P40763	3.47976	1.24276e-25	2.8432e-24		-0.692889	0.000386913	0.00081104		-4.60267	1.66788e-29	3.12272e-28
P40818	0	0	1		0	0	5				P40818	1.41208	0.010353	0.015272		-2.55468	2.77758e-09	1.46866e-08		-4.2133	8.41907e-12	3.205e-11
P40925	1	1	1		6	6	9				P40925	2.14903	4.24192e-07	1.34507e-06		-2.45638	4.72676e-06	1.47496e-05		-2.93819	1.08186e-14	5.66223e-14
P40926	1	1	1		9	8	10				P40926	2.79865	1.04673e-08	4.20224e-08		1.18359	0.0015448	0.00282927		-3.86684	1.47321e-18	1.11534e-17
P40938	1	1	1		2	2	2				P40938	0.948568	0.0182503	0.0257706		-2.23361	7.75432e-06	2.29784e-05		-3.18218	4.19768e-06	7.7849e-06
P40939	1	1	1		6	11	12				P40939	2.56477	5.06673e-07	1.57746e-06		-0.960124	0.00362177	0.00614166		-4.18783	1.79532e-19	1.46145e-18
P41221	0	1	1		0	4	6				P41221	-3.14054	0.0168393	0.0239432		-6.71393	1.08433e-08	5.21772e-08		-3.2577	1.24396e-08	3.26987e-08
P41223	1	1	1		3	2	3				P41223	1.61622	0.0163759	0.0233399		-1.52539	0.00232599	0.00409973		-2.8988	8.4754e-07	1.72396e-06
P41227	1	1	1		7	5	7				P41227	2.7551	9.84769e-10	4.64635e-09		-0.0838788	0.969372	0.998809		-2.60085	3.39875e-11	1.19756e-10
P41240	1	1	1		5	4	4				P41240	4.59448	1.58574e-11	9.21253e-11		1.17507	1.8469e-05	5.15404e-05		-3.22675	8.48349e-10	2.5656e-09
P41250	1	1	1		15	9	17				P41250	4.34962	1.27072e-21	2.01311e-20		1.48267	7.34358e-08	3.10238e-07		-3.89971	3.13132e-24	3.77132e-23
P41252	1	1	1		18	25	31				P41252	0.725896	0.0013989	0.00239786		-2.7376	5.80205e-27	1.82432e-25		-3.85409	6.38536e-49	4.45785e-47
P41440	0	1	1		0	3	3				P41440	0.148244	0.818817	0.857759		-2.0143	0.000349547	0.000742924		-2.16254	0.000274889	0.000388561
P41743	0	1	1		0	2	2				P41743	0.769824	0.14065	0.170595		-1.4137	0.000762652	0.00149874		-2.18352	1.4324e-05	2.46246e-05
P42166	1	1	1		4	8	10				P42166	-0.00444452	0.999999	1		-2.42238	5.29332e-11	3.67676e-10		-2.52282	1.04142e-14	5.47144e-14
P42224	1	1	1		21	16	23				P42224	4.6406	5.8087e-42	3.98767e-40		0.769054	8.71869e-08	3.63117e-07		-3.52886	1.20577e-36	4.28152e-35
P42226	0	0	1		0	0	2				P42226	5.33026	3.03448e-07	9.81083e-07		-3.20305	0.00813249	0.0128049		-8.53331	2.105e-09	6.02955e-09
P42285	1	1	1		7	9	11				P42285	2.0893	3.36934e-14	2.67921e-13		-1.77346	1.10845e-12	9.59186e-12		-3.82538	1.04742e-20	9.76095e-20
P42345	1	1	1		11	7	13				P42345	2.71139	1.85469e-14	1.53021e-13		-0.432795	0.0281454	0.0398937		-2.84882	7.03502e-20	6.02437e-19
P42356	1	1	1		9	7	14				P42356	2.13529	6.78529e-12	4.11614e-11		-0.579761	0.000190641	0.00042538		-4.01519	1.28249e-19	1.07369e-18
P42357	0	1	0		0	4	0				P42357	-3.69402	0.0154009	0.0220647		-2.28338	0.140896	0.175386		2.08243	0.0937372	0.101446
P42677	1	1	1		2	3	3				P42677	0.617983	0.168225	0.201754		-0.70052	0.00706932	0.0112419		-1.3185	0.00407585	0.00496993
P42695	0	0	1		0	0	3				P42695	2.84994	0.00261019	0.0042749		-2.71733	0.000124532	0.000291446		-4.06266	1.63352e-08	4.21055e-08
P42704	1	1	1		6	9	13				P42704	2.19253	0.000744057	0.00133774		-2.02548	3.06684e-08	1.37757e-07		-3.92528	1.99828e-26	2.87794e-25
P42765	1	0	1		5	0	6				P42765	6.66573	1.11842e-09	5.2172e-09		4.06747	0.191716	0.233909		-3.11022	1.34645e-13	6.28803e-13
P42766	1	1	1		2	3	4				P42766	-1.17055	0.123944	0.151401		-4.5542	7.46778e-09	3.69265e-08		-3.63427	5.83914e-07	1.21166e-06
P42771	0	1	1		0	4	5				P42771	-1.21623	0.000282525	0.000543541		-5.37574	2.66069e-10	1.66809e-09		-2.6454	7.82398e-09	2.09266e-08
P42785	0	1	1		0	5	9				P42785	2.22169	3.10222e-05	7.13458e-05		-2.34003	2.82376e-07	1.08803e-06		-4.56172	2.19057e-15	1.26019e-14
P42858	0	0	1		0	0	4				P42858	0.850528	0.668147	0.719127		-4.11262	0.00013811	0.000319413		-5.55841	5.89471e-09	1.60055e-08
P42892	1	1	1		10	13	14				P42892	0.815174	0.00756785	0.0114225		-2.15182	2.07052e-12	1.72293e-11		-3.07974	8.03646e-18	5.66818e-17
P43007	1	1	1		5	6	7				P43007	-0.406044	0.211506	0.24984		-2.768	2.58868e-08	1.18344e-07		-2.54383	2.04802e-09	5.88729e-09
P43034	1	1	1		15	8	13				P43034	6.71195	1.68751e-25	3.75721e-24		3.53414	7.97384e-24	2.14668e-22		-3.30695	7.41712e-19	5.72118e-18
P43121	1	1	1		10	10	10				P43121	-0.262086	0.621785	0.673628		-2.12021	1.43673e-14	1.59943e-13		-2.04427	1.02116e-13	4.83466e-13
P43155	1	0	1		4	0	8				P43155	5.22361	4.84007e-11	2.68321e-10		0.564189	0.282067	0.332999		-4.70074	1.95391e-11	7.12226e-11
P43243	1	1	1		11	8	11				P43243	2.22493	4.11262e-13	2.81393e-12		-0.652675	5.19759e-06	1.60486e-05		-2.51858	2.32447e-15	1.32979e-14
P43246	1	1	1		9	11	17				P43246	1.42061	2.92306e-07	9.49534e-07		-1.89731	5.77928e-14	5.86327e-13		-3.39887	1.33942e-24	1.69235e-23
P43307	1	0	1		3	0	3				P43307	2.0716	0.000739608	0.00133207		-0.157574	0.693507	0.750541		-2.15977	0.000193141	0.00027963
P43378	1	0	0		2	0	0				P43378	6.62739	4.37013e-05	9.69683e-05		2.26671	6.79324e-06	2.04287e-05		-4.36067	0.000546343	0.000738558
P43487	1	1	1		4	4	4				P43487	1.00523	0.000924579	0.00164153		0.0511334	0.829825	0.877323		-0.604164	0.0177057	0.0202021
P43490	1	1	1		6	5	7				P43490	1.91854	3.68435e-09	1.58141e-08		-0.11669	0.833612	0.88025		-3.20382	1.71102e-11	6.32648e-11
P43686	1	1	1		19	13	18				P43686	4.26274	5.97432e-31	1.95932e-29		1.12121	3.46564e-10	2.12742e-09		-3.2728	6.31581e-23	6.88223e-22
P43897	0	0	1		0	0	2				P43897	1.37037	0.0414357	0.0550206		-3.43897	0.462459	0.521453		-4.80935	0.000173092	0.000252667
P45880	1	1	1		6	6	6				P45880	2.87998	2.35245e-09	1.04303e-08		0.00111051	1	1		-2.69405	6.36741e-10	1.95727e-09
P45954	1	0	0		2	0	0				P45954	13.5338	5.82565e-11	3.1867e-10		6.00633	1.23869e-08	5.92584e-08		-7.52743	1.68071e-07	3.74209e-07
P45973	1	1	1		3	3	3				P45973	1.05948	0.000792618	0.00142009		-1.90803	2.029e-06	6.79468e-06		-3.91277	6.96488e-08	1.65255e-07
P45974	1	1	1		21	20	21				P45974	3.81107	2.10856e-34	8.43219e-33		0.650297	6.42441e-08	2.74219e-07		-3.22992	3.02857e-32	7.12839e-31
P45985	1	0	1		6	0	5				P45985	7.60098	2.06462e-09	9.22362e-09		2.81765	1.68036e-06	5.70601e-06		-4.79999	4.73782e-05	7.52896e-05
P46013	0	0	1		0	0	9				P46013	0.514579	0.989895	1		-4.10155	1.95321e-14	2.15114e-13		-6.48646	2.88566e-21	2.80331e-20
P46060	1	1	1		5	7	12				P46060	1.20375	0.0220801	0.0306532		-2.30024	7.65855e-07	2.75027e-06		-3.64487	4.50721e-18	3.25135e-17
P46063	1	1	1		13	13	17				P46063	-0.319351	0.939488	0.966713		-4.14347	8.26206e-19	1.49918e-17		-4.00678	1.55844e-29	2.93116e-28
P46087	1	1	1		4	14	17				P46087	-1.21348	0.010073	0.0148925		-3.88803	3.49536e-20	7.05754e-19		-2.75359	1.33254e-23	1.53746e-22
P46100	0	0	1		0	0	2				P46100	1.6083	0.00328143	0.00527565		-3.13899	5.69128e-06	1.74163e-05		-4.74729	5.04431e-07	1.0531e-06
P46109	0	0	1		0	0	2				P46109	3.48703	0.00128397	0.00222027		-0.375508	0.269739	0.319728		-3.86254	0.000191279	0.00027713
P46379	1	1	1		9	8	11				P46379	2.7766	4.60732e-14	3.6079e-13		-0.455442	0.0645913	0.0856022		-3.07634	9.47152e-17	6.0863e-16
P46439	1	0	0		2	0	0
P46459	1	1	1		31	20	28				P46459	6.39462	2.38102e-58	5.76906e-56		2.72767	5.7875e-41	4.9664e-39		-3.50981	1.53506e-32	3.74137e-31
P46734	0	0	1		0	0	2				P46734	1.42674	0.0069612	0.0105727		-2.62682	1.9728e-05	5.4794e-05		-4.05356	2.40923e-05	4.02418e-05
P46736	0	1	1		0	2	2				P46736	-1.43702	0.00719448	0.0109109		-2.16973	0.00676043	0.0107889		-0.732709	0.296746	0.311731
P46776	1	1	1		2	2	2				P46776	1.13871	0.00609308	0.00934379		-2.28497	1.02444e-05	2.9779e-05		-3.42368	1.42196e-06	2.79174e-06
P46777	1	1	1		12	11	13				P46777	2.20085	1.74002e-10	9.03803e-10		0.385896	0.995023	1		-1.90097	1.35017e-13	6.29826e-13
P46778	1	1	1		5	5	5				P46778	1.77269	0.00645363	0.00985997		-2.23881	9.45078e-08	3.90058e-07		-4.5978	2.65062e-11	9.51867e-11
P46779	1	1	1		6	5	6				P46779	1.59158	6.65398e-07	2.03624e-06		-1.84723	8.12038e-08	3.4061e-07		-3.47497	6.33306e-13	2.706e-12
P46781	1	1	1		15	12	16				P46781	1.2246	6.89773e-11	3.74825e-10		-2.90277	6.19248e-22	1.44925e-20		-4.04522	7.01178e-29	1.25028e-27
P46782	1	1	1		6	6	6				P46782	1.48429	1.72556e-05	4.16622e-05		-1.05488	0.000578942	0.00116319		-2.27108	3.91066e-09	1.0789e-08
P46783	1	1	1		9	5	9				P46783	1.45608	2.28374e-10	1.16564e-09		-2.41348	7.34023e-11	4.98096e-10		-3.76339	3.04893e-11	1.08077e-10
P46821	1	1	1		20	20	24				P46821	3.15317	1.68318e-38	8.35301e-37		2.18246	8.43157e-25	2.46309e-23		-1.11109	1.16595e-09	3.46753e-09
P46926	1	1	1		4	2	4				P46926	4.13436	2.58484e-09	1.14115e-08		0.171139	0.690816	0.747825		-2.96279	5.86154e-08	1.40944e-07
P46934	0	0	1		0	0	2				P46934	1.76466	0.0205347	0.0286915		-1.11377	0.0222989	0.0324098		-2.87843	5.40827e-05	8.53184e-05
P46939	1	1	1		20	43	58				P46939	0.86067	0.000294178	0.000565432		-2.40671	8.26596e-50	1.21598e-47		-3.21747	1.91559e-70	3.94515e-68
P46940	1	1	1		60	65	71				P46940	0.844486	3.31741e-22	5.53216e-21		-1.37997	1.6283e-58	3.52999e-56		-2.40327	1.89314e-81	4.87364e-79
P46976	0	1	1		0	2	4				P46976	1.72278	0.523459	0.578361		-3.36165	0.229401	0.275803		-5.2115	0.00349459	0.00428783
P46977	1	1	1		6	6	7				P46977	2.45075	5.29047e-12	3.25245e-11		0.557537	0.0911191	0.117214		-2.36283	9.72798e-06	1.7082e-05
P47736	1	0	0		2	0	0				P47736	8.56117	0.000517068	0.000954212		3.12167	0.00404722	0.00680707		-5.43949	0.0120421	0.0139565
P47755	1	1	1		7	7	7				P47755	4.0488	8.85458e-14	6.69211e-13		0.566551	0.00236554	0.00416218		-3.34165	1.85964e-13	8.54896e-13
P47756	1	1	1		6	6	6				P47756	1.97109	2.2993e-08	8.85122e-08		-0.902461	9.71609e-05	0.000232543		-3.02992	4.47855e-12	1.75855e-11
P47897	1	1	1		12	14	22				P47897	1.35756	3.66328e-09	1.5767e-08		-2.68254	1.6532e-23	4.30982e-22		-4.56308	2.41684e-35	7.06027e-34
P47914	0	1	1		0	2	2				P47914	0.675206	0.0267241	0.0366189		-3.34708	5.53933e-06	1.69766e-05		-4.02229	1.17389e-06	2.33813e-06
P47929	0	1	0		0	3	0				P47929	0.0481066	0.992552	1		0.621433	0.760642	0.814846		2.40107	0.379005	0.395722
P48047	0	0	1		0	0	5				P48047	0.62	0.240645	0.281916		-1.28327	4.70516e-05	0.000120376		-3.72403	1.7191e-05	2.91759e-05
P48147	1	1	1		11	8	12				P48147	4.23648	5.76874e-18	6.75031e-17		0.531518	0.000495502	0.0010139		-4.07483	9.89419e-21	9.24131e-20
P48163	1	1	1		6	4	7				P48163	4.73957	5.20742e-10	2.56571e-09		1.58035	0.000175633	0.000395967		-2.97314	1.17759e-06	2.34436e-06
P48426	1	1	1		2	2	2				P48426	2.71936	1.81867e-05	4.37053e-05		0.653723	0.0224254	0.032582		-2.06563	7.7771e-05	0.000119842
P48444	1	1	1		14	9	14				P48444	5.08515	5.22346e-28	1.3792e-26		1.799	1.33084e-14	1.49774e-13		-2.79496	1.48852e-19	1.23364e-18
P48449	1	1	1		2	3	5				P48449	1.5225	0.0262402	0.0360397		-1.4817	0.000121391	0.000284257		-4.16234	6.98885e-08	1.65729e-07
P48506	1	0	0		6	0	0				P48506	8.42891	1.97957e-13	1.40584e-12		5.93265	2.0066e-11	1.46806e-10		-2.5632	0.00832787	0.00981473
P48507	0	1	1		0	2	2				P48507	-0.719921	0.0674363	0.0865328		-3.0119	9.44371e-06	2.76662e-05		-2.29198	0.000113499	0.00017087
P48509	1	1	1		2	3	4				P48509	-0.109105	0.92658	0.956297		-3.54261	8.86274e-08	3.68371e-07		-3.14422	5.69321e-09	1.5489e-08
P48556	1	1	1		7	7	8				P48556	3.60009	1.92961e-13	1.37707e-12		0.548108	0.0270024	0.0385127		-2.59942	2.9051e-11	1.03692e-10
P48637	1	1	1		7	8	11				P48637	2.97783	3.85486e-09	1.64882e-08		-1.84235	5.29421e-09	2.65614e-08		-4.78167	5.22128e-17	3.40831e-16
P48643	1	1	1		24	24	27				P48643	2.96365	2.53328e-23	4.78651e-22		-1.08076	3.39081e-10	2.08459e-09		-3.83206	3.52449e-45	2.07391e-43
P48723	1	0	1		3	0	4				P48723	8.13432	1.04015e-09	4.8686e-09		1.44751	0.000862854	0.00166546		-6.08304	6.44077e-08	1.53973e-07
P48729	1	1	1		7	6	7				P48729	1.62876	1.38909e-08	5.50691e-08		-1.27374	0.00712205	0.0113178		-2.81335	4.71993e-12	1.84628e-11
P48730	0	1	1		0	2	3				P48730	1.47077	0.417205	0.468247		-1.76293	0.000128339	0.000299167		-3.61026	0.000107375	0.000162065
P48735	1	1	1		12	9	16				P48735	6.4589	2.64293e-15	2.40846e-14		2.2889	8.18451e-15	9.33851e-14		-5.25357	3.51371e-23	3.89058e-22
P48739	1	1	1		7	5	7				P48739	2.8499	8.13484e-10	3.90529e-09		1.53117	3.11659e-07	1.19527e-06		-1.42598	1.39414e-06	2.74497e-06
P48960	1	1	1		6	10	10				P48960	-0.642637	0.0695365	0.088923		-3.98202	2.46691e-14	2.66698e-13		-3.18698	1.86314e-14	9.56893e-14
P49005	0	0	1		0	0	2				P49005	4.59624	0.0001366	0.000277034		-1.42974	0.0440635	0.0599794		-6.02598	7.90299e-08	1.85695e-07
P49006	1	1	1		2	2	2				P49006	0.323032	0.533836	0.588247		-2.8916	8.65234e-06	2.54746e-05		-3.21463	7.10017e-06	1.27654e-05
P49023	1	0	1		3	0	3				P49023	8.47318	0.000215354	0.000422402		-0.159932	0.553979	0.614389		-8.63311	0.00019022	0.000275885
P49137	1	0	1		2	0	2				P49137	5.51834	1.23955e-05	3.06466e-05		0.838667	0.0139967	0.0210949		-4.67967	4.60611e-05	7.32249e-05
P49184	0	1	1		0	4	5				P49184	0.564348	0.612128	0.664564		-3.98716	9.20247e-05	0.000221667		-3.93604	1.64376e-09	4.78153e-09
P49189	1	1	1		11	10	11				P49189	3.33162	1.03118e-17	1.1605e-16		2.09781	4.20966e-13	3.87044e-12		-3.44368	9.30808e-20	7.90515e-19
P49207	1	1	1		4	4	4				P49207	1.2735	0.000337557	0.000640146		-2.36299	8.66725e-08	3.6134e-07		-3.65275	5.17021e-09	1.41034e-08
P49257	1	1	1		8	8	9				P49257	3.31471	2.97346e-16	2.94416e-15		1.87697	4.92353e-10	2.94768e-09		-2.76828	5.7434e-12	2.21924e-11
P49321	1	1	1		3	5	6				P49321	1.51039	0.00437035	0.00687342		-1.41529	0.000135337	0.000313881		-2.85429	1.67686e-12	6.83184e-12
P49327	1	1	1		61	53	76				P49327	1.70798	2.56511e-35	1.06724e-33		-3.19771	2.05818e-96	1.0597e-93		-4.95798	3.76428e-150	3.87627e-147
P49354	1	0	1		4	0	4				P49354	4.1888	7.26529e-10	3.52482e-09		1.138	0.00113678	0.00213516		-3.67579	6.92103e-08	1.6431e-07
P49368	1	1	1		23	23	26				P49368	2.65964	2.89517e-36	1.28228e-34		-0.6967	8.49487e-08	3.54872e-07		-3.26625	8.68729e-42	4.16081e-40
P49411	1	1	1		14	12	16				P49411	2.33433	1.71071e-15	1.57991e-14		-1.52354	1.10317e-12	9.56625e-12		-3.84664	2.04462e-27	3.2022e-26
P49418	1	0	0		2	0	0				P49418	8.98413	5.08087e-06	1.34673e-05		3.44006	4.23781e-05	0.000109852		-5.54407	0.00141353	0.00180874
P49419	1	1	1		15	12	18				P49419	3.60996	1.17686e-11	6.94479e-11		-0.647498	0.606867	0.667116		-4.2041	2.29658e-28	4.00831e-27
P49458	0	1	0		0	2	0				P49458	-1.84401	0.000519465	0.000958201		0.136092	0.00296035	0.00512987		1.98011	0.473706	0.491733
P49585	1	1	1		5	4	6				P49585	2.9676	0.000255959	0.000495906		-1.37453	1.08776e-06	3.80992e-06		-3.63005	1.229e-06	2.442e-06
P49588	1	1	1		24	18	25				P49588	3.11431	2.48475e-28	6.68933e-27		-0.760449	0.93644	0.97404		-3.22727	1.10793e-35	3.48365e-34
P49589	1	1	1		2	6	9				P49589	2.30109	0.150333	0.181643		-1.94343	0.027156	0.0386979		-3.2541	2.08498e-10	6.73043e-10
P49591	1	1	1		14	9	12				P49591	5.22301	2.04901e-22	3.48756e-21		1.20382	3.46589e-12	2.83817e-11		-3.41803	1.29298e-17	8.89111e-17
P49642	0	1	1		0	6	6				P49642	0.351994	0.621328	0.673324		-3.38131	5.25282e-06	1.61586e-05		-3.61713	5.47783e-10	1.69393e-09
P49643	0	1	1		0	3	3				P49643	1.20317	0.646787	0.698327		-4.79921	0.00166923	0.00303422		-6.00238	1.79694e-07	3.98793e-07
P49720	1	1	1		5	3	5				P49720	4.65782	4.20308e-11	2.35224e-10		0.215836	0.509252	0.569848		-3.94265	4.69619e-11	1.64207e-10
P49721	1	1	1		4	3	4				P49721	4.20859	1.55115e-10	8.07734e-10		0.221191	0.293164	0.344815		-4.20981	1.57491e-10	5.17721e-10
P49736	1	1	1		14	15	24				P49736	1.20795	2.62296e-06	7.24126e-06		-3.55572	1.0639e-33	6.1721e-32		-4.42993	4.87958e-39	1.99e-37
P49748	1	1	1		10	8	17				P49748	2.87935	6.83141e-09	2.80544e-08		-3.86942	8.38535e-17	1.23489e-15		-5.3647	1.6661e-38	6.47421e-37
P49755	1	1	1		4	3	4				P49755	3.45115	2.42993e-08	9.30421e-08		1.5797	1.33677e-06	4.61152e-06		-2.12161	3.9521e-06	7.34599e-06
P49756	1	1	1		3	3	8				P49756	1.57735	0.0332176	0.0448748		-3.01375	3.65872e-08	1.61352e-07		-3.90575	3.03854e-13	1.36189e-12
P49757	1	0	1		2	0	3				P49757	3.13099	0.000151364	0.000304875		-1.66984	0.0321415	0.0450003		-6.29048	1.71466e-08	4.40592e-08
P49768	0	1	1		0	2	4				P49768	1.28662	0.000496591	0.000918895		-1.03378	8.5487e-05	0.00020713		-2.59681	6.88048e-08	1.63441e-07
P49770	1	1	1		4	4	4				P49770	2.34387	1.70772e-07	5.78461e-07		0.217681	0.370021	0.426804		-1.9426	2.26945e-06	4.32772e-06
P49773	1	0	1		3	0	3				P49773	7.34262	3.11971e-07	1.00785e-06		3.64175	6.83555e-08	2.89965e-07		-4.58503	2.89789e-05	4.77075e-05
P49790	0	0	1		0	0	3				P49790	4.62957	3.46873e-05	7.8894e-05		-1.21263	0.000118406	0.000278341		-5.84219	3.54449e-07	7.59613e-07
P49792	1	0	1		3	0	11				P49792	3.19444	8.28911e-16	7.86618e-15		-1.0001	0.0488938	0.0660306		-6.01087	1.2833e-20	1.18784e-19
P49795	0	0	1		0	0	2				P49795	2.03175	0.717158	0.764486		-1.93832	0.000209264	0.000463169		-3.97007	0.0441124	0.0489227
P49821	1	0	1		3	0	3				P49821	3.57214	1.76866e-05	4.26031e-05		1.34646	0.00246443	0.00432878		-3.29514	2.40836e-07	5.28787e-07
P49840	1	1	1		3	3	4				P49840	4.29811	1.23409e-08	4.92084e-08		0.765725	0.016427	0.0244801		-3.53351	2.39526e-09	6.81829e-09
P49841	1	1	1		7	5	7				P49841	4.72948	7.76656e-15	6.73483e-14		0.563816	0.00643189	0.0103206		-3.76725	4.92789e-15	2.7064e-14
P49848	0	0	1		0	0	3				P49848	1.95836	0.00739281	0.0111911		-1.56283	9.58912e-05	0.000229771		-3.88879	9.94988e-06	1.74324e-05
P49902	1	1	1		4	4	4				P49902	3.3719	5.11311e-08	1.87542e-07		-0.0507002	0.997566	1		-3.16376	1.06882e-07	2.4499e-07
P49915	1	1	1		18	10	21				P49915	3.24446	6.58772e-33	2.42275e-31		-0.417053	0.00366425	0.00620348		-4.05365	6.91962e-36	2.24424e-34
P49959	1	1	1		6	7	9				P49959	1.69641	0.000333687	0.000633098		-1.74845	9.57768e-07	3.39213e-06		-3.45718	1.50722e-16	9.50723e-16
P50148	1	1	1		6	6	6				P50148	3.50107	1.16923e-12	7.65667e-12		0.570576	0.00399424	0.00672345		-2.70767	7.48317e-11	2.56432e-10
P50213	1	1	1		8	6	8				P50213	6.71434	3.38062e-11	1.90229e-10		3.33864	2.55866e-15	3.08162e-14		-3.91112	1.03006e-12	4.30304e-12
P50281	1	1	1		5	8	9				P50281	-0.458001	0.0796003	0.100544		-3.73426	1.54404e-12	1.30594e-11		-3.259	9.53559e-15	5.05497e-14
P50395	1	1	1		17	15	19				P50395	2.99516	5.05187e-25	1.07817e-23		0.0528936	0.999841	1		-3.11733	3.31621e-25	4.39211e-24
P50402	0	0	1		0	0	3				P50402	0.354229	0.274341	0.318359		-2.51799	0.00475476	0.00789076		-4.31089	0.000553269	0.000747186
P50452	0	0	1		0	0	2				P50452	3.88417	0.0312148	0.0423497		-2.17104	0.50137	0.561944		-6.05521	2.72317e-05	4.50463e-05
P50454	1	1	1		15	18	17				P50454	-0.767701	0.0960594	0.119537		-0.0785504	0.996398	1		0.346631	0.313826	0.328752
P50502	1	1	1		7	6	7				P50502	3.51342	2.83427e-14	2.28015e-13		1.15998	2.01673e-06	6.75907e-06		-2.27509	1.58152e-12	6.4498e-12
P50552	1	1	1		9	5	12				P50552	2.06176	0.000233354	0.000455106		-3.15594	3.2759e-13	3.05281e-12		-5.42682	1.28238e-18	9.76363e-18
P50570	1	1	1		17	14	19				P50570	4.27556	1.68563e-37	7.98057e-36		-0.125016	0.971956	1		-4.18898	5.70711e-40	2.3745e-38
P50579	1	1	1		3	6	6				P50579	1.12174	0.0115596	0.0169084		-1.59983	3.96932e-05	0.000103515		-2.62225	3.07619e-11	1.08856e-10
P50613	1	0	1		2	0	3				P50613	4.58686	0.00144537	0.0024693		-0.901852	0.00684216	0.0109025		-5.8001	0.000504318	0.000684894
P50748	0	0	1		0	0	22				P50748	2.94746	3.36484e-07	1.08195e-06		-2.85887	1.39138e-14	1.55736e-13		-5.78939	9.25686e-27	1.38149e-25
P50750	1	0	1		4	0	4				P50750	5.9511	1.01038e-07	3.52989e-07		0.471768	0.203448	0.246761		-6.18467	3.2956e-10	1.0394e-09
P50851	1	0	1		17	0	14				P50851	7.68804	5.23663e-31	1.75363e-29		3.21024	9.14255e-27	2.83144e-25		-3.39345	9.01434e-16	5.32713e-15
P50895	1	1	1		6	7	8				P50895	0.109754	0.999999	1		-1.54158	6.01257e-09	2.99828e-08		-1.79118	1.41194e-09	4.14228e-09
P50897	0	1	1		0	4	4				P50897	-0.379559	0.998894	1		-3.01856	0.00143735	0.00265134		-2.99073	4.78627e-08	1.16448e-07
P50914	1	1	1		4	3	4				P50914	1.01647	0.00272479	0.00444316		-2.97361	3.6977e-08	1.62897e-07		-4.73275	1.24927e-09	3.69667e-09
P50990	1	1	1		33	28	34				P50990	3.46588	2.43927e-53	4.01894e-51		-0.288664	0.0557742	0.074686		-3.70867	6.63396e-59	7.59035e-57
P50991	1	1	1		17	18	18				P50991	2.66751	5.59362e-27	1.36332e-25		-0.449833	0.00257897	0.00452034		-3.27015	9.87221e-32	2.20998e-30
P50995	1	1	1		13	15	18				P50995	-1.65527	2.90686e-08	1.10659e-07		-4.22053	3.04183e-30	1.31888e-28		-2.6602	1.7427e-21	1.72138e-20
P51003	1	0	1		6	0	6				P51003	2.99119	0.000931067	0.00165162		0.602337	0.180231	0.220616		-3.21002	0.000270917	0.000383078
P51114	1	1	1		6	8	9				P51114	1.25567	0.000938866	0.00166474		-2.39097	3.81386e-13	3.53018e-12		-2.82183	5.86397e-12	2.26158e-11
P51116	1	1	1		3	2	4				P51116	2.24617	6.67996e-05	0.000142564		-1.72874	5.25072e-06	1.61586e-05		-4.34291	2.22891e-08	5.65674e-08
P51148	1	1	1		5	6	6				P51148	1.66558	1.48115e-07	5.05874e-07		-0.444612	0.0697242	0.0917553		-2.39176	4.94788e-09	1.35238e-08
P51149	1	1	1		14	13	14				P51149	2.60346	1.6753e-21	2.63381e-20		-0.236416	0.590965	0.650677		-2.78706	2.34601e-24	2.89336e-23
P51151	1	0	1		4	0	4				P51151	7.72121	8.07102e-07	2.43728e-06		1.47601	0.000454605	0.000939076		-5.44102	2.07766e-05	3.4973e-05
P51153	1	1	1		3	3	3				P51153	1.32188	0.00102549	0.00180513		-1.54513	3.20077e-05	8.46212e-05		-2.86701	2.0205e-07	4.46962e-07
P51159	1	1	1		5	4	5				P51159	6.26775	4.60321e-15	4.08634e-14		4.22384	5.75149e-12	4.52971e-11		-2.42379	2.99701e-08	7.51807e-08
P51452	1	1	1		3	3	3				P51452	2.85884	9.29855e-07	2.7916e-06		1.3621	2.18755e-05	6.01101e-05		-1.49674	0.000221362	0.000317697
P51531	0	0	1		0	0	4				P51531	0.680779	0.662205	0.713104		-2.99519	0.0367933	0.0508222		-2.44803	2.5376e-05	4.22659e-05
P51532	1	1	1		3	4	6				P51532	-0.386138	0.742962	0.78832		-2.56289	3.7639e-07	1.42496e-06		-2.89491	4.40312e-08	1.07571e-07
P51553	1	0	1		5	0	3				P51553	5.43729	2.60914e-12	1.64832e-11		1.70133	2.93395e-05	7.81186e-05		-2.92405	1.8339e-06	3.54307e-06
P51570	1	1	1		5	5	6				P51570	1.7221	0.000654873	0.00118829		-0.738349	0.478386	0.537646		-2.55525	3.4573e-09	9.62853e-09
P51571	0	1	1		0	2	2				P51571	0.634871	0.11193	0.137953		-1.4052	0.0127119	0.0193283		-2.04007	0.000196632	0.000284284
P51572	1	1	1		3	3	5				P51572	0.313986	0.601159	0.653516		-3.47825	1.40374e-11	1.04557e-10		-3.79224	2.48556e-07	5.44865e-07
P51608	0	0	1		0	0	6				P51608	0.580735	0.905017	0.93686		-4.05649	7.50945e-05	0.000184116		-4.1076	9.98097e-12	3.7648e-11
P51610	1	1	1		14	10	14				P51610	3.51074	5.41256e-21	8.16643e-20		0.392932	0.0960329	0.123189		-3.15024	1.8682e-18	1.38901e-17
P51649	1	0	0		2	0	0				P51649	11.7314	1.272e-10	6.70856e-10		6.70256	6.24701e-08	2.67201e-07		-5.02885	6.63312e-06	1.19647e-05
P51659	1	1	1		7	5	11				P51659	4.38649	1.02256e-08	4.11722e-08		0.825541	0.590122	0.649923		-2.84543	1.71207e-13	7.90584e-13
P51665	1	1	1		10	6	10				P51665	3.39361	7.78899e-13	5.16632e-12		0.32292	0.273892	0.324184		-3.30956	1.95003e-10	6.33453e-10
P51809	1	1	1		5	5	5				P51809	2.78739	1.45642e-09	6.69532e-09		-0.0324936	0.992433	1		-2.88808	5.09616e-10	1.58304e-09
P51812	1	1	1		8	5	8				P51812	3.94521	1.29911e-10	6.84278e-10		1.23861	9.87108e-07	3.49004e-06		-2.89677	6.31549e-08	1.51417e-07
P51858	1	1	1		4	5	5				P51858	0.873973	0.0173509	0.0246103		-0.769615	0.00422892	0.00708374		-1.64359	2.57342e-05	4.27648e-05
P51888	1	0	0		2	0	0				P51888	9.09821	1.13473e-06	3.34091e-06		7.23982	1.36577e-08	6.43663e-08		-1.85838	0.0775742	0.0844865
P51911	1	0	0		11	0	0				P51911	5.88817	1.31146e-19	1.75386e-18		3.87793	1.53225e-13	1.48502e-12		-2.69275	6.90059e-06	1.2412e-05
P51991	1	1	1		15	10	15				P51991	3.35759	2.87543e-23	5.33509e-22		-0.928171	2.91463e-08	1.31638e-07		-5.01759	3.95826e-31	8.4917e-30
P52209	1	1	1		14	14	18				P52209	3.71274	4.35179e-20	5.99499e-19		1.70854	1.14562e-12	9.85134e-12		-3.14386	1.43608e-23	1.65229e-22
P52272	1	1	1		25	26	26				P52272	1.67197	7.04903e-18	8.11032e-17		-1.22594	4.86426e-16	6.42158e-15		-2.92128	1.41933e-35	4.33052e-34
P52292	1	1	1		7	9	9				P52292	-1.31786	0.000377804	0.000709611		-3.58923	3.80645e-17	5.89427e-16		-2.87483	6.87843e-18	4.87646e-17
P52294	1	0	1		4	0	4				P52294	0.705203	0.00568337	0.008771		-1.28465	0.000412699	0.000860776		-3.29685	1.313e-09	3.87134e-09
P52298	1	0	1		2	0	3				P52298	3.48924	0.00328907	0.00528587		-2.9973	8.24766e-05	0.000200189		-9.21189	2.45813e-09	6.98279e-09
P52306	1	0	1		6	0	6				P52306	4.74403	2.9441e-15	2.66522e-14		2.75316	2.42493e-10	1.53195e-09		-2.89804	9.97482e-06	1.74674e-05
P52434	1	1	1		4	4	4				P52434	0.750685	0.378053	0.427803		-1.64122	0.000173234	0.000390773		-2.41371	8.41936e-06	1.49544e-05
P52565	1	1	1		5	6	6				P52565	0.89472	0.0213424	0.0297091		-1.18583	6.751e-05	0.000166811		-2.28691	1.37678e-09	4.0478e-09
P52566	0	1	1		0	2	2				P52566	-2.14203	0.158186	0.190461		-5.61684	0.000190223	0.000424908		-3.47481	0.00326093	0.00401068
P52594	1	0	0		3	0	0				P52594	3.41305	0.0014288	0.00244292		1.34563	0.0958574	0.123002		-2.06742	0.0154282	0.0177065
P52597	1	1	1		4	4	5				P52597	0.91049	0.00134781	0.00231705		-2.0928	9.67738e-10	5.57498e-09		-3.62153	2.60926e-11	9.37831e-11
P52630	0	0	1		0	0	5				P52630	2.2213	0.0576836	0.0749736		-4.39676	3.69992e-05	9.70698e-05		-7.68142	2.45168e-10	7.82222e-10
P52701	1	1	1		7	7	10				P52701	1.67372	7.47591e-05	0.000158157		-1.57804	7.48613e-10	4.38002e-09		-3.56852	2.32292e-14	1.16684e-13
P52732	0	1	1		0	4	9				P52732	3.03805	6.39992e-05	0.000137084		-3.26899	2.62423e-10	1.64775e-09		-7.73968	1.98283e-17	1.33452e-16
P52788	1	1	1		7	7	10				P52788	2.60219	1.99131e-05	4.75215e-05		-0.959492	0.00994481	0.0154053		-3.69577	1.33686e-13	6.25031e-13
P52888	1	1	1		7	3	9				P52888	7.7123	1.90155e-13	1.36031e-12		3.63429	9.55156e-08	3.93823e-07		-6.49558	3.10799e-13	1.3915e-12
P52907	1	1	1		7	8	8				P52907	1.4829	2.3933e-06	6.6653e-06		-1.07065	1.55924e-07	6.26588e-07		-2.75564	2.31554e-13	1.05389e-12
P52943	1	1	1		3	3	3				P52943	1.57915	3.66143e-05	8.29106e-05		-4.09581	2.99822e-10	1.85989e-09		-6.4998	2.78745e-07	6.07167e-07
P52948	0	0	1		0	0	6				P52948	1.56158	0.0355428	0.0477809		-3.16044	1.31451e-09	7.43743e-09		-4.17899	1.33649e-08	3.49746e-08
P53004	1	1	1		6	7	7				P53004	3.45889	8.88033e-06	2.25234e-05		-1.02768	2.67918e-05	7.19396e-05		-4.36633	3.48287e-16	2.14439e-15
P53041	1	1	1		9	7	9				P53041	4.41521	1.07329e-14	9.15294e-14		1.8861	4.42536e-11	3.10001e-10		-2.44981	3.78394e-09	1.04534e-08
P53350	0	1	1		0	3	4				P53350	1.59503	9.41089e-05	0.000196072		-3.65471	3.33491e-08	1.48986e-07		-4.9225	2.09375e-10	6.74817e-10
P53365	1	0	1		3	0	3				P53365	4.37781	6.09784e-08	2.2149e-07		2.00802	0.000115223	0.000271823		-2.36979	0.000845331	0.001116
P53367	1	1	1		4	4	4				P53367	3.88355	9.76942e-11	5.21923e-10		1.77724	9.40962e-08	3.88749e-07		-2.54289	3.20187e-08	7.98819e-08
P53396	1	1	1		33	30	34				P53396	3.26375	7.62067e-52	1.12106e-49		-0.63563	5.68494e-12	4.48588e-11		-3.88256	2.41847e-59	2.92991e-57
P53597	1	0	1		3	0	2				P53597	12.0348	2.88179e-12	1.81778e-11		4.47746	1.22145e-07	4.94218e-07		-8.09035	7.03393e-10	2.15251e-09
P53609	1	0	1		2	0	2				P53609	9.33719	4.63195e-07	1.46311e-06		2.94745	0.000819287	0.00159633		-6.38974	4.76236e-06	8.77288e-06
P53618	1	1	1		25	20	27				P53618	4.56653	7.96653e-47	8.41388e-45		0.695034	2.38432e-09	1.27878e-08		-3.9138	6.28347e-45	3.6453e-43
P53621	1	1	1		34	23	34				P53621	4.21128	6.57077e-55	1.28881e-52		-0.0669671	1	1		-4.12878	9.22854e-57	9.27131e-55
P53680	1	1	1		4	4	4				P53680	3.51327	2.96217e-09	1.29387e-08		0.422046	0.04339	0.059133		-3.09122	2.21071e-08	5.61401e-08
P53794	0	1	1		0	2	2				P53794	-1.57708	0.942154	0.968958		-4.15527	0.00345079	0.00588563		-2.57819	3.22805e-05	5.27214e-05
P53801	1	0	1		2	0	2				P53801	3.50712	3.026e-05	6.98267e-05		-1.70083	0.00066983	0.00133094		-5.20794	6.63723e-07	1.37105e-06
P53985	1	1	1		4	3	5				P53985	1.66738	0.001721	0.00291121		-1.51272	0.0341807	0.0475965		-3.21894	3.18922e-06	5.99014e-06
P53990	1	1	1		6	6	6				P53990	0.197255	0.782931	0.824359		-2.00853	1.72963e-09	9.55005e-09		-2.03816	2.9375e-09	8.23659e-09
P53992	1	1	1		9	6	13				P53992	5.86274	9.91771e-10	4.67403e-09		0.244709	0.868727	0.913994		-4.8949	1.04153e-19	8.79108e-19
P53999	1	1	1		7	8	9				P53999	-1.63882	1.03286e-09	4.84e-09		-2.68155	2.19744e-17	3.52189e-16		-1.65256	4.32216e-08	1.05844e-07
P54105	1	0	1		2	0	2				P54105	3.02849	6.774e-05	0.000144421		-0.0248057	0.968332	0.998138		-3.0533	3.57691e-05	5.78457e-05
P54136	1	1	1		13	19	21				P54136	1.29043	1.10456e-06	3.2708e-06		-2.55298	1.36495e-09	7.6597e-09		-3.3379	1.20862e-30	2.47677e-29
P54289	1	0	0		11	0	0				P54289	9.19062	1.73534e-18	2.12103e-17		4.73455	9.36471e-11	6.29253e-10		-2.92677	5.20269e-06	9.50749e-06
P54577	1	1	1		12	12	12				P54577	2.78514	3.55861e-18	4.21204e-17		-0.371463	0.51259	0.57265		-2.97127	1.83738e-20	1.667e-19
P54578	1	1	1		11	10	12				P54578	2.85624	2.26642e-15	2.07453e-14		0.609553	0.00205311	0.00365304		-1.99049	6.39354e-13	2.72619e-12
P54619	1	1	1		4	3	4				P54619	2.78086	4.7799e-07	1.50262e-06		0.00937445	0.999893	1		-2.08599	8.02225e-08	1.88176e-07
P54652	1	1	1		11	6	12				P54652	5.77973	2.38446e-27	5.98877e-26		3.32568	1.40533e-24	3.99211e-23		-2.84982	5.74967e-13	2.47212e-12
P54709	1	1	1		7	8	10				P54709	-1.10483	0.000135698	0.000275475		-3.33394	5.13157e-13	4.644e-12		-2.26138	1.72858e-11	6.38568e-11
P54727	1	1	1		7	5	7				P54727	2.54694	1.00248e-06	2.98786e-06		-0.470888	0.0145455	0.0218103		-3.40062	8.42594e-10	2.55007e-09
P54760	0	1	1		0	6	7				P54760	0.383717	0.539532	0.59373		-3.6086	2.28213e-08	1.04678e-07		-3.34317	1.80907e-11	6.65911e-11
P54803	1	1	1		3	3	4				P54803	2.99372	5.12086e-06	1.35645e-05		0.221159	0.549409	0.609649		-4.29765	2.21493e-06	4.23747e-06
P54819	0	1	1		0	4	4				P54819	1.41225	0.00885756	0.0132333		-1.40638	0.000794554	0.00155255		-2.95551	8.24554e-07	1.68135e-06
P54886	1	1	1		23	7	22				P54886	6.84101	1.80626e-39	9.92e-38		2.01054	9.71839e-30	4.04344e-28		-4.74848	3.64913e-29	6.71017e-28
P54920	1	1	1		10	11	12				P54920	1.86917	1.24287e-06	3.63592e-06		-1.6325	4.20455e-06	1.32506e-05		-3.43315	8.88195e-18	6.25381e-17
P55010	1	1	1		6	6	6				P55010	3.91516	3.55383e-13	2.44378e-12		-0.482454	0.0584464	0.0780865		-4.12645	1.00698e-10	3.38591e-10
P55011	1	1	1		3	3	3				P55011	2.29485	1.13167e-05	2.82678e-05		-0.840233	0.0137041	0.0207069		-3.13508	2.41322e-07	5.2957e-07
P55036	1	1	1		4	5	5				P55036	2.93751	5.64381e-08	2.06089e-07		1.03896	0.000127457	0.000297279		-1.62302	1.27061e-05	2.19808e-05
P55039	1	0	1		5	0	6				P55039	4.82343	2.02006e-10	1.04132e-09		0.771428	0.000368114	0.00077535		-5.45687	2.97864e-11	1.0595e-10
P55060	1	1	1		28	21	29				P55060	2.77362	1.37893e-33	5.25909e-32		-1.49545	2.41771e-27	7.92844e-26		-4.37266	5.76172e-51	4.47784e-49
P55072	1	1	1		37	34	37				P55072	3.24436	5.34066e-54	9.99918e-52		0.306628	0.0357519	0.0495999		-2.75272	1.04784e-49	7.57201e-48
P55081	0	1	1		0	2	3				P55081	-0.317994	0.735057	0.781544		-2.6461	0.000768774	0.00150933		-2.3281	5.56619e-05	8.76036e-05
P55084	1	1	1		8	4	10				P55084	6.44121	1.37029e-19	1.82072e-18		2.22004	2.6866e-14	2.8818e-13		-4.53064	1.45049e-17	9.8917e-17
P55196	1	1	1		4	5	5				P55196	2.59744	9.52796e-09	3.86657e-08		-0.2921	0.325496	0.379592		-3.22127	1.90771e-10	6.21175e-10
P55209	1	1	1		7	5	7				P55209	2.41789	1.82396e-10	9.43829e-10		-1.62267	2.405e-10	1.52169e-09		-3.89471	4.14839e-16	2.52396e-15
P55210	0	0	1		0	0	3				P55210	3.12753	0.0345688	0.0465932		-2.32574	0.00110312	0.00208142		-4.21415	3.1338e-06	5.89412e-06
P55263	1	1	1		4	2	4				P55263	2.02989	3.02579e-06	8.29775e-06		-1.15286	0.453266	0.512209		-3.38754	1.37253e-10	4.54459e-10
P55265	1	1	1		10	6	12				P55265	3.93708	2.8251e-17	3.11973e-16		-0.836411	6.6083e-07	2.39609e-06		-4.98112	1.56402e-22	1.67765e-21
P55268	1	1	1		18	41	38				P55268	-3.15935	2.38414e-44	2.04589e-42		-1.59071	2.91498e-22	7.02153e-21		1.31511	2.11124e-20	1.90289e-19
P55290	1	1	1		5	10	11				P55290	-0.787048	0.000720244	0.00130004		-4.41829	8.36852e-21	1.82381e-19		-3.16377	2.21099e-18	1.64091e-17
P55735	0	1	1		0	3	3				P55735	0.855759	0.0766655	0.0973444		-1.4116	0.0106476	0.0164199		-2.26736	0.000394336	0.000545607
P55786	1	1	1		36	29	40				P55786	5.90317	4.07139e-70	1.52455e-67		1.02243	2.58701e-20	5.30144e-19		-4.7656	8.10831e-66	1.39159e-63
P55809	1	1	1		7	8	11				P55809	4.87109	3.93558e-19	5.00329e-18		2.93443	3.03827e-14	3.20068e-13		-4.05305	1.06181e-17	7.36295e-17
P55884	1	1	1		19	21	24				P55884	0.84174	4.51605e-05	0.000100116		-0.630237	2.56913e-05	6.92102e-05		-1.46857	2.1237e-16	1.32941e-15
P56182	0	0	1		0	0	2				P56182	-1.34511	0.704083	0.751911		-4.2308	0.00339707	0.00580121		-2.88569	0.00161298	0.00205121
P56192	1	1	1		10	12	16				P56192	2.2646	5.31236e-10	2.61429e-09		-2.11518	1.30385e-08	6.20156e-08		-3.91258	1.61556e-30	3.28364e-29
P56199	1	1	1		6	10	10				P56199	0.84897	0.118951	0.145995		-1.65522	5.9102e-07	2.15625e-06		-2.96544	3.30216e-15	1.85814e-14
P56537	1	1	1		3	3	3				P56537	1.78339	2.95076e-05	6.82436e-05		-1.29676	2.56371e-05	6.91095e-05		-2.81375	8.96999e-07	1.81203e-06
P56545	1	1	1		7	5	7				P56545	6.74614	6.62234e-15	5.76689e-14		0.796602	0.000366646	0.000773676		-4.06948	6.65642e-12	2.55069e-11
P57076	1	0	1		2	0	2				P57076	6.03715	0.000292508	0.000562484		1.27063	0.147257	0.182806		-4.76652	0.00444869	0.00539899
P57081	0	0	1		0	0	2				P57081	3.64426	0.0162342	0.0231539		-4.19097	0.00262863	0.00460541		-7.83523	8.19353e-07	1.67158e-06
P57678	0	1	1		0	4	5				P57678	-1.70937	0.232658	0.273151		-5.12841	3.55101e-06	1.13826e-05		-3.55015	1.26903e-10	4.23593e-10
P57737	1	0	1		2	0	3				P57737	7.18684	4.01685e-08	1.49192e-07		2.31337	0.00623254	0.0100297		-3.65521	9.54775e-07	1.92324e-06
P57740	0	0	1		0	0	5				P57740	5.63223	1.22419e-05	3.03395e-05		-1.05352	0.0278712	0.0395594		-7.11615	9.50619e-06	1.67262e-05
P57772	1	0	1		2	0	4				P57772	5.95246	0.000508833	0.000939858		-1.10008	0.33678	0.391914		-5.47142	2.34668e-07	5.16068e-07
P58107	0	1	1		0	3	5				P58107	2.11352	0.00980021	0.0145153		-2.741	0.000529774	0.00107495		-4.88079	6.3536e-06	1.14934e-05
P58397	0	1	1		0	7	8				P58397	-0.500919	0.297824	0.343334		-3.01258	3.08181e-10	1.90315e-09		-2.16929	9.47011e-12	3.58195e-11
P58546	1	0	1		2	0	2				P58546	0.84898	0.00319016	0.00514562		-1.2329	0.00131091	0.00243777		-2.08188	4.02579e-05	6.4648e-05
P59768	1	0	0		2	0	0				P59768	8.31032	9.87591e-08	3.45917e-07		6.33765	0.000117034	0.000275465		-1.97267	0.045133	0.0499739
P59998	1	1	1		6	6	6				P59998	3.10283	8.7567e-12	5.25785e-11		1.18998	1.74601e-05	4.88575e-05		-1.97102	3.07373e-08	7.68712e-08
P60174	1	1	1		13	12	13				P60174	3.16653	1.18669e-20	1.73332e-19		-0.861114	9.84313e-06	2.87545e-05		-4.25003	2.60732e-28	4.51242e-27
P60228	1	1	1		18	18	18				P60228	1.56134	1.53904e-13	1.12799e-12		-0.0619841	0.997905	1		-1.90152	1.3605e-16	8.60814e-16
P60468	1	1	1		3	3	3				P60468	2.81606	7.92106e-06	2.03156e-05		0.432011	0.0766092	0.0999535		-3.56298	1.53383e-06	2.99992e-06
P60510	1	0	0		2	0	0				P60510	5.69956	3.30385e-05	7.54355e-05		-1.81341	0.649183	0.708904		-7.51298	9.09315e-07	1.83601e-06
P60520	0	0	1		0	0	2				P60520	4.75745	1.81602e-05	4.36671e-05		-2.87307	0.000241202	0.000526783		-7.63052	1.60755e-09	4.68282e-09
P60660	1	1	1		7	7	7				P60660	1.13197	0.000202813	0.00040009		-1.71071	3.97055e-10	2.40157e-09		-2.93908	9.01263e-12	3.41832e-11
P60709;P63261	1	1	1		10	13	10				P60709;P63261	3.5956	2.5552e-23	4.80588e-22		-0.361354	0.0563221	0.0753706		-4.15804	7.70357e-27	1.15807e-25
P60842	1	1	1		23	19	23				P60842	4.09102	1.73279e-39	9.64509e-38		-0.160449	0.996755	1		-3.60756	7.26698e-39	2.87814e-37
P60866	1	1	1		4	3	4				P60866	3.24456	5.88235e-09	2.46735e-08		-1.22235	2.37448e-06	7.83694e-06		-4.55681	4.81644e-11	1.67984e-10
P60880	1	0	0		9	0	0				P60880	10.302	1.74114e-24	3.60389e-23		3.02128	1.39052e-09	7.782e-09		-5.05813	1.56441e-10	5.1468e-10
P60891	1	1	1		6	5	6				P60891	5.3049	4.12935e-12	2.56543e-11		1.43662	1.32558e-06	4.57676e-06		-3.79147	4.68274e-11	1.63876e-10
P60900	1	1	1		7	6	7				P60900	3.13029	3.93999e-12	2.45891e-11		-0.137161	0.978409	1		-3.50931	6.29422e-13	2.69781e-12
P60903	1	1	1		2	5	6				P60903	-1.28051	0.0393775	0.0525415		-5.38061	6.05221e-08	2.59678e-07		-3.90258	1.04463e-09	3.1316e-09
P60953	1	1	1		5	5	5				P60953	3.1893	1.00571e-08	4.0653e-08		0.084179	0.973123	1		-2.83202	9.23668e-08	2.14706e-07
P60981	1	1	1		3	2	3				P60981	5.03331	1.4803e-09	6.78992e-09		2.61389	2.36261e-06	7.81025e-06		-2.06109	1.08568e-05	1.89247e-05
P60983	1	0	1		4	0	4				P60983	4.43792	1.07998e-09	5.04928e-09		0.90977	0.0409217	0.0559802		-3.18339	1.36238e-06	2.69014e-06
P61006	1	1	1		6	6	6				P61006	3.25605	8.66757e-10	4.13214e-09		0.0364547	0.999999	1		-3.37049	2.20335e-08	5.59876e-08
P61009	1	0	1		3	0	3				P61009	3.64861	2.43847e-05	5.71984e-05		1.12458	0.000848963	0.00164399		-2.36638	0.000155551	0.0002285
P61011	1	1	1		16	6	15				P61011	5.56507	5.004e-29	1.44136e-27		1.07541	1.32595e-09	7.49192e-09		-4.36414	1.26415e-25	1.73567e-24
P61018	1	0	1		6	0	4				P61018	6.10691	1.28602e-12	8.4081e-12		2.74414	4.0735e-11	2.86816e-10		-3.12418	1.31219e-07	2.96974e-07
P61019	1	1	1		13	7	13				P61019	6.46395	1.15881e-25	2.66656e-24		2.88147	6.26656e-23	1.58355e-21		-3.12844	9.65887e-14	4.5941e-13
P61020	1	1	1		6	6	6				P61020	4.89571	2.38961e-13	1.68253e-12		2.02802	5.91586e-09	2.95363e-08		-3.09717	3.67573e-07	7.85287e-07
P61026	1	1	1		8	5	8				P61026	3.8812	4.68161e-15	4.1381e-14		0.985978	0.000782672	0.00153297		-2.63291	2.91175e-11	1.0384e-10
P61081	1	1	1		5	4	5				P61081	5.48758	1.61339e-14	1.33983e-13		1.93992	7.90237e-07	2.83535e-06		-3.77047	2.21077e-10	7.09202e-10
P61086	1	1	1		4	2	4				P61086	4.98311	2.0415e-08	7.90314e-08		0.913568	0.0193137	0.0283713		-4.06955	5.71532e-08	1.37508e-07
P61088	1	1	1		5	4	5				P61088	4.42997	1.39737e-11	8.14109e-11		1.08194	2.47649e-06	8.13347e-06		-3.3143	1.29128e-09	3.81549e-09
P61106	1	1	1		14	11	14				P61106	5.32333	3.3792e-28	9.03826e-27		2.36357	1.72016e-21	3.91454e-20		-2.88316	2.76038e-19	2.19498e-18
P61158	1	1	1		13	11	13				P61158	4.10251	1.53316e-25	3.43211e-24		1.18418	3.88628e-12	3.1511e-11		-3.06046	1.57748e-19	1.30475e-18
P61160	1	1	1		12	11	12				P61160	3.27766	1.08846e-18	1.34635e-17		1.17112	1.18363e-10	7.82564e-10		-2.06417	1.47442e-12	6.03692e-12
P61163	1	1	1		14	13	14				P61163	3.63329	1.95312e-22	3.35203e-21		0.855373	1.10709e-06	3.86451e-06		-2.81132	5.14864e-20	4.5026e-19
P61201	1	1	1		16	6	16				P61201	4.8976	3.93256e-25	8.48074e-24		1.70654	7.53781e-17	1.12494e-15		-3.30283	5.54491e-15	3.02109e-14
P61204;P84077	1	1	1		11	11	11				P61204;P84077	4.3028	2.84134e-23	5.2957e-22		1.58319	4.2216e-13	3.87278e-12		-2.68326	5.3206e-19	4.17439e-18
P61221	1	1	1		11	6	11				P61221	4.22661	2.66066e-21	4.12001e-20		-0.321918	0.0860737	0.111175		-4.34221	4.80108e-24	5.69903e-23
P61225	1	1	1		8	8	8				P61225	0.522153	0.209479	0.247801		-2.90117	1.68847e-15	2.06375e-14		-2.95733	1.09399e-14	5.71848e-14
P61247	1	1	1		16	17	19				P61247	1.20271	8.9103e-05	0.000186397		-2.96804	2.17896e-29	8.62995e-28		-3.88824	2.60833e-33	6.84313e-32
P61254	0	0	1		0	0	2				P61254	4.95617	4.39834e-07	1.39146e-06		-1.82983	0.000722204	0.00142469		-6.786	4.42701e-08	1.0809e-07
P61266	1	0	0		5	0	0				P61266	5.4495	1.20935e-07	4.18597e-07		4.25279	0.000609017	0.0012207		-0.69341	0.579068	0.596593
P61289	1	1	1		5	7	9				P61289	-0.447281	0.170937	0.204617		-2.83638	2.33364e-12	1.93017e-11		-2.22671	5.33022e-12	2.06929e-11
P61313	1	1	1		7	7	9				P61313	1.44435	0.000118357	0.000242549		-2.36489	1.64927e-13	1.59468e-12		-3.37693	5.96243e-17	3.87982e-16
P61326	1	1	1		5	6	5				P61326	0.403916	0.231368	0.271976		0.044317	0.997957	1		2.25357	0.304779	0.31968
P61353	1	1	1		7	8	8				P61353	0.0335388	1	1		-2.9714	1.43035e-16	2.06001e-15		-3.33173	4.53202e-15	2.50569e-14
P61421	1	1	1		7	6	7				P61421	5.07633	8.45472e-17	8.86132e-16		2.71616	6.46235e-13	5.73672e-12		-2.86572	1.80522e-09	5.22906e-09
P61457	1	1	1		3	2	3				P61457	6.14956	2.95819e-08	1.1251e-07		1.73292	0.000267566	0.000579405		-4.17408	7.6417e-09	2.04923e-08
P61586	1	1	1		5	5	5				P61586	4.47068	9.59956e-10	4.54489e-09		1.00186	0.00223611	0.00395472		-3.46882	1.69211e-08	4.35886e-08
P61599	1	0	1		2	0	2				P61599	2.51191	2.63323e-05	6.13824e-05		0.91681	0.0532631	0.0715327		-1.5951	0.00139402	0.00178544
P61604	1	1	1		6	6	6				P61604	-0.800692	0.0351926	0.047403		-2.94023	3.0301e-11	2.17438e-10		-2.20256	3.62656e-06	6.7653e-06
P61619	1	1	1		3	2	3				P61619	3.49316	5.7496e-06	1.50941e-05		0.743406	0.0281813	0.0399307		-3.62251	5.43591e-06	9.90405e-06
P61626	1	1	1		2	4	3				P61626	-3.36593	1.7168e-05	4.14994e-05		-0.555834	0.990037	1		2.92895	0.0273827	0.030842
P61758	1	1	1		3	4	4				P61758	1.75987	0.000209714	0.000412517		-0.63083	0.0374012	0.0514892		-2.54296	8.81867e-08	2.05569e-07
P61764	1	1	1		32	10	23				P61764	6.24285	4.28833e-55	8.83182e-53		3.607	1.15553e-52	1.76282e-50		-2.38556	3.09615e-21	2.99367e-20
P61769	1	1	1		3	2	3				P61769	0.919053	0.0383398	0.0512566		-2.91397	6.83047e-07	2.47447e-06		-3.729	4.33534e-08	1.06104e-07
P61812	1	1	1		4	4	4				P61812	1.65085	1.78738e-05	4.30287e-05		-0.8393	0.00352908	0.00600177		-2.03452	1.45927e-07	3.28098e-07
P61923	1	1	1		6	6	6				P61923	1.62188	0.00238086	0.00392428		-0.988035	0.0095038	0.0147721		-2.50338	8.05842e-07	1.64564e-06
P61962	1	0	1		2	0	2				P61962	3.20026	0.000414916	0.000775426		-0.194755	0.381106	0.437873		-3.39502	1.88604e-05	3.18125e-05
P61964	1	0	1		2	0	2				P61964	3.56661	1.58318e-05	3.86473e-05		-0.0566059	0.28676	0.338008		-3.62321	6.72271e-06	1.21185e-05
P61966	1	0	1		2	0	2				P61966	2.36062	0.000155976	0.000313368		0.0609994	0.611984	0.672382		-2.29962	0.000877108	0.00115499
P61970	1	0	1		2	0	2				P61970	6.67206	1.45125e-08	5.74227e-08		1.13026	0.00177326	0.00319932		-5.5418	2.755e-08	6.93634e-08
P61978	1	1	1		22	16	22				P61978	2.87845	3.74961e-27	9.2483e-26		-0.801365	6.21673e-06	1.88423e-05		-3.92527	8.04384e-34	2.16553e-32
P61981	1	1	1		9	6	9				P61981	3.83283	1.75119e-13	1.27216e-12		1.27164	3.31615e-06	1.0688e-05		-2.80146	1.83046e-10	5.97438e-10
P62070	1	1	1		5	6	6				P62070	0.371191	0.268852	0.312648		-2.90756	5.7387e-13	5.14983e-12		-3.18652	2.38701e-11	8.61708e-11
P62081	1	1	1		11	12	13				P62081	0.0183355	1	1		-1.8271	1.19278e-17	1.98108e-16		-1.75527	1.77164e-09	5.13901e-09
P62136	1	1	1		5	4	5				P62136	2.8841	6.17847e-07	1.89777e-06		-1.65517	9.21566e-08	3.81884e-07		-4.17767	1.90583e-07	4.22276e-07
P62140	1	1	1		4	3	4				P62140	4.02004	2.43053e-08	9.30421e-08		-0.0196509	0.995964	1		-3.81919	2.45027e-09	6.96527e-09
P62191	1	1	1		17	12	17				P62191	4.31613	4.40465e-30	1.35394e-28		1.28569	2.9517e-16	4.01257e-15		-3.37722	8.99548e-23	9.72503e-22
P62195	1	1	1		20	15	20				P62195	4.63128	5.97738e-40	3.46772e-38		1.21865	1.43017e-12	1.21211e-11		-3.5394	1.33417e-32	3.29069e-31
P62241	1	1	1		8	7	10				P62241	1.69771	4.36012e-11	2.43351e-10		-3.69907	3.12638e-22	7.48696e-21		-5.25179	2.39202e-25	3.2304e-24
P62244	1	1	1		7	7	7				P62244	0.683519	0.0533694	0.0698534		-1.5909	1.59916e-08	7.51076e-08		-2.22606	4.05507e-12	1.60296e-11
P62249	1	1	1		9	7	11				P62249	2.44099	1.97428e-14	1.6135e-13		-1.76726	9.25078e-13	8.07287e-12		-4.70742	3.71319e-22	3.89176e-21
P62258	1	1	1		16	15	16				P62258	3.0509	2.19294e-23	4.18182e-22		-0.354056	0.00922594	0.0143728		-3.29441	8.89749e-28	1.45432e-26
P62263	1	1	1		8	8	8				P62263	1.05543	1.72485e-06	4.93035e-06		-1.78266	3.24523e-13	3.03109e-12		-2.75421	3.86167e-14	1.90038e-13
P62266	1	1	1		4	3	4				P62266	1.77267	0.000304234	0.000582857		-2.72879	4.04085e-06	1.2823e-05		-4.36472	3.33579e-09	9.30273e-09
P62269	1	1	1		11	11	13				P62269	1.58083	1.42599e-10	7.48236e-10		-1.59799	5.04036e-14	5.15168e-13		-2.85849	3.99388e-22	4.16476e-21
P62277	1	1	1		11	9	11				P62277	-0.338318	0.532918	0.587393		-2.94011	2.47555e-16	3.39893e-15		-2.90101	7.48304e-15	4.03438e-14
P62280	1	1	1		9	8	9				P62280	1.1349	3.93529e-05	8.80949e-05		-1.97711	3.16643e-15	3.75865e-14		-2.92405	3.5921e-15	2.01031e-14
P62312	1	1	1		3	3	3				P62312	2.96932	6.07614e-06	1.58805e-05		0.816608	0.109885	0.139395		-2.15271	2.95065e-05	4.85179e-05
P62314	1	1	1		5	4	5				P62314	0.488145	0.585915	0.638462		-2.96785	3.12658e-10	1.92502e-09		-4.84108	7.11509e-10	2.1725e-09
P62316	1	1	1		7	7	8				P62316	-0.593231	0.45978	0.513373		-3.2308	1.11151e-15	1.39159e-14		-2.86165	4.58488e-13	1.98791e-12
P62318	1	1	1		2	2	2				P62318	-0.459283	0.166106	0.199531		-3.06672	2.63204e-06	8.61111e-06		-2.60744	1.58966e-05	2.71242e-05
P62330	1	1	1		4	3	4				P62330	3.07245	6.55143e-07	2.00634e-06		-0.203288	0.395943	0.453655		-3.61324	8.31466e-08	1.94702e-07
P62333	1	1	1		17	14	17				P62333	5.00828	7.02416e-30	2.12739e-28		1.26117	6.07119e-12	4.7452e-11		-3.68877	6.70599e-25	8.74113e-24
P62424	1	1	1		12	12	13				P62424	0.774435	0.0197925	0.0277391		-2.89273	7.57949e-26	2.29558e-24		-4.18265	5.07906e-26	7.16461e-25
P62495	1	1	1		7	5	7				P62495	2.48528	9.1816e-06	2.32139e-05		-0.696204	0.00577633	0.00935615		-2.89795	7.07675e-07	1.45382e-06
P62701	1	1	1		17	14	19				P62701	1.24434	2.41092e-09	1.0678e-08		-2.00423	1.29726e-25	3.90029e-24		-3.73149	5.72017e-30	1.12197e-28
P62714	1	1	1		7	4	7				P62714	4.34044	2.83447e-13	1.97216e-12		-0.148075	0.801455	0.851921		-4.74091	1.49386e-16	9.43742e-16
P62750	1	1	1		8	7	9				P62750	1.1475	0.00356136	0.00568576		-3.48858	6.79434e-18	1.16124e-16		-5.06893	9.28264e-16	5.47782e-15
P62753	1	1	1		10	10	13				P62753	0.895994	0.000976752	0.00172597		-3.76379	8.80407e-27	2.74727e-25		-4.81489	2.14192e-22	2.27974e-21
P62760	1	0	0		3	0	0				P62760	4.39247	3.25393e-05	7.44608e-05		1.58305	0.0190021	0.0279835		0.370936	0.896451	0.906798
P62805	1	1	1		10	11	12				P62805	-2.9421	1.31522e-16	1.35097e-15		-6.11406	1.03738e-30	4.69557e-29		-2.89532	2.64266e-19	2.10952e-18
P62820	1	1	1		6	5	5				P62820	4.15288	1.15813e-11	6.84413e-11		1.92941	2.61765e-07	1.01526e-06		-1.2891	0.00219064	0.00273763
P62826	1	1	1		9	7	9				P62826	6.05541	9.0501e-21	1.34091e-19		0.656177	0.00103243	0.00195792		-5.81701	2.34281e-20	2.09784e-19
P62829	1	1	1		6	5	6				P62829	2.70182	4.28776e-09	1.817e-08		-0.608603	0.0360945	0.0499742		-3.60557	9.28216e-10	2.79687e-09
P62834	1	1	1		7	7	7				P62834	1.82455	8.62525e-06	2.19034e-05		-0.740451	0.000879325	0.00169329		-2.61109	3.34433e-07	7.19713e-07
P62841	1	1	1		3	3	4				P62841	0.246501	0.951961	0.97662		-3.4316	4.41182e-09	2.23796e-08		-3.59334	1.01931e-07	2.34686e-07
P62847	1	1	1		6	5	6				P62847	0.60037	0.0996042	0.123501		-3.22551	1.66237e-13	1.59611e-12		-3.82588	1.66681e-10	5.46189e-10
P62851	1	1	1		6	6	7				P62851	0.638058	0.0377949	0.0505774		-2.90051	2.04411e-14	2.23928e-13		-3.7684	2.80822e-14	1.40207e-13
P62854	1	1	1		3	3	3				P62854	0.684025	0.0236251	0.032644		-3.44385	5.95244e-08	2.5593e-07		-4.12788	9.75488e-09	2.58727e-08
P62857	1	1	1		2	3	3				P62857	-1.20124	0.00253952	0.0041691		-2.33298	7.03578e-06	2.10613e-05		-1.13174	0.011354	0.0131849
P62879	1	1	1		7	5	7				P62879	3.38325	2.35729e-11	1.35232e-10		-0.112895	0.875633	0.919616		-3.29844	4.41213e-14	2.15838e-13
P62888	1	1	1		5	5	5				P62888	-0.0917897	0.920317	0.950786		-2.77619	1.48551e-11	1.1005e-10		-3.25188	4.0531e-10	1.26956e-09
P62899	1	1	1		5	4	6				P62899	1.69551	1.8004e-07	6.07357e-07		-1.65262	3.07849e-09	1.60307e-08		-3.6909	8.13601e-11	2.76859e-10
P62906	1	1	1		9	8	9				P62906	0.983135	4.82102e-06	1.28529e-05		-1.68001	2.32213e-09	1.24705e-08		-2.66314	8.05672e-13	3.38629e-12
P62910	1	1	1		4	3	6				P62910	3.85233	8.90224e-06	2.25513e-05		-2.46063	5.43329e-10	3.2294e-09		-6.2516	1.42761e-10	4.71935e-10
P62913	1	1	1		5	5	6				P62913	2.85718	1.40901e-09	6.49186e-09		0.0428811	1	1		-2.83964	1.44866e-11	5.38057e-11
P62917	1	1	1		5	4	6				P62917	1.84474	0.00242569	0.00399337		-2.92257	9.22348e-13	8.06614e-12		-4.14263	7.25578e-13	3.08109e-12
P62937	1	1	1		9	9	9				P62937	4.81683	3.64524e-22	6.03002e-21		1.15926	2.87448e-08	1.30306e-07		-4.44848	2.56659e-18	1.88782e-17
P62942	1	1	1		2	2	2				P62942	2.01215	0.000136065	0.000276085		-0.713373	0.0229783	0.0333032		-2.72552	2.42564e-05	4.04995e-05
P62979	1	1	1		6	6	6				P62979	1.08272	0.000608344	0.00111071		-1.62205	5.78321e-07	2.11554e-06		-2.50133	1.22279e-09	3.62611e-09
P62993	1	0	1		3	0	3				P62993	2.2048	0.000128212	0.00026131		-0.453873	0.11109	0.140707		-2.65867	5.39727e-05	8.5243e-05
P62995	1	1	1		5	6	8				P62995	-0.623673	0.399023	0.449187		-4.5353	3.0962e-16	4.19514e-15		-3.38839	7.58008e-15	4.08135e-14
P63000	1	1	1		5	5	5				P63000	3.88442	9.9328e-11	5.29964e-10		1.32984	2.41572e-06	7.96665e-06		-2.20459	2.73533e-09	7.69591e-09
P63010	1	1	1		11	10	12				P63010	3.32287	5.79228e-20	7.92638e-19		0.923948	2.48761e-05	6.75441e-05		-2.83642	2.87816e-21	2.80263e-20
P63027	1	0	1		2	0	2				P63027	5.11078	6.64919e-08	2.40246e-07		3.9445	8.09303e-07	2.89117e-06		-1.16628	0.00529182	0.00635853
P63092;Q5JWF2	1	1	1		13	12	14				P63092;Q5JWF2	3.21461	1.69075e-24	3.51728e-23		0.0985818	0.92928	0.968549		-3.0565	2.28747e-22	2.42837e-21
P63096	1	1	1		2	2	2				P63096	1.97574	0.000183875	0.000365002		-0.345225	0.213369	0.258111		-2.32097	2.17498e-05	3.64918e-05
P63098	1	0	1		2	0	2				P63098	7.30436	7.32443e-05	0.000155272		0.97724	0.0268052	0.0382971		-6.32712	0.000129567	0.000192631
P63104	1	1	1		11	10	11				P63104	2.55247	1.41184e-13	1.03846e-12		-0.318315	0.176607	0.216502		-2.78237	3.66476e-17	2.41522e-16
P63151	1	1	1		9	5	9				P63151	5.76733	1.04806e-22	1.86075e-21		0.95423	1.79563e-07	7.14609e-07		-4.88884	2.87064e-20	2.55382e-19
P63167	1	0	1		2	0	2				P63167	4.76854	6.48284e-05	0.000138577		-0.582856	0.158407	0.195529		-5.35139	7.36867e-05	0.000114018
P63172	0	0	1		0	0	2				P63172	3.8632	0.00226186	0.00373861		-2.28659	0.000854922	0.00165325		-6.1498	9.28678e-06	1.63891e-05
P63173	1	1	1		4	3	4				P63173	4.85852	4.69488e-07	1.47959e-06		-0.124826	0.729545	0.785443		-4.98335	2.50901e-09	7.1077e-09
P63208	1	1	1		3	3	3				P63208	3.14493	1.56863e-06	4.52463e-06		-0.0332942	0.988832	1		-2.85021	1.06966e-06	2.13984e-06
P63220	1	1	1		3	2	3				P63220	2.06904	9.217e-05	0.000192324		0.46978	0.543256	0.60396		-1.42167	0.00168446	0.00213749
P63241	1	1	1		4	4	4				P63241	2.69214	2.86609e-07	9.31763e-07		-0.933781	0.450669	0.509834		-2.87683	1.39657e-08	3.64311e-08
P63244	1	1	1		12	11	12				P63244	4.42037	5.59776e-23	1.02023e-21		0.0836346	0.999253	1		-4.40595	2.08975e-24	2.59267e-23
P63279	1	1	1		2	2	2				P63279	5.30626	1.11994e-06	3.3092e-06		0.0147045	0.870639	0.915304		-5.29155	1.20513e-06	2.39571e-06
P67809	1	1	1		15	17	17				P67809	-1.94827	9.14137e-14	6.87104e-13		-4.24142	4.88614e-39	3.87039e-37		-2.91243	4.39908e-24	5.23694e-23
P67812	1	1	1		3	2	3				P67812	3.64788	6.35009e-07	1.94903e-06		0.941352	0.0256322	0.0368256		-2.3316	7.11526e-06	1.2787e-05
P67936	1	1	1		6	5	7				P67936	2.15275	9.86409e-07	2.94524e-06		-1.34721	5.17552e-05	0.000131268		-2.99897	1.30228e-12	5.38023e-12
P68032	1	1	1		28	21	24				P68032	5.72751	6.76528e-54	1.21157e-51		1.13049	4.36453e-12	3.50438e-11		-3.74846	1.58243e-36	5.47734e-35
P68036	1	0	1		3	0	3				P68036	0.415825	0.365312	0.414523		-0.788457	0.259957	0.30929		-1.62547	0.00315887	0.00389446
P68104	1	1	1		9	7	9				P68104	4.07266	9.54693e-15	8.19246e-14		-0.59905	0.070473	0.0926814		-4.39117	1.60513e-17	1.09101e-16
P68363	1	1	1		19	23	20				P68363	3.21925	1.84996e-39	1.00263e-37		-0.0349962	1	1		-3.24575	2.75461e-36	9.22457e-35
P68366	1	1	1		3	3	3				P68366	3.41883	1.01636e-07	3.54777e-07		0.538425	0.0397589	0.0544981		-2.91069	2.14371e-07	4.73963e-07
P68371	1	1	1		22	19	22				P68371	4.45049	2.22693e-38	1.09199e-36		-0.0256709	1	1		-4.31013	6.16846e-39	2.46678e-37
P68400;Q8NEV1	1	1	1		8	4	6				P68400;Q8NEV1	6.32356	5.98146e-15	5.21984e-14		1.96228	5.15107e-10	3.07497e-09		-3.77552	3.95059e-08	9.72653e-08
P68402	1	0	1		2	0	2				P68402	8.11392	2.01355e-08	7.80226e-08		2.01454	0.0029031	0.00504552		-6.09938	3.76709e-06	7.0116e-06
P68431	1	1	1		4	5	5				P68431	-1.66741	0.0626191	0.0808806		-5.12159	1.17148e-09	6.6648e-09		-4.96129	3.83921e-07	8.16824e-07
P68871	0	1	1		0	3	3				P68871	0.882291	0.00448673	0.00704568		1.48138	0.00288592	0.0050199		-0.0462556	0.974771	0.979766
P69849;Q15155;Q5JPE7	0	0	1		0	0	2				P69849;Q15155;Q5JPE7	-0.439465	0.099052	0.122909		-3.1659	0.0165941	0.0246755		-2.72644	0.000673725	0.000902463
P69905	1	1	1		5	5	5				P69905	6.10685	1.80524e-13	1.30912e-12		5.93593	5.89478e-16	7.65949e-15		-0.82292	0.0341561	0.0381477
P78310	1	1	1		2	3	3				P78310	1.54802	0.0586359	0.0761177		-1.08124	0.000927734	0.00177571		-2.51987	1.04321e-05	1.82229e-05
P78344	1	1	1		13	6	14				P78344	4.10241	3.88515e-16	3.81022e-15		0.373217	0.705773	0.762013		-3.65322	2.33574e-14	1.17185e-13
P78346	1	1	1		4	3	5				P78346	2.51356	0.000229239	0.000447504		-1.22489	0.00169844	0.00308189		-3.58941	2.6103e-07	5.70692e-07
P78347	1	1	1		11	9	13				P78347	2.79729	1.85946e-13	1.34607e-12		-1.03975	0.0012875	0.00239748		-3.36099	6.45353e-20	5.58447e-19
P78356	1	1	1		5	3	5				P78356	3.46075	4.4896e-06	1.2016e-05		1.2381	4.52994e-05	0.000116182		-2.57376	0.000686333	0.000917562
P78362	1	1	1		5	4	7				P78362	2.03739	0.00129809	0.00224092		-2.80351	2.378e-05	6.49103e-05		-3.98287	1.57699e-15	9.17463e-15
P78371	1	1	1		28	25	32				P78371	2.85399	2.51543e-41	1.61892e-39		-0.695892	4.31912e-12	3.4747e-11		-4.01462	5.34542e-56	5.24233e-54
P78385	0	1	1		0	6	8				P78385	-0.629508	0.528053	0.582811		-1.73853	0.0110941	0.0170383		-0.72708	0.48484	0.50291
P78406	1	1	1		4	3	4				P78406	3.33438	3.36801e-09	1.45723e-08		-0.736689	0.00429326	0.00718567		-4.88187	9.84635e-12	3.71743e-11
P78417	1	1	1		4	6	7				P78417	0.809653	0.00997021	0.0147512		-3.6569	1.94654e-06	6.53981e-06		-4.46656	6.65694e-12	2.55069e-11
P78527	1	1	1		62	64	94				P78527	0.899384	4.86473e-05	0.000107269		-3.02389	4.24102e-90	1.74688e-87		-3.56982	7.03644e-131	5.79662e-128
P78539	1	1	1		3	3	4				P78539	1.21027	0.0129406	0.0187949		-2.16727	8.10569e-05	0.000196859		-3.45292	2.96751e-06	5.59414e-06
P78559	1	0	1		5	0	3				P78559	9.2746	8.23713e-09	3.36595e-08		4.10864	6.7208e-08	2.86573e-07		-6.01048	8.56855e-05	0.000131058
P80217	0	0	1		0	0	3				P80217	4.54962	0.00165128	0.00280363		0.0163983	0.998706	1		-2.80837	0.000330233	0.000461564
P80404	1	0	1		9	0	8				P80404	5.14634	9.51964e-17	9.95214e-16		2.66652	8.85111e-14	8.80621e-13		-3.04331	3.66828e-09	1.0168e-08
P80723	1	1	1		6	7	7				P80723	-0.928807	0.0352943	0.0475245		-2.78735	6.34834e-11	4.35813e-10		-1.93911	2.071e-09	5.94044e-09
P81605	1	1	1		2	3	3				P81605	-1.95933	0.000567058	0.00103856		-0.657452	0.269256	0.319247		1.56741	0.0436277	0.0483982
P81877	1	0	1		2	0	2				P81877	7.73629	1.59281e-07	5.41318e-07		0.525557	0.217673	0.263053		-7.21073	7.64086e-08	1.79844e-07
P82650	0	0	1		0	0	2				P82650	3.59385	6.57145e-05	0.00014032		0.408261	0.119484	0.150139		-3.18559	0.000173168	0.000252667
P82979	1	1	1		3	2	4				P82979	3.45274	1.33048e-06	3.88121e-06		-2.37156	2.53216e-06	8.29751e-06		-5.66989	7.86877e-10	2.39022e-09
P83436	1	0	1		3	0	4				P83436	6.06192	2.73267e-09	1.19999e-08		0.604735	0.0326039	0.0455633		-7.49594	2.18505e-13	9.96702e-13
P83731	1	1	1		4	4	4				P83731	0.940233	0.000808584	0.00144772		-2.87086	3.43872e-09	1.77051e-08		-4.29918	1.36848e-10	4.5348e-10
P83881	1	1	1		3	2	5				P83881	3.3282	1.08033e-05	2.70509e-05		-2.23798	0.00169657	0.00307985		-4.88181	6.40735e-12	2.46193e-11
P83916	0	1	1		0	2	2				P83916	-0.0184986	0.951144	0.976024		-2.14833	0.00351516	0.00598057		-2.12983	4.2404e-05	6.78742e-05
P84085	1	1	1		5	4	5				P84085	2.66639	1.14395e-09	5.3242e-09		-0.769877	0.000328283	0.000700621		-3.43627	1.12228e-09	3.3543e-09
P84090	1	0	1		2	0	2				P84090	2.92774	4.30741e-05	9.57487e-05		-0.231554	0.478182	0.537614		-3.1593	5.76969e-06	1.04785e-05
P84095	1	1	1		6	6	6				P84095	2.44497	4.28544e-09	1.817e-08		-0.609282	0.00312579	0.0053844		-3.12974	4.97402e-11	1.73187e-10
P84098	1	1	1		4	3	6				P84098	0.59382	0.0208063	0.0290512		-2.19477	1.24289e-08	5.93906e-08		-3.13341	5.07338e-11	1.76348e-10
P84103	1	1	1		3	4	5				P84103	0.421655	0.291851	0.337015		-3.33463	8.2803e-10	4.81052e-09		-3.98142	6.31952e-13	2.70302e-12
P98095	1	1	1		6	8	9				P98095	-2.25721	2.65425e-09	1.16679e-08		-3.21952	3.69595e-12	3.00862e-11		-1.01302	0.00851117	0.0100193
P98160	1	1	1		36	54	53				P98160	-2.75284	9.39375e-30	2.78366e-28		-2.79975	1.60195e-54	2.86888e-52		-0.453129	0.0282977	0.0318117
P98179	0	1	1		0	4	4				P98179	-1.3355	0.0175793	0.0248828		-4.01167	9.81394e-06	2.86896e-05		-2.63151	0.000174186	0.000253703
P98194	1	1	1		4	4	4				P98194	2.07451	0.000296286	0.000568687		-0.255228	0.507744	0.568469		-1.90803	1.67054e-06	3.24879e-06
P99999	0	1	1		0	3	4				P99999	0.670438	0.258714	0.301625		-2.79156	0.00221674	0.00392383		-3.46199	7.47347e-09	2.00935e-08
Q00059	0	0	1		0	0	7				Q00059	2.69926	4.16181e-05	9.27624e-05		-3.52682	2.10888e-08	9.7164e-08		-5.85543	3.47513e-09	9.67165e-09
Q00169	1	0	1		4	0	4				Q00169	4.27955	5.77399e-07	1.78284e-06		2.06616	1.46517e-05	4.15637e-05		-2.21339	0.000355721	0.000495004
Q00325	1	1	1		3	4	4				Q00325	2.74799	1.81947e-06	5.17927e-06		-0.0179775	0.999967	1		-2.92711	6.08868e-06	1.10384e-05
Q00341	1	1	1		14	12	19				Q00341	3.29153	3.42656e-22	5.69113e-21		-0.429813	0.00134917	0.00250326		-4.47541	1.72922e-31	3.72913e-30
Q00403	1	0	0		2	0	0				Q00403	5.33926	2.11653e-05	5.01611e-05		1.55676	0.00430358	0.0071988		-3.7825	0.000121669	0.000181941
Q00535	1	0	1		5	0	5				Q00535	4.50536	5.47819e-12	3.36284e-11		1.20358	1.09087e-05	3.15541e-05		-4.43258	3.31571e-09	9.253e-09
Q00577	1	1	1		7	7	7				Q00577	4.53792	4.42249e-16	4.30643e-15		2.82567	1.37198e-14	1.53983e-13		-1.66837	4.18742e-08	1.02912e-07
Q00610	1	1	1		78	71	76				Q00610	3.6827	1.00645e-123	1.38185e-120		-0.161275	0.9976	1		-3.76347	2.85424e-127	1.95944e-124
Q00688	1	1	1		3	5	4				Q00688	0.219105	0.677273	0.727428		-0.147979	0.792864	0.844315		-0.811369	0.00371958	0.00454897
Q00796	0	1	1		0	2	3				Q00796	5.55272	8.08901e-06	2.0682e-05		-1.43895	0.00919251	0.0143261		-3.87481	1.7274e-06	3.35147e-06
Q00839	1	1	1		19	15	19				Q00839	2.31665	1.18575e-19	1.59091e-18		-1.34858	3.32001e-17	5.21951e-16		-3.87676	1.15025e-31	2.53363e-30
Q01082	1	1	1		73	68	75				Q01082	2.73881	4.95903e-85	2.55328e-82		0.377632	9.66993e-05	0.000231572		-2.28091	1.60793e-76	3.89592e-74
Q01085	1	1	1		6	4	6				Q01085	5.52504	1.43115e-10	7.49989e-10		-0.332741	0.160612	0.198132		-5.66963	5.65462e-12	2.18698e-11
Q01105	1	1	1		3	3	4				Q01105	2.00875	3.28453e-06	8.96231e-06		-1.90076	3.99358e-07	1.49814e-06		-3.76192	1.36159e-10	4.51563e-10
Q01130	1	1	1		3	3	4				Q01130	-1.51726	0.000956342	0.00169208		-3.26914	1.56563e-07	6.28539e-07		-1.82822	2.02843e-06	3.90608e-06
Q01415	1	0	0		2	0	0				Q01415	8.22306	1.01407e-09	4.76823e-09		4.82212	0.00284589	0.00495654		-3.40094	0.0226707	0.0256752
Q01432	1	0	0		2	0	0				Q01432	7.99683	1.0012e-07	3.50367e-07		3.2467	8.81123e-05	0.000212865		-4.75012	9.46957e-06	1.66689e-05
Q01433	1	0	1		7	0	5				Q01433	9.31515	1.2551e-14	1.05721e-13		3.40446	7.15254e-12	5.53784e-11		-4.13807	1.15057e-09	3.43171e-09
Q01469	1	1	1		3	3	3				Q01469	-0.73818	0.0398642	0.0531222		0.176296	0.945784	0.981565		0.914477	0.0685051	0.074827
Q01484	1	0	1		13	0	3				Q01484	4.9314	3.03651e-20	4.28335e-19		1.9322	2.24448e-09	1.20797e-08		-1.63945	0.00517502	0.00623089
Q01518	1	1	1		10	10	15				Q01518	1.25813	0.00376221	0.00598322		-1.91316	9.61336e-12	7.3058e-11		-3.40205	3.21469e-22	3.37789e-21
Q01581	1	1	1		5	5	6				Q01581	2.18198	2.71321e-08	1.03383e-07		-2.13709	2.58451e-09	1.37896e-08		-3.77374	3.27883e-14	1.62521e-13
Q01628	1	1	1		3	2	3				Q01628	2.64668	2.37339e-05	5.58629e-05		-1.59303	4.28536e-05	0.000110736		-3.87349	3.869e-07	8.22737e-07
Q01650	1	1	1		5	5	5				Q01650	-0.6137	0.118205	0.145166		-2.37565	6.19339e-08	2.65183e-07		-1.9552	2.57378e-05	4.27648e-05
Q01780	1	1	1		9	8	18				Q01780	2.19051	1.19629e-14	1.01181e-13		-2.53223	4.88559e-20	9.72161e-19		-4.45005	1.82049e-36	6.24883e-35
Q01813	1	1	1		16	18	21				Q01813	1.49859	0.000275759	0.000531516		-3.56885	8.63319e-23	2.1683e-21		-3.64684	7.8958e-36	2.54084e-34
Q01831	0	0	1		0	0	3				Q01831	2.54753	0.0498202	0.0654785		-1.93376	9.41714e-05	0.000226176		-3.56422	9.68838e-05	0.000146877
Q01844	1	1	1		5	5	5				Q01844	1.38757	1.89933e-06	5.37319e-06		-3.6665	3.41713e-12	2.80381e-11		-4.82801	3.67256e-15	2.04699e-14
Q01968	1	1	1		8	6	11				Q01968	3.74101	3.09403e-10	1.55418e-09		1.04801	0.000600084	0.00120397		-4.92022	5.2166e-21	4.9624e-20
Q01970	0	0	1		0	0	4				Q01970	-0.856855	0.287786	0.332601		-3.33664	1.28281e-05	3.67193e-05		-2.66397	6.5481e-05	0.000102088
Q01974	0	0	1		0	0	2				Q01974	1.28993	0.751224	0.796062		-4.50743	0.00522663	0.00857368		-5.79736	0.00519563	0.00625389
Q01995	1	1	1		11	8	12				Q01995	4.95817	6.5531e-18	7.56085e-17		2.20017	6.77677e-12	5.2667e-11		-2.90942	5.76171e-13	2.47441e-12
Q02153	1	0	0		2	0	0				Q02153	5.04286	0.0149954	0.0215438		0.373964	0.196634	0.23906		-4.6689	0.0282195	0.0317325
Q02218	1	0	1		21	0	16				Q02218	8.44181	1.56978e-40	9.65066e-39		4.63323	1.2883e-37	9.4231e-36		-3.98196	8.92646e-15	4.76888e-14
Q02241	1	1	1		12	16	19				Q02241	-0.165424	0.989687	1		-3.21528	5.22082e-27	1.6542e-25		-3.54361	9.97315e-28	1.6173e-26
Q02252	1	0	1		11	0	9				Q02252	6.90482	1.68209e-23	3.26818e-22		5.00409	1.71024e-17	2.79542e-16		-3.38661	3.73705e-13	1.64806e-12
Q02413	1	1	1		13	16	16				Q02413	-2.18382	6.95424e-10	3.38588e-09		-0.301728	0.989568	1		1.87154	3.94109e-05	6.3362e-05
Q02543	1	1	1		5	5	6				Q02543	2.30581	0.000910294	0.00161686		-2.43051	3.41881e-09	1.76246e-08		-6.32955	3.84545e-11	1.35264e-10
Q02750	1	0	1		10	0	8				Q02750	7.96458	2.4951e-19	3.23186e-18		1.96528	2.97085e-10	1.84848e-09		-5.6154	1.73317e-14	8.92366e-14
Q02790	1	1	1		13	11	14				Q02790	1.23731	0.170147	0.20385		-1.51236	0.000195709	0.00043598		-2.43779	3.29815e-19	2.61251e-18
Q02809	1	1	1		17	16	24				Q02809	1.06461	7.32012e-05	0.00015526		-3.83146	7.66589e-44	8.27483e-42		-4.6995	3.26299e-39	1.34403e-37
Q02818	1	1	1		6	8	8				Q02818	1.11941	0.0392313	0.0523634		0.152909	0.985606	1		-1.42413	0.000432695	0.0005933
Q02878	1	1	1		15	17	19				Q02878	0.202713	0.918535	0.949306		-3.35683	1.80643e-34	1.09422e-32		-3.66453	1.07827e-26	1.59762e-25
Q02880	1	1	1		12	20	35				Q02880	1.31138	0.127628	0.155625		-3.18047	1.304e-37	9.4231e-36		-4.08893	1.4521e-48	9.96868e-47
Q02952	1	1	1		6	7	7				Q02952	0.824123	0.00961005	0.0142747		-2.17764	2.42856e-06	8.00258e-06		-2.30997	1.16283e-09	3.46078e-09
Q02978	0	0	1		0	0	2				Q02978	2.66943	0.0773081	0.0979489		-3.4103	0.0777736	0.101312		-6.07973	1.81181e-08	4.63819e-08
Q03001	1	0	1		7	0	12				Q03001	3.83081	1.07901e-19	1.4572e-18		-0.315822	0.564343	0.624705		-5.49078	1.58925e-18	1.19237e-17
Q03135	1	1	1		2	6	5				Q03135	-2.15932	2.07562e-05	4.9305e-05		-2.7294	2.51201e-08	1.14966e-07		-1.61479	0.000128765	0.000191543
Q03252	1	1	1		7	10	11				Q03252	-0.0578794	0.999545	1		-2.70226	1.95652e-10	1.25724e-09		-2.00887	4.0828e-13	1.79095e-12
Q04206	1	1	1		4	4	6				Q04206	2.86489	5.78812e-12	3.53728e-11		-1.25069	2.93269e-08	1.32308e-07		-4.07965	1.03382e-14	5.44543e-14
Q04323	1	1	1		2	2	4				Q04323	5.28423	7.58428e-06	1.95248e-05		0.246769	0.222404	0.268174		-4.23403	2.14269e-06	4.11266e-06
Q04446	1	1	1		10	5	11				Q04446	5.54296	1.45924e-16	1.47681e-15		3.9512	1.21161e-07	4.90721e-07		-3.31835	3.73337e-09	1.03276e-08
Q04637	1	1	1		14	16	18				Q04637	2.46818	3.40939e-23	6.29743e-22		-0.318458	0.736839	0.792232		-2.88048	1.4483e-25	1.97534e-24
Q04695	1	1	1		7	15	15				Q04695	-1.85829	0.000461045	0.000857744		-2.8059	0.000179113	0.000403593		-1.34055	0.332004	0.347528
Q04721	0	1	1		0	4	7				Q04721	-0.790535	0.473879	0.527542		-4.65122	1.20108e-07	4.86933e-07		-3.86068	4.19088e-12	1.65347e-11
Q04760	1	1	1		2	3	3				Q04760	2.24179	2.71022e-06	7.45717e-06		0.453334	0.067721	0.0893826		-3.06343	4.88919e-06	8.99043e-06
Q04837	1	1	1		4	6	6				Q04837	-2.38322	1.94483e-07	6.5181e-07		-4.1131	1.57317e-12	1.32784e-11		-1.43161	1.43702e-05	2.46835e-05
Q04917	1	1	1		11	9	11				Q04917	3.70939	6.41155e-16	6.17037e-15		0.169987	0.928663	0.96828		-3.55371	4.07549e-20	3.60235e-19
Q05048	1	0	1		3	0	3				Q05048	5.16915	3.22596e-07	1.03973e-06		0.292765	0.415889	0.474265		-5.11802	2.83651e-07	6.16875e-07
Q05086	1	0	1		5	0	7				Q05086	5.78429	1.53653e-10	8.01472e-10		1.51068	5.41856e-09	2.71191e-08		-5.33269	1.69498e-08	4.36351e-08
Q05193	1	0	1		9	0	10				Q05193	4.18395	1.90086e-14	1.55969e-13		-0.122187	0.986057	1		-4.6287	4.75201e-16	2.87424e-15
Q05209	1	1	1		3	3	3				Q05209	4.18372	0.00100096	0.00176647		-1.83541	0.016606	0.0246843		-6.01912	0.000161763	0.00023695
Q05519	0	1	1		0	3	8				Q05519	2.93339	7.17774e-05	0.000152555		-4.43884	2.5082e-12	2.06625e-11		-6.35958	9.80795e-18	6.83569e-17
Q05639	1	1	1		23	15	19				Q05639	5.16761	4.21507e-46	4.23461e-44		0.709397	9.92098e-08	4.08645e-07		-4.11708	5.87269e-37	2.1219e-35
Q05655	0	0	1		0	0	2				Q05655	3.91436	0.137371	0.166814		-4.06474	0.0518732	0.0698025		-7.9791	4.70838e-10	1.46701e-09
Q05682	1	1	1		4	10	10				Q05682	-1.86197	0.00967354	0.0143587		-2.88733	4.65174e-07	1.72929e-06		-1.33291	0.000124141	0.000185267
Q05707	1	0	0		12	0	0				Q05707	6.80361	1.44541e-21	2.28108e-20		3.64563	3.79625e-16	5.0934e-15		-2.5234	0.000263185	0.000372786
Q06124	1	1	1		9	6	9				Q06124	3.43888	2.15674e-16	2.16147e-15		1.30437	9.29419e-08	3.84365e-07		-2.69783	9.45861e-14	4.50405e-13
Q06203	1	1	1		3	4	5				Q06203	2.53761	2.2767e-10	1.16349e-09		0.266641	0.26243	0.311998		-2.74223	1.35413e-10	4.4981e-10
Q06210	1	1	1		21	15	20				Q06210	4.44736	1.68038e-35	7.06276e-34		1.92039	1.34196e-23	3.52073e-22		-2.89121	3.2245e-27	4.95586e-26
Q06265	0	1	1		0	2	2				Q06265	-2.08632	0.551726	0.605531		-4.88086	0.0598016	0.0797678		-2.79454	1.27792e-06	2.53066e-06
Q06278	1	0	0		2	0	0				Q06278	8.2551	3.19101e-09	1.38647e-08		3.77161	0.00125423	0.00234081		-4.48349	0.000654226	0.0008772
Q06323	1	1	1		9	10	12				Q06323	1.81154	5.03762e-11	2.78523e-10		-0.530929	0.000556842	0.00112426		-2.35083	2.40914e-16	1.49898e-15
Q06587	1	0	1		2	0	2				Q06587	8.34457	0.000236737	0.00046105		0.933561	0.0255971	0.036788		-7.41101	0.000535205	0.000724691
Q06787	1	1	1		5	5	6				Q06787	0.469998	0.966089	0.989142		-3.46573	5.16575e-09	2.59801e-08		-3.6634	5.03737e-11	1.75244e-10
Q06830	1	1	1		14	13	15				Q06830	2.72212	7.85011e-15	6.79298e-14		-0.705767	0.00164479	0.00299376		-3.03303	2.74881e-24	3.35975e-23
Q07020	1	1	1		6	5	7				Q07020	1.36665	3.27127e-05	7.48159e-05		-2.20934	4.72096e-12	3.76124e-11		-3.68216	1.44049e-12	5.90385e-12
Q07021	0	0	1		0	0	4				Q07021	0.551303	0.512164	0.56725		-2.84783	1.12287e-05	3.23887e-05		-3.62323	5.04437e-07	1.0531e-06
Q07065	1	1	1		6	12	16				Q07065	1.85163	0.000349265	0.000659616		-1.78828	3.96818e-08	1.74439e-07		-3.50459	1.03694e-19	8.78842e-19
Q07157	1	1	1		12	23	31				Q07157	-0.304277	0.786497	0.827902		-3.87625	3.95302e-38	3.01527e-36		-3.5277	1.29217e-41	6.04825e-40
Q07666	1	1	1		7	6	8				Q07666	2.1882	0.000280943	0.00054075		-2.33468	3.93844e-13	3.62918e-12		-4.06221	3.34282e-17	2.20659e-16
Q07812	1	1	1		4	5	5				Q07812	0.48717	0.142957	0.17329		-0.812371	0.00092492	0.00177115		-1.26124	4.84808e-05	7.69528e-05
Q07866	1	1	1		12	8	12				Q07866	4.0363	4.19377e-20	5.81621e-19		0.43268	0.10696	0.13602		-3.64588	2.37199e-20	2.11936e-19
Q07889	1	0	1		3	0	2				Q07889	6.95626	2.45881e-06	6.81549e-06		1.70595	6.20351e-06	1.883e-05		-4.67011	2.20467e-05	3.69599e-05
Q07954	1	1	1		15	7	15				Q07954	4.27057	4.58634e-24	9.35205e-23		1.67787	1.74012e-12	1.45979e-11		-2.45493	1.89188e-14	9.69237e-14
Q07955	1	1	1		5	10	10				Q07955	-1.70107	1.98721e-09	8.90678e-09		-3.88338	1.53374e-18	2.72305e-17		-1.98011	3.92363e-13	1.72481e-12
Q07960	1	1	1		6	4	9				Q07960	3.56207	2.55931e-14	2.06555e-13		0.253717	0.823173	0.870737		-4.26665	3.23592e-14	1.60587e-13
Q08170	0	0	1		0	0	4				Q08170	2.43572	0.000832643	0.00148572		-1.87411	1.60547e-05	4.52631e-05		-3.05667	3.77882e-06	7.03024e-06
Q08188	0	1	1		0	10	9				Q08188	-2.14044	2.61065e-05	6.0925e-05		-1.73878	0.157242	0.194265		0.433876	0.860754	0.872618
Q08209	1	1	1		7	6	7				Q08209	4.7432	1.87989e-14	1.54556e-13		2.21608	3.87709e-11	2.73454e-10		-2.66236	6.09389e-10	1.87739e-09
Q08211	1	1	1		38	30	45				Q08211	2.71456	9.75477e-33	3.55574e-31		-2.76211	9.46396e-64	2.16567e-61		-5.25559	3.15793e-86	8.67167e-84
Q08257	1	1	1		4	4	6				Q08257	5.74247	1.07759e-13	8.02637e-13		2.69603	2.25648e-10	1.43433e-09		-2.21912	1.35666e-10	4.50288e-10
Q08378	1	0	0		2	0	0				Q08378	5.95588	1.42662e-05	3.49776e-05		1.59444	0.218428	0.263843		-4.36143	0.00660323	0.00786089
Q08380	1	1	1		19	21	21				Q08380	-0.373393	0.0769975	0.0976477		-3.89115	6.05846e-41	5.09281e-39		-3.49102	3.60714e-35	1.04633e-33
Q08431	1	1	1		17	15	20				Q08431	2.55994	3.27606e-14	2.61906e-13		-2.40378	2.66892e-22	6.46663e-21		-4.35158	6.30934e-31	1.3396e-29
Q08499	1	0	0		2	0	0				Q08499	8.55507	8.00545e-10	3.85216e-09		2.11747	0.00190742	0.00341743		-6.4376	0.000162131	0.000237404
Q08554	1	1	1		3	4	3				Q08554	-1.73504	0.023769	0.0328318		-0.450942	0.806505	0.856184		1.2841	0.20802	0.221176
Q08629	0	1	1		0	7	6				Q08629	-4.65116	3.75488e-08	1.40094e-07		-2.03228	0.0982637	0.125854		2.04043	1.75273e-05	2.97183e-05
Q08722	1	1	1		4	3	3				Q08722	0.231034	0.781163	0.822708		-2.49894	1.11758e-06	3.89451e-06		-2.6472	9.53659e-08	2.21054e-07
Q08752	1	1	1		11	6	8				Q08752	8.79547	2.08196e-22	3.52905e-21		4.46249	3.36721e-19	6.30434e-18		-4.1801	8.73758e-07	1.77204e-06
Q08945	1	1	1		10	12	13				Q08945	-0.795006	0.00527356	0.00817223		-1.71389	8.58842e-14	8.56554e-13		-1.19724	3.54767e-07	7.59899e-07
Q08AM6	1	1	1		3	3	5				Q08AM6	3.42217	0.000154477	0.000310689		-0.456159	0.323241	0.377389		-3.87833	2.08824e-09	5.9857e-09
Q08J23	1	1	1		5	8	8				Q08J23	1.14684	0.00010319	0.000213266		-1.33684	2.81248e-06	9.14335e-06		-2.56613	1.0594e-12	4.41668e-12
Q09028	1	1	1		3	3	3				Q09028	4.08272	3.47502e-08	1.30718e-07		1.32574	0.00570489	0.00926436		-2.75698	3.12436e-05	5.117e-05
Q09161	1	1	1		9	8	11				Q09161	1.70854	4.2493e-06	1.13877e-05		-1.79988	8.70068e-11	5.86549e-10		-3.58123	1.18541e-08	3.11994e-08
Q09666	1	1	1		57	159	170				Q09666	-1.28805	6.5499e-40	3.74709e-38		-3.83897	7.25482e-178	2.98826e-174		-2.42875	1.98406e-168	2.72411e-165
Q0IIM8	1	0	0		7	0	0				Q0IIM8	6.57071	1.97482e-12	1.26309e-11		3.59844	5.73315e-07	2.0991e-06		-3.27423	0.000645756	0.000866125
Q10471	1	1	1		9	13	13				Q10471	-1.08611	8.13174e-07	2.45202e-06		-1.41388	3.89053e-10	2.36707e-09		-0.440102	0.0423308	0.0470102
Q10567	1	1	1		23	12	23				Q10567	4.36845	2.29282e-37	1.06114e-35		1.4379	8.74752e-21	1.89637e-19		-2.91069	2.83863e-28	4.87179e-27
Q10570	1	1	1		7	8	9				Q10570	2.53416	1.59858e-08	6.28898e-08		-0.953705	0.000119819	0.000281055		-3.38992	5.4704e-14	2.64157e-13
Q10588	0	1	1		0	3	4				Q10588	-2.64011	0.0016777	0.00284381		-4.65713	6.97866e-08	2.95732e-07		-2.56059	6.85351e-08	1.62895e-07
Q10713	1	1	1		7	4	13				Q10713	4.09474	8.35315e-07	2.51694e-06		-1.21343	1.84271e-07	7.32636e-07		-7.70137	9.11976e-15	4.85955e-14
Q12756	1	0	1		15	0	6				Q12756	6.21364	1.75346e-22	3.04747e-21		2.24029	7.34947e-15	8.45599e-14		-3.98668	1.30811e-12	5.39891e-12
Q12765	1	1	1		4	6	6				Q12765	-0.0265703	0.999994	1		-3.7369	2.22483e-07	8.77786e-07		-3.16594	5.08445e-11	1.76584e-10
Q12768	1	0	1		7	0	8				Q12768	5.42382	3.17086e-13	2.1914e-12		1.74	2.74659e-10	1.71933e-09		-4.24112	6.38226e-10	1.96037e-09
Q12769	0	0	1		0	0	2				Q12769	6.57684	0.000845318	0.001506		-2.27804	0.00144545	0.0026651		-8.85488	6.24124e-05	9.74514e-05
Q12792	1	1	1		2	3	5				Q12792	2.79679	0.00360413	0.00574958		-1.54167	0.0371999	0.0512462		-2.59838	1.8943e-11	6.94183e-11
Q12805	1	1	1		3	3	3				Q12805	-3.28436	4.10509e-06	1.10516e-05		-2.4896	0.00575381	0.00933068		1.57426	0.00708524	0.0084104
Q12824	1	1	1		4	4	4				Q12824	0.662659	0.0153194	0.0219557		-0.748345	0.0268602	0.0383491		-1.51192	0.000265474	0.00037577
Q12841	0	1	1		0	7	5				Q12841	-3.21264	6.68062e-09	2.76095e-08		-2.73444	2.82549e-08	1.28457e-07		0.458465	0.234946	0.248969
Q12846	1	1	1		7	7	7				Q12846	0.250311	0.842044	0.878515		-1.92935	1.85513e-09	1.01478e-08		-2.74605	1.19719e-09	3.55789e-09
Q12849	0	0	1		0	0	2				Q12849	1.61477	0.0141763	0.020424		-1.70669	0.0193731	0.0284484		-3.32146	1.40391e-05	2.41449e-05
Q12874	1	1	1		11	12	12				Q12874	0.431469	0.0723847	0.0922502		-0.532882	0.00189715	0.0034005		-0.872834	9.86205e-06	1.72932e-05
Q12882	1	0	0		5	0	0				Q12882	7.54777	3.0137e-06	8.27562e-06		2.19614	0.000105524	0.000251099		-5.39955	0.00121223	0.00156722
Q12888	1	1	1		4	9	13				Q12888	2.12013	7.77624e-08	2.78041e-07		-1.78414	2.28082e-10	1.44756e-09		-3.8196	1.65904e-21	1.64269e-20
Q12899	1	1	1		4	2	9				Q12899	0.301193	0.796108	0.836523		-4.85856	2.25837e-14	2.45441e-13		-5.57587	1.69368e-12	6.89353e-12
Q12904	1	1	1		4	5	6				Q12904	1.17285	3.66043e-05	8.29106e-05		-1.05943	0.809877	0.858878		-2.44306	4.95719e-09	1.35312e-08
Q12905	1	1	1		12	12	13				Q12905	1.34859	6.23534e-09	2.60217e-08		-1.4911	1.70024e-14	1.88261e-13		-2.83969	1.28582e-19	1.07426e-18
Q12906	1	1	1		19	20	27				Q12906	1.50649	1.47426e-09	6.76977e-09		-1.73651	1.68839e-22	4.13958e-21		-3.4785	8.67212e-34	2.31951e-32
Q12907	1	1	1		8	8	8				Q12907	1.48356	0.000317648	0.000606299		-0.378834	0.0787497	0.102519		-2.33076	1.26344e-09	3.7359e-09
Q12913	0	1	1		0	6	6				Q12913	-1.61066	0.00182915	0.0030727		-3.73243	1.29017e-09	7.3098e-09		-2.34476	1.50717e-08	3.90933e-08
Q12929	1	0	1		2	0	5				Q12929	1.54696	0.00925915	0.0137833		-3.06122	1.51502e-06	5.19166e-06		-6.75558	1.06922e-08	2.82498e-08
Q12931	1	0	1		3	0	6				Q12931	3.6771	0.0012208	0.00211636		-2.98983	0.00468881	0.00779701		-3.81373	2.40125e-10	7.6732e-10
Q12955	1	0	0		11	0	0				Q12955	5.41759	5.84834e-22	9.55924e-21		2.77027	1.66329e-08	7.77652e-08		-2.92021	2.99419e-05	4.91293e-05
Q12959	1	1	1		10	10	11				Q12959	0.512408	0.229893	0.270397		-1.58238	1.17233e-11	8.77967e-11		-2.52355	1.6647e-15	9.65761e-15
Q12965	1	1	1		5	11	16				Q12965	1.06056	3.11766e-05	7.16451e-05		-2.5807	8.95564e-16	1.12464e-14		-3.43558	3.9643e-21	3.81518e-20
Q12972	1	0	1		3	0	3				Q12972	6.87947	2.64771e-06	7.3047e-06		0.256112	0.533841	0.593974		-6.14777	0.000856927	0.00112986
Q12974	0	0	1		0	0	3				Q12974	2.58945	0.000272364	0.000525465		-0.644103	0.235082	0.281893		-3.16003	6.26209e-06	1.13328e-05
Q12979	1	1	1		4	2	4				Q12979	3.81746	1.51402e-07	5.15819e-07		0.320401	0.671454	0.730512		-3.74016	0.000253277	0.000360113
Q12996	1	1	1		4	4	4				Q12996	2.81878	7.79516e-08	2.78476e-07		0.337715	0.387844	0.444994		-2.15326	6.65851e-07	1.37395e-06
Q13017	1	0	1		2	0	2				Q13017	5.19104	7.65947e-07	2.32322e-06		1.3549	0.000973083	0.00185304		-3.83614	4.29263e-06	7.95024e-06
Q13033	1	0	1		4	0	4				Q13033	6.33445	1.29633e-07	4.46081e-07		1.19283	0.0488163	0.0659476		-5.61247	3.41604e-05	5.56154e-05
Q13042	0	1	1		0	3	5				Q13042	1.18618	0.00324167	0.00521783		-2.22102	4.41107e-07	1.64427e-06		-4.02256	1.80463e-11	6.64874e-11
Q13043	1	0	1		3	0	4				Q13043	2.4055	0.000822362	0.00146891		-0.272966	0.942704	0.979319		-2.84186	2.72299e-05	4.50463e-05
Q13045	1	1	1		6	10	11				Q13045	1.50835	5.81715e-07	1.79425e-06		-1.71904	2.45068e-05	6.67616e-05		-2.92324	1.68034e-15	9.73464e-15
Q13057	1	0	1		4	0	5				Q13057	5.51998	1.35447e-08	5.38521e-08		0.821017	9.05041e-05	0.000218387		-4.69896	1.87722e-09	5.42614e-09
Q13085	1	1	1		22	15	35				Q13085	2.63273	1.91768e-20	2.75223e-19		-1.54285	4.02153e-27	1.28408e-25		-4.33427	2.6259e-49	1.86484e-47
Q13098	1	1	1		8	8	10				Q13098	5.34964	2.44946e-20	3.46712e-19		1.77033	6.7976e-10	3.9942e-09		-3.90408	2.23742e-15	1.28355e-14
Q13107	1	0	1		5	0	4				Q13107	2.9448	1.33706e-08	5.32111e-08		1.58669	2.23011e-05	6.11573e-05		-2.65915	0.000788961	0.00104493
Q13111	0	0	1		0	0	2				Q13111	0.89571	0.328974	0.37661		-5.10364	0.00126466	0.00235814		-5.99935	0.000955587	0.00125193
Q13112	0	0	1		0	0	8				Q13112	4.90832	1.43811e-06	4.17448e-06		-3.85327	3.08762e-11	2.21181e-10		-8.96968	1.71513e-15	9.92222e-15
Q13123	1	0	1		4	0	5				Q13123	2.90621	0.0954844	0.119038		-2.32079	1.67903e-05	4.7047e-05		-5.2171	9.27358e-09	2.46438e-08
Q13126	0	1	1		0	3	4				Q13126	0.76839	0.074492	0.0947015		-3.00285	7.53655e-07	2.71119e-06		-3.73696	2.39684e-08	6.06076e-08
Q13131	1	1	1		4	3	4				Q13131	2.94512	1.62121e-08	6.36584e-08		0.100044	0.977454	1		-3.31667	1.11813e-08	2.94851e-08
Q13148	1	1	1		5	4	4				Q13148	3.00437	1.83634e-12	1.17818e-11		0.820205	0.000284675	0.000613593		-2.9592	5.2701e-08	1.27466e-07
Q13151	1	1	1		6	5	6				Q13151	2.58171	5.23652e-09	2.2077e-08		-2.23381	3.93476e-07	1.48039e-06		-4.40263	1.19816e-13	5.6274e-13
Q13155	1	0	1		2	0	2				Q13155	4.00424	0.0150188	0.0215624		-1.16001	0.0673708	0.0889994		-5.16425	0.000523604	0.000709916
Q13162	1	1	1		4	3	3				Q13162	3.41088	2.4541e-08	9.38572e-08		0.454363	0.0901938	0.11606		-2.86323	6.10966e-07	1.26588e-06
Q13177	1	1	1		7	7	8				Q13177	4.12491	1.8575e-14	1.53021e-13		0.890299	6.14565e-05	0.000153139		-2.91925	4.28998e-11	1.50515e-10
Q13185	1	1	1		2	3	3				Q13185	1.16495	0.00338837	0.00543264		-2.18722	1.63203e-05	4.58864e-05		-3.35178	2.18401e-06	4.1822e-06
Q13190	1	0	1		5	0	5				Q13190	5.72407	7.4894e-10	3.62501e-09		-1.3974	4.73946e-05	0.000121178		-7.62754	0.000747963	0.000992544
Q13200	1	1	1		33	27	35				Q13200	3.88219	4.40813e-48	5.31851e-46		0.743888	1.07521e-11	8.11134e-11		-2.97444	3.99648e-41	1.80896e-39
Q13214	0	1	1		0	4	7				Q13214	-0.0846653	0.9753	0.996495		-3.82611	1.52834e-06	5.2286e-06		-3.66381	1.11685e-11	4.18972e-11
Q13228	1	1	0		7	4	0				Q13228	6.74622	1.02819e-13	7.67231e-13		3.08407	2.74099e-05	7.34557e-05		-2.87914	1.00477e-06	2.01786e-06
Q13232	1	0	0		2	0	0				Q13232	3.01849	3.01697e-06	8.27907e-06		4.2198	0.000351119	0.000744727		1.2013	0.16845	0.18008
Q13242	1	1	1		3	4	7				Q13242	-0.521828	0.310723	0.357205		-3.99404	1.43203e-15	1.75551e-14		-4.29543	9.32744e-15	4.95739e-14
Q13243	1	1	1		4	4	5				Q13243	1.81514	0.0045458	0.00712216		-3.68064	1.49488e-06	5.1269e-06		-4.97351	1.1514e-13	5.42015e-13
Q13247	1	1	1		7	8	9				Q13247	0.730463	0.0237834	0.0328407		-2.50358	4.34781e-13	3.97087e-12		-2.55732	2.03356e-13	9.30692e-13
Q13253	0	0	1		0	0	2				Q13253	1.88032	0.231827	0.27236		-4.31524	0.000374738	0.000787524		-6.19556	0.000229353	0.000328707
Q13263	1	1	1		17	17	17				Q13263	2.01738	5.83124e-18	6.78499e-17		-1.22867	1.16404e-15	1.44418e-14		-3.17141	2.07584e-28	3.63846e-27
Q13275	0	0	1		0	0	3				Q13275	0.98003	0.0141043	0.0203386		-3.29374	1.02926e-07	4.22265e-07		-4.0449	1.93916e-09	5.58951e-09
Q13277	0	1	1		0	3	3				Q13277	1.40658	0.00937446	0.013934		-1.26989	0.0287707	0.040682		-2.47914	5.66579e-06	1.02989e-05
Q13283	1	1	1		11	10	13				Q13283	1.60104	4.88741e-05	0.000107711		-2.25529	3.2287e-17	5.09541e-16		-3.62893	9.35906e-24	1.08898e-22
Q13308	1	1	1		15	15	16				Q13308	0.438826	0.0379552	0.0507589		-1.94426	2.64143e-19	4.99085e-18		-2.0167	6.47407e-19	5.02198e-18
Q13309	0	0	1		0	0	2				Q13309	5.51346	5.39516e-06	1.42727e-05		-1.2664	0.0334018	0.0465906		-6.77986	7.46448e-09	2.00824e-08
Q13310	1	1	1		5	4	5				Q13310	3.7045	5.38914e-09	2.2674e-08		1.32513	1.3134e-05	3.75688e-05		-2.08415	3.44122e-07	7.39404e-07
Q13315	0	0	1		0	0	5				Q13315	1.26559	0.12138	0.148445		-1.87511	0.00600196	0.00968734		-6.66322	1.72218e-06	3.34607e-06
Q13330	1	0	1		2	0	4				Q13330	3.56467	2.44125e-05	5.72312e-05		-0.21785	0.474249	0.533725		-3.68192	2.24275e-07	4.94268e-07
Q13332	1	1	1		2	4	4				Q13332	-1.93687	0.613204	0.665556		0.42245	0.5261	0.586946		-0.372401	0.588156	0.605805
Q13347	1	1	1		12	11	12				Q13347	1.85674	5.54365e-12	3.39291e-11		-0.692066	6.14955e-05	0.000153144		-2.44632	3.71966e-14	1.83929e-13
Q13362	1	0	1		3	0	3				Q13362	2.87032	3.51217e-05	7.9794e-05		0.693001	0.0451929	0.0613545		-3.6384	0.000140282	0.000207327
Q13363	1	0	1		5	0	5				Q13363	7.83231	9.77574e-10	4.61769e-09		4.16481	7.56502e-12	5.82436e-11		-2.08595	6.96493e-05	0.000108218
Q13367	1	0	0		11	0	0				Q13367	4.18755	7.4746e-19	9.35802e-18		2.12875	3.74963e-07	1.42086e-06		-0.820291	0.277908	0.292763
Q13404	1	1	1		4	4	4				Q13404	1.2165	0.000149927	0.000302423		-1.80751	5.40162e-07	1.9849e-06		-3.18776	1.23119e-08	3.23836e-08
Q13409	1	1	1		15	11	15				Q13409	4.63502	2.37273e-26	5.58474e-25		0.977603	2.57198e-09	1.37406e-08		-3.48278	4.99476e-21	4.77341e-20
Q13418	1	1	1		10	6	9				Q13418	4.04251	2.32842e-14	1.89167e-13		1.21833	0.000310106	0.000664236		-2.76675	5.47159e-12	2.12018e-11
Q13425	1	1	1		8	11	12				Q13425	1.28963	2.23062e-07	7.39175e-07		-1.80422	3.39595e-13	3.15755e-12		-3.64446	2.03282e-19	1.6418e-18
Q13428	1	1	1		5	12	13				Q13428	-2.16651	3.45786e-10	1.72851e-09		-4.85079	1.25181e-23	3.30527e-22		-3.7884	1.72717e-20	1.58446e-19
Q13435	1	1	1		17	16	19				Q13435	0.265545	0.986949	1		-2.45419	2.51668e-27	8.16236e-26		-2.94232	6.11721e-17	3.97426e-16
Q13442	0	1	1		0	2	2				Q13442	-1.40659	0.777864	0.820913		-0.134915	0.982138	1		1.27167	0.637159	0.654968
Q13443	0	1	1		0	3	4				Q13443	2.01431	0.0166162	0.0236497		-3.05065	0.00366132	0.00620105		-4.18445	8.08495e-08	1.89538e-07
Q13451	1	0	1		7	0	5				Q13451	5.17337	1.39586e-16	1.41965e-15		2.4828	1.06089e-07	4.34806e-07		-2.28005	4.77005e-06	8.78312e-06
Q13459	0	0	1		0	0	7				Q13459	-0.0361187	0.998444	1		-7.73129	1.82535e-10	1.17847e-09		-4.12319	1.71465e-14	8.83936e-14
Q13464	1	1	1		9	6	8				Q13464	4.54016	3.37839e-13	2.32702e-12		0.374478	0.324338	0.378456		-3.09666	2.76563e-12	1.10921e-11
Q13492	1	0	0		2	0	0				Q13492	3.47002	1.14705e-05	2.86172e-05		1.1959	0.048755	0.065905		-2.27412	4.28249e-05	6.84766e-05
Q13496	1	0	1		3	0	3				Q13496	5.75521	3.67052e-05	8.30706e-05		0.642416	0.0284998	0.0403404		-5.12996	0.000210403	0.000302919
Q13501	1	1	1		4	4	5				Q13501	1.26891	0.00213434	0.00353777		-2.29158	0.371535	0.42831		-3.11787	8.7182e-12	3.31582e-11
Q13509	1	1	1		8	6	8				Q13509	4.16812	8.59199e-12	5.17403e-11		0.808051	0.00511678	0.00842703		-4.18044	8.76767e-10	2.64766e-09
Q13510	1	1	1		2	3	2				Q13510	2.48605	0.00022553	0.000441227		-0.696667	0.448316	0.50759		-1.41903	0.00483829	0.00584597
Q13523	1	0	1		3	0	5				Q13523	4.49599	8.71973e-05	0.000182781		-1.46154	1.08721e-06	3.80992e-06		-6.21084	1.16035e-09	3.45589e-09
Q13526	1	1	1		5	4	5				Q13526	2.30924	1.2673e-06	3.70213e-06		-0.155297	0.94582	0.981565		-2.55538	4.38281e-05	6.9945e-05
Q13535	0	0	1		0	0	11				Q13535	3.22868	2.07472e-06	5.83726e-06		-3.63861	3.40464e-06	1.09389e-05		-5.5712	2.91271e-15	1.65482e-14
Q13547	1	1	1		5	5	5				Q13547	1.83721	9.19291e-06	2.32162e-05		-1.09331	3.39874e-06	1.09285e-05		-2.97294	1.3004e-09	3.83694e-09
Q13554	1	1	1		8	3	5				Q13554	3.59039	3.31776e-14	2.6433e-13		1.52977	0.00298598	0.00517211		-2.24832	9.62532e-06	1.69141e-05
Q13557	1	1	1		6	5	6				Q13557	3.11791	1.84093e-10	9.51417e-10		1.10902	1.65926e-06	5.63902e-06		-2.36152	3.943e-07	8.36746e-07
Q13561	1	1	1		9	8	12				Q13561	4.77904	2.26381e-21	3.53206e-20		1.68686	2.06701e-11	1.50424e-10		-3.22412	2.84858e-16	1.7644e-15
Q13564	1	1	1		8	3	9				Q13564	5.41464	6.86569e-17	7.26986e-16		1.25558	1.88343e-06	6.35368e-06		-6.07961	1.57349e-11	5.82842e-11
Q13573	0	0	1		0	0	3				Q13573	5.06085	0.00461929	0.0072263		-1.30602	0.0265636	0.0379914		-5.62324	1.03989e-06	2.08333e-06
Q13576	1	0	0		2	0	0				Q13576	6.18022	3.48593e-08	1.31009e-07		2.61085	0.337394	0.392467		-3.56937	0.081548	0.0886972
Q13595	0	1	1		0	2	3				Q13595	-0.310129	0.521611	0.576783		-3.5583	3.32162e-05	8.77598e-05		-3.85574	6.63899e-08	1.58344e-07
Q13596	1	1	1		8	11	13				Q13596	1.92794	1.19299e-13	8.80629e-13		-1.09291	2.64966e-09	1.41007e-08		-2.61737	3.01356e-21	2.92067e-20
Q13610	1	0	1		2	0	3				Q13610	3.2106	4.51865e-05	0.00010012		-1.61548	0.0018022	0.00324443		-4.36884	2.44473e-06	4.64691e-06
Q13616	1	1	1		7	3	7				Q13616	4.6513	1.04507e-16	1.08703e-15		1.44098	2.14021e-09	1.16146e-08		-3.4999	4.6334e-14	2.26393e-13
Q13617	1	1	1		13	6	13				Q13617	5.17825	7.0728e-27	1.7137e-25		2.10195	6.33413e-14	6.37904e-13		-3.08543	2.2734e-14	1.14476e-13
Q13618	1	1	1		19	6	17				Q13618	5.35608	2.05612e-33	7.76987e-32		2.22594	2.82203e-16	3.84899e-15		-2.67578	1.83108e-18	1.36634e-17
Q13619	0	1	1		0	2	4				Q13619	3.2194	0.0564154	0.0735365		-3.31068	0.00309154	0.00533699		-5.80682	3.69062e-08	9.14112e-08
Q13620	1	1	1		47	20	44				Q13620	6.85078	2.64028e-94	1.55361e-91		3.2368	1.22968e-74	3.89618e-72		-3.84175	6.04565e-55	5.53379e-53
Q13630	0	0	1		0	0	6				Q13630	2.14859	1.98285e-06	5.60175e-06		-2.52066	5.8069e-08	2.50195e-07		-5.59101	4.48882e-16	2.72304e-15
Q13637	0	1	1		0	4	4				Q13637	-0.954778	0.0394171	0.0525774		-3.6294	3.40742e-07	1.30317e-06		-2.93358	5.90934e-08	1.4201e-07
Q13641	0	0	1		0	0	2				Q13641	-0.562596	0.675653	0.726257		-3.72752	0.0013452	0.00249702		-3.16493	8.56081e-06	1.51926e-05
Q13642	1	1	1		2	2	2				Q13642	1.67222	0.00421736	0.00665312		-1.00541	0.000425206	0.00088322		-2.67763	5.16951e-06	9.45525e-06
Q13683	1	1	1		5	9	12				Q13683	0.956274	0.012143	0.0176989		-3.06578	1.31352e-10	8.64278e-10		-4.02923	2.88025e-16	1.78134e-15
Q13685	1	0	1		2	0	3				Q13685	5.59328	6.03924e-05	0.000130103		-0.634311	0.00386725	0.00652568		-5.60803	2.43956e-05	4.07154e-05
Q13724	0	0	1		0	0	3				Q13724	2.85198	6.42693e-05	0.000137591		-0.0395905	0.993103	1		-2.89157	1.0338e-07	2.37888e-07
Q13740	1	1	1		7	9	11				Q13740	-0.700959	0.961476	0.984909		-2.93102	3.48822e-15	4.11689e-14		-2.57079	2.06457e-09	5.92609e-09
Q13769	0	1	1		0	3	4				Q13769	0.763096	0.103854	0.128461		-1.31672	0.00320833	0.00551779		-2.65074	2.70724e-05	4.48197e-05
Q13813	1	1	1		73	67	80				Q13813	1.85089	2.51151e-50	3.33707e-48		-0.177191	0.987418	1		-1.8868	2.85041e-68	5.33675e-66
Q13825	1	0	1		5	0	4				Q13825	11.8598	8.26054e-14	6.26614e-13		4.98191	5.32714e-11	3.69402e-10		-6.39766	0.000986337	0.00128975
Q13835	0	1	1		0	9	8				Q13835	-1.94314	0.000302044	0.000578929		-0.539476	0.854703	0.900389		1.23857	0.0442547	0.0490673
Q13838	1	1	1		4	4	3				Q13838	2.60343	8.86725e-05	0.00018559		0.492625	0.0693523	0.0913534		-2.11081	0.000238556	0.000340949
Q13867	0	1	1		0	2	2				Q13867	-2.81868	0.00670723	0.0102133		-0.885662	0.153068	0.189335		1.93302	0.228985	0.242903
Q13868	0	1	1		0	4	5				Q13868	1.697	0.0103875	0.0153081		-1.64728	0.00284395	0.00495526		-3.34428	2.59728e-08	6.55125e-08
Q13884	1	0	0		4	0	0				Q13884	7.20352	4.04254e-07	1.2868e-06		2.99311	3.71766e-05	9.74732e-05		-4.54169	0.000164901	0.000241288
Q13885	1	1	1		6	4	6				Q13885	4.07203	5.64808e-11	3.09368e-10		2.30425	0.00219474	0.00388656		-2.10272	3.19597e-05	5.22388e-05
Q13895	1	1	1		3	3	4				Q13895	1.46148	0.000689882	0.00124962		-1.80167	0.000250022	0.000544889		-2.40227	1.32336e-08	3.4675e-08
Q13907	1	1	1		2	2	2				Q13907	3.41443	2.33231e-05	5.50131e-05		0.827359	0.0100792	0.0155977		-2.58707	0.000149038	0.000219481
Q14004	0	0	1		0	0	3				Q14004	2.9351	0.138899	0.16852		-3.99657	1.36506e-05	3.89924e-05		-6.718	7.36167e-05	0.000113952
Q14008	1	1	1		22	15	25				Q14008	4.20955	6.39601e-33	2.37344e-31		-0.347913	0.266429	0.315986		-4.10616	1.78292e-35	5.32164e-34
Q14012	1	0	1		2	0	2				Q14012	5.14323	0.00344151	0.00551364		1.43332	0.0274568	0.0390655		-3.70991	0.0858426	0.0931469
Q14019	0	1	1		0	4	6				Q14019	0.702629	0.918653	0.949306		-4.90127	3.42827e-08	1.52825e-07		-3.57125	2.32726e-11	8.42352e-11
Q14103	1	1	1		11	10	12				Q14103	3.42438	1.29195e-14	1.08603e-13		-1.25092	1.9008e-08	8.80698e-08		-5.7387	1.07446e-19	9.05048e-19
Q14108	0	1	1		0	7	7				Q14108	-0.462472	0.268609	0.312454		-3.61389	4.4094e-12	3.53353e-11		-3.74686	2.51495e-12	1.01361e-11
Q14112	0	1	0		0	3	0				Q14112	-0.170549	0.727946	0.774383		-0.0268188	0.98516	1		0.521303	0.159062	0.170264
Q14118	1	0	1		2	0	2				Q14118	1.54122	0.0629385	0.0812677		-0.567564	0.0231478	0.0335017		-2.10879	0.00290199	0.00358958
Q14123	0	1	1		0	3	5				Q14123	-0.221106	0.830568	0.868523		-3.09626	0.000579196	0.00116319		-2.14302	9.55315e-07	1.92324e-06
Q14126	0	1	1		0	13	14				Q14126	-0.787467	0.29483	0.340074		-2.71798	6.05913e-12	4.74478e-11		-2.57716	1.75731e-19	1.43618e-18
Q14139	1	0	1		3	0	3				Q14139	5.62628	5.37819e-05	0.000117459		0.0535702	0.984882	1		-5.57271	3.34414e-05	5.44877e-05
Q14141	1	1	1		5	3	6				Q14141	5.26161	6.34584e-16	6.12143e-15		2.59086	5.05078e-13	4.58242e-12		-2.88009	2.74281e-12	1.10113e-11
Q14146	0	0	1		0	0	4				Q14146	0.655912	0.642063	0.693589		-3.9394	4.16645e-05	0.000108343		-4.30459	7.1192e-08	1.68432e-07
Q14151	0	0	1		0	0	3				Q14151	4.99169	0.0448586	0.0592981		-3.72738	0.0110506	0.0169842		-8.71907	3.33357e-05	5.43586e-05
Q14152	1	1	1		34	28	36				Q14152	2.85633	1.11244e-38	5.65694e-37		-0.279437	0.300999	0.353526		-3.15137	1.79977e-47	1.17671e-45
Q14156	1	0	1		2	0	5				Q14156	1.93245	0.0202156	0.0282744		-1.08708	0.298936	0.351303		-2.76808	0.0130057	0.0150225
Q14157	1	0	1		3	0	4				Q14157	4.03117	0.000611288	0.00111559		-1.24261	0.0012608	0.00235201		-5.95652	2.38701e-05	3.99192e-05
Q14160	1	1	1		7	6	10				Q14160	1.4111	0.00451687	0.0070889		-2.26888	3.20867e-11	2.29453e-10		-3.5237	3.22206e-15	1.81555e-14
Q14165	1	0	1		3	0	2				Q14165	5.56548	1.82408e-09	8.22932e-09		1.27891	1.27441e-05	3.65042e-05		-4.28657	9.85442e-08	2.27908e-07
Q14166	1	1	1		8	8	13				Q14166	2.03551	1.37364e-07	4.71501e-07		-2.42254	7.25982e-11	4.93452e-10		-4.15971	1.76411e-21	1.73836e-20
Q14168	1	0	1		8	0	6				Q14168	7.59083	2.14512e-09	9.56249e-09		2.56114	3.01593e-06	9.7816e-06		-2.52829	0.00102523	0.00133722
Q14185	1	1	1		8	8	14				Q14185	3.65881	2.69325e-11	1.53489e-10		-1.49817	4.22012e-11	2.96127e-10		-6.39045	4.47674e-19	3.52575e-18
Q14194	1	1	1		14	5	10				Q14194	7.25171	4.22842e-28	1.12367e-26		4.30433	1.25822e-27	4.21351e-26		-2.72542	4.31675e-14	2.11423e-13
Q14195	1	1	1		16	7	7				Q14195	7.99749	4.95006e-38	2.39874e-36		6.47437	1.1798e-29	4.81149e-28		-2.10199	5.15407e-07	1.07383e-06
Q14203	1	1	1		25	23	28				Q14203	3.4062	3.2005e-42	2.27291e-40		0.632829	0.00175085	0.00316722		-2.7232	4.27266e-36	1.41928e-34
Q14204	1	1	1		181	138	186				Q14204	4.11254	1.41783e-281	5.84003e-278		-0.0575072	1	1		-4.0286	1.29527e-297	5.33523e-294
Q14232	0	1	1		0	3	4				Q14232	0.490962	0.187824	0.223404		-1.99964	0.00112983	0.00212404		-2.6543	3.16331e-07	6.82936e-07
Q14240	1	1	1		12	5	11				Q14240	6.31704	2.63205e-22	4.40709e-21		2.73458	3.65698e-21	8.14221e-20		-3.57471	6.67345e-18	4.7393e-17
Q14241	0	0	1		0	0	3				Q14241	3.06463	0.00105524	0.00185512		-5.08096	5.40198e-07	1.9849e-06		-6.33795	1.33322e-08	3.49112e-08
Q14247	1	1	1		3	5	6				Q14247	0.516488	0.0316804	0.0429107		-1.24537	8.75631e-06	2.57621e-05		-1.81223	2.62771e-07	5.74193e-07
Q14254	1	1	1		20	18	20				Q14254	1.04006	1.53018e-06	4.42304e-06		-1.41779	4.31659e-17	6.60968e-16		-2.4606	2.84194e-23	3.19834e-22
Q14258	1	1	1		3	6	12				Q14258	2.86262	0.000118303	0.000242549		-3.37032	5.61744e-21	1.23734e-19		-4.65087	6.63528e-20	5.72971e-19
Q14315	1	1	1		42	47	54				Q14315	0.234835	0.993667	1		-2.66441	8.20232e-70	2.11158e-67		-2.89515	1.77595e-69	3.48339e-67
Q14320	0	1	1		0	3	2				Q14320	-0.896305	0.0668453	0.0858814		-1.94757	2.61602e-05	7.03814e-05		-1.05127	0.00153011	0.00194915
Q14331	0	0	1		0	0	2				Q14331	4.26586	0.00221453	0.00366478		-2.85238	7.26286e-06	2.1678e-05		-7.11824	2.60346e-07	5.69499e-07
Q14332	0	1	1		0	2	2				Q14332	-2.32804	0.446554	0.499418		-5.56416	0.0053629	0.00875884		-3.23611	1.03293e-05	1.80587e-05
Q14344	1	1	1		5	5	7				Q14344	3.04545	2.19338e-07	7.2859e-07		-1.24795	7.79719e-05	0.000189815		-3.2822	1.58504e-10	5.20637e-10
Q14376	1	1	1		6	3	7				Q14376	8.86711	5.65504e-18	6.63621e-17		3.27426	8.93785e-16	1.12464e-14		-4.38638	2.13429e-14	1.07735e-13
Q14444	1	1	1		9	7	11				Q14444	0.767607	0.00386999	0.00613804		-2.65963	7.81123e-16	9.93039e-15		-3.40857	5.11467e-22	5.28003e-21
Q14498	1	1	1		10	9	13				Q14498	0.995799	0.00116505	0.00202911		-3.10993	2.66392e-20	5.40527e-19		-4.01059	6.74575e-25	8.76522e-24
Q14512	0	0	1		0	0	3				Q14512	2.05437	0.0227347	0.031477		-3.19382	4.41955e-05	0.000113563		-6.38355	8.00331e-07	1.63682e-06
Q14533	1	0	0		2	0	0				Q14533	-0.212541	0.780108	0.822232		0.248789	0.0010577	0.00200307		0.46133	0.96993	0.975615
Q14558	1	1	1		8	4	8				Q14558	3.93835	1.32585e-13	9.76956e-13		0.519925	0.0446646	0.0607174		-4.34164	5.09036e-14	2.48133e-13
Q14562	0	0	1		0	0	10				Q14562	3.31611	1.32735e-06	3.87482e-06		-0.898936	0.134898	0.168429		-4.22346	3.31595e-15	1.86336e-14
Q14563	0	1	1		0	6	12				Q14563	2.78246	0.00030697	0.000587823		-4.13352	4.67402e-13	4.25936e-12		-7.16974	4.08953e-22	4.25373e-21
Q14566	1	1	1		11	14	17				Q14566	-0.274321	0.991284	1		-2.91743	5.75516e-28	1.99206e-26		-2.6651	8.83751e-24	1.03414e-22
Q14574	0	1	1		0	2	2				Q14574	-1.13376	0.0468775	0.0617883		-0.113606	0.962759	0.994096		1.02016	0.397042	0.41382
Q14669	0	0	1		0	0	6				Q14669	2.7415	4.81021e-07	1.51016e-06		-2.157	3.09193e-09	1.60804e-08		-5.34948	5.56888e-13	2.40191e-12
Q14671	1	0	1		3	0	4				Q14671	3.45971	1.58364e-07	5.3909e-07		-0.871899	0.000264345	0.000572772		-6.19259	8.36051e-11	2.83899e-10
Q14677	1	0	1		4	0	4				Q14677	4.20412	6.69446e-09	2.76095e-08		0.501141	0.0682302	0.0899617		-3.11982	2.1661e-07	4.78144e-07
Q14683	1	1	1		15	14	18				Q14683	1.78959	3.56075e-10	1.77349e-09		-1.45427	6.9299e-14	6.94508e-13		-3.13185	2.90899e-24	3.53455e-23
Q14692	0	1	1		0	2	2				Q14692	0.0268186	0.915552	0.946814		-2.92042	0.00090818	0.00174071		-2.94724	4.94599e-06	9.08677e-06
Q14694	1	1	1		6	4	7				Q14694	2.87504	8.38218e-11	4.51914e-10		-0.596991	0.00309648	0.00534328		-4.29328	3.24484e-12	1.29636e-11
Q14697	1	1	1		31	29	38				Q14697	1.04252	8.31854e-05	0.000175264		-2.62997	2.06225e-33	1.14789e-31		-4.38686	2.19834e-63	3.23392e-61
Q14699	0	1	1		0	7	9				Q14699	0.135905	0.999958	1		-3.81358	4.92489e-09	2.49209e-08		-3.39414	3.67276e-16	2.25456e-15
Q14703	1	0	1		2	0	2				Q14703	3.08632	0.000948614	0.00167913		-1.86551	0.000296752	0.000638954		-4.95184	4.04891e-06	7.51576e-06
Q14738	1	0	1		7	0	7				Q14738	7.16803	2.00274e-11	1.15375e-10		-0.549958	0.00505952	0.00834609		-7.78952	8.30864e-16	4.93842e-15
Q14764	1	1	1		42	52	53				Q14764	-1.59829	6.68399e-22	1.0882e-20		-3.98536	2.19196e-76	7.52391e-74		-2.02642	2.35705e-46	1.44357e-44
Q14767	0	0	1		0	0	5				Q14767	2.72322	0.0119756	0.0174734		-3.88301	5.50397e-13	4.9608e-12		-9.05526	1.02202e-06	2.05052e-06
Q14839	1	1	1		17	18	24				Q14839	2.21235	3.64327e-12	2.28065e-11		-1.4032	9.74527e-17	1.4184e-15		-4.81582	2.90806e-23	3.26384e-22
Q14847	1	1	1		9	9	10				Q14847	2.51283	4.64605e-13	3.14754e-12		0.00290871	1	1		-2.82388	6.70522e-14	3.22273e-13
Q14894	1	0	0		3	0	0				Q14894	7.82503	1.65094e-09	7.52235e-09		6.74713	5.53439e-10	3.28475e-09		-3.76616	7.88033e-05	0.000121342
Q14914	0	1	1		0	5	6				Q14914	0.950654	0.0605109	0.0784281		-2.70068	1.16674e-08	5.59467e-08		-3.68444	2.01356e-10	6.52033e-10
Q14919	1	0	1		3	0	3				Q14919	1.63705	0.00097447	0.00172268		-1.16867	0.000998148	0.00189639		-3.28873	4.02957e-07	8.53358e-07
Q14974	1	1	1		22	18	23				Q14974	4.84033	1.17665e-43	9.50319e-42		0.875425	2.23854e-07	8.81504e-07		-4.02437	2.79266e-38	1.07505e-36
Q14980	1	1	1		6	17	25				Q14980	1.83829	1.08303e-09	5.05781e-09		-1.46746	7.75348e-05	0.000189198		-2.96567	2.89825e-32	6.86087e-31
Q14997	1	0	1		4	0	6				Q14997	2.10391	3.05575e-05	7.04738e-05		-0.979059	9.1974e-05	0.000221667		-4.65086	1.93769e-14	9.89012e-14
Q14C86	1	1	1		8	7	10				Q14C86	2.54644	8.22473e-14	6.25049e-13		-0.619793	0.680045	0.738689		-3.16867	1.58468e-19	1.30808e-18
Q14CX7	1	0	0		2	0	0				Q14CX7	1.88146	0.000615119	0.00112209		2.11383	0.495748	0.555945		0.232375	0.879028	0.890267
Q15003	0	1	1		0	2	3				Q15003	0.779639	0.0421134	0.0558664		-3.671	3.0306e-05	8.0396e-05		-3.48302	5.34047e-08	1.29017e-07
Q15005	1	0	1		4	0	4				Q15005	4.39479	2.01028e-07	6.72651e-07		0.978579	0.000615343	0.00123218		-2.78367	7.46243e-06	1.33468e-05
Q15007	1	1	1		5	6	10				Q15007	1.08413	2.44127e-06	6.77601e-06		-3.48842	1.94109e-16	2.71951e-15		-4.86135	9.44086e-22	9.5078e-21
Q15008	1	1	1		18	18	20				Q15008	2.4579	1.15668e-22	2.02739e-21		0.354613	0.202071	0.245235		-1.99007	3.2771e-17	2.16667e-16
Q15014	0	0	1		0	0	2				Q15014	2.75728	0.349196	0.397331		-2.87716	0.000157245	0.000358833		-5.63444	0.0035127	0.00430802
Q15018	1	0	1		6	0	7				Q15018	4.41654	1.14799e-13	8.48938e-13		0.558931	0.000679963	0.00134847		-3.5741	4.49357e-13	1.95656e-12
Q15019	1	1	1		18	15	18				Q15019	4.58285	3.20342e-33	1.19954e-31		0.666437	2.97163e-05	7.90196e-05		-3.92593	1.03596e-30	2.13356e-29
Q15020	1	1	1		13	6	15				Q15020	5.33682	8.27235e-28	2.15657e-26		2.45723	6.53471e-20	1.29406e-18		-4.39017	6.25433e-28	1.05149e-26
Q15021	0	1	1		0	11	15				Q15021	0.704261	0.0787504	0.0996231		-3.44268	2.97381e-13	2.7966e-12		-2.85962	1.07803e-20	1.00235e-19
Q15024	0	1	1		0	2	2				Q15024	-4.22195	0.0209623	0.0292393		-6.78457	0.00079783	0.00155747		-2.56261	8.20308e-06	1.45829e-05
Q15029	1	1	1		28	25	30				Q15029	1.04358	3.10253e-12	1.95403e-11		-1.72642	9.32609e-32	4.57312e-30		-3.14424	2.89684e-40	1.23011e-38
Q15031	1	0	1		3	0	9				Q15031	4.10815	1.53092e-09	6.99096e-09		-2.28144	9.38026e-10	5.41897e-09		-6.05425	3.07994e-15	1.74262e-14
Q15036	1	0	1		6	0	7				Q15036	4.92618	1.00095e-06	2.98545e-06		1.04477	0.276183	0.326521		-4.27218	5.20589e-06	9.50912e-06
Q15043	1	1	1		3	3	3				Q15043	0.731093	0.628479	0.680343		-2.40659	7.44673e-05	0.000182787		-4.14709	9.2533e-05	0.000140799
Q15046	1	1	1		14	17	20				Q15046	2.27747	6.32536e-18	7.3392e-17		-0.182866	0.970982	0.999869		-2.82148	4.02458e-25	5.31323e-24
Q15050	0	1	1		0	3	3				Q15050	-0.751197	0.269089	0.312748		-3.35837	4.25698e-05	0.000110211		-2.6316	5.63604e-06	1.02494e-05
Q15054	0	0	1		0	0	2				Q15054	1.69979	0.016582	0.0236091		-0.531763	0.0320397	0.044873		-2.23155	0.000205564	0.00029647
Q15056	0	1	1		0	2	2				Q15056	-0.998843	0.0682384	0.0873986		-1.86694	0.00018889	0.000422617		-0.8681	0.606369	0.62394
Q15057	1	0	1		4	0	4				Q15057	7.77363	9.04262e-09	3.67323e-08		0.152978	0.587188	0.64729		-8.01932	1.54243e-08	3.98825e-08
Q15058	0	0	1		0	0	2				Q15058	3.50807	0.0020735	0.00344803		-1.55168	0.17174	0.210975		-5.05975	0.000135203	0.000200252
Q15059	0	0	1		0	0	3				Q15059	4.54719	0.0014219	0.00243424		-2.61564	3.72804e-05	9.7621e-05		-6.87559	3.17652e-05	5.19829e-05
Q15061	0	0	1		0	0	2				Q15061	-2.25493	4.95784e-07	1.54707e-06		-5.0284	1.49219e-10	9.74062e-10		-2.77347	0.00508174	0.00612396
Q15063	1	1	1		6	6	7				Q15063	4.60286	3.17604e-11	1.79947e-10		2.48789	2.43014e-10	1.53289e-09		-2.22453	3.66572e-09	1.01677e-08
Q15075	1	1	1		17	7	11				Q15075	4.84622	3.90889e-27	9.58375e-26		2.18586	1.66703e-17	2.73565e-16		-2.75747	6.26242e-11	2.16038e-10
Q15084	1	1	1		10	12	13				Q15084	1.23573	2.59249e-05	6.05356e-05		-1.71716	2.05326e-05	5.67228e-05		-1.82623	1.35235e-12	5.5759e-12
Q15102	1	0	1		4	0	3				Q15102	6.54003	2.60718e-09	1.14978e-08		3.5785	4.88807e-06	1.52069e-05		-2.96154	1.20669e-05	2.0919e-05
Q15118	1	0	1		3	0	2				Q15118	5.07813	5.81968e-07	1.79425e-06		1.69156	0.000691416	0.00136931		-2.86644	0.000147655	0.000217834
Q15120	1	0	1		10	0	4				Q15120	8.19105	1.51862e-24	3.19144e-23		4.97395	4.0503e-12	3.27764e-11		-3.59046	5.40075e-06	9.85194e-06
Q15121	1	0	1		3	0	3				Q15121	3.90476	6.03308e-06	1.5788e-05		0.0937877	0.892227	0.935268		-4.30264	2.05616e-06	3.95578e-06
Q15124	1	0	0		14	0	0				Q15124	10.3427	1.21533e-23	2.38377e-22		5.35777	1.43895e-16	2.06517e-15		-4.01568	4.39708e-07	9.2595e-07
Q15149	1	1	1		71	112	144				Q15149	1.2883	5.30343e-29	1.517e-27		-2.29066	8.44771e-117	1.15987e-113		-3.48778	1.10928e-194	2.28456e-191
Q15172	1	0	1		5	0	5				Q15172	7.67915	2.05134e-10	1.05355e-09		1.70305	9.1264e-08	3.78567e-07		-5.97609	2.95897e-07	6.41135e-07
Q15181	1	1	1		11	6	11				Q15181	3.13028	2.9854e-18	3.56431e-17		0.818944	0.000190377	0.000425021		-2.78569	8.42727e-17	5.42374e-16
Q15185	1	1	1		4	3	4				Q15185	5.11132	4.86202e-08	1.78969e-07		-0.161634	0.831771	0.878929		-5.27295	3.90937e-08	9.63079e-08
Q15198	1	1	1		5	5	5				Q15198	-0.140766	0.945282	0.971462		-1.72731	6.56438e-05	0.000162785		-1.22441	0.000149725	0.000220413
Q15208	1	1	1		2	2	3				Q15208	1.50092	0.0727068	0.092632		-2.26138	7.98967e-07	2.85672e-06		-3.5786	1.65899e-07	3.70172e-07
Q15233	1	1	1		16	11	17				Q15233	2.07719	8.60566e-16	8.12998e-15		-1.57683	1.23704e-15	1.52556e-14		-3.92123	5.94272e-29	1.06891e-27
Q15257	1	1	1		4	3	4				Q15257	5.79483	4.61104e-12	2.85178e-11		2.41258	3.85714e-07	1.4549e-06		-3.03051	3.08932e-08	7.72142e-08
Q15269	0	1	1		0	4	4				Q15269	-2.90386	0.0672106	0.0862968		-6.45711	2.68542e-05	7.20602e-05		-3.2012	8.81442e-07	1.78499e-06
Q15286	1	1	1		5	5	5				Q15286	3.60046	1.21283e-10	6.41289e-10		0.368523	0.11903	0.149614		-3.3225	1.97949e-10	6.42516e-10
Q15287	1	1	1		4	3	5				Q15287	0.242002	0.57587	0.629179		-1.40763	1.03009e-05	2.99219e-05		-2.26382	3.18347e-05	5.20759e-05
Q15293	0	1	1		0	3	5				Q15293	1.17258	0.501985	0.557025		-4.15842	9.87285e-10	5.67173e-09		-4.45154	2.64328e-13	1.19285e-12
Q15323	0	1	1		0	8	5				Q15323	-0.791429	0.344783	0.393178		-0.713212	0.0442311	0.0601678		0.081921	0.999457	1
Q15334	1	1	1		8	5	9				Q15334	2.32374	3.21899e-11	1.8188e-10		-0.179537	0.90285	0.943867		-2.92425	4.13696e-10	1.29484e-09
Q15363	1	1	1		2	2	2				Q15363	2.77374	5.28591e-05	0.000115505		1.84286	0.000246536	0.000537861		-0.930887	0.0418855	0.0465282
Q15365	1	1	1		7	7	7				Q15365	3.75492	5.54019e-16	5.38208e-15		0.561975	0.000931695	0.00178164		-2.86741	5.23646e-14	2.54052e-13
Q15366	1	1	1		5	4	5				Q15366	2.90563	2.83988e-09	1.24441e-08		0.36508	0.0737454	0.0966149		-2.54055	1.70456e-08	4.3827e-08
Q15369	1	1	1		2	2	2				Q15369	3.81246	1.4399e-06	4.17672e-06		0.690592	0.111682	0.141326		-3.12187	9.45764e-06	1.6655e-05
Q15382	1	1	1		2	2	3				Q15382	3.3554	3.44636e-07	1.10644e-06		0.34406	0.128084	0.160358		-2.80012	1.85654e-07	4.11577e-07
Q15386	1	1	1		8	3	12				Q15386	4.34113	5.83564e-15	5.11426e-14		-0.961853	2.36525e-06	7.81271e-06		-5.00711	7.13535e-18	5.04991e-17
Q15393	1	1	1		25	27	29				Q15393	-0.200779	0.998761	1		-2.1247	1.37584e-35	8.99538e-34		-2.04768	1.45979e-26	2.12469e-25
Q15397	1	1	1		5	9	11				Q15397	1.25896	0.0517028	0.0678229		-2.61532	1.08025e-07	4.42126e-07		-3.82753	5.73527e-15	3.10428e-14
Q15404	1	1	1		2	2	2				Q15404	-0.597721	0.0536327	0.0701535		-0.309914	0.658172	0.717769		0.287807	0.005221	0.00628076
Q15417	1	1	1		7	4	8				Q15417	2.4978	1.21913e-05	3.02505e-05		-0.667385	0.00889355	0.013897		-3.21272	1.30009e-07	2.94559e-07
Q15418	1	0	1		4	0	4				Q15418	5.3148	3.87299e-07	1.23666e-06		0.190367	0.775297	0.827961		-5.12444	1.37965e-08	3.60353e-08
Q15424	0	0	1		0	0	3				Q15424	1.23157	0.09721	0.120823		-2.48484	5.85379e-05	0.000146844		-4.75457	3.75516e-07	8.00086e-07
Q15428	1	1	1		7	7	7				Q15428	1.25922	1.97334e-05	4.71516e-05		-0.509501	0.0113971	0.017458		-1.53027	2.88445e-06	5.44503e-06
Q15435	1	1	1		10	7	12				Q15435	3.90722	8.89296e-19	1.10665e-17		-0.915291	0.175077	0.214818		-4.84597	2.96968e-23	3.32394e-22
Q15436	1	1	1		11	10	12				Q15436	3.95872	1.41987e-18	1.74581e-17		-0.196669	0.929837	0.968884		-3.75284	6.3395e-19	4.93618e-18
Q15437	1	1	1		7	5	11				Q15437	4.76749	5.2203e-11	2.8785e-10		0.79667	0.000520221	0.00105921		-4.44201	2.61209e-14	1.30573e-13
Q15459	1	1	1		20	21	20				Q15459	0.376037	0.926343	0.956292		-0.81699	2.17903e-09	1.18098e-08		-1.15753	9.71e-14	4.61309e-13
Q15477	1	1	1		15	6	18				Q15477	5.86479	6.78578e-20	9.22463e-19		1.65757	4.2272e-17	6.49695e-16		-5.31755	6.42232e-20	5.56916e-19
Q15493	1	0	0		2	0	0				Q15493	4.74828	2.7415e-05	6.36182e-05		3.80657	0.000226562	0.000498508		-0.941709	0.390823	0.407442
Q15517	1	1	0		2	3	0				Q15517	-1.8645	0.00355452	0.00567703		-0.722208	0.412014	0.470367		1.14229	0.102913	0.111055
Q15528	0	1	1		0	2	2				Q15528	1.09716	0.288653	0.33351		-1.70131	0.000674102	0.00133878		-2.79847	1.38397e-05	2.38119e-05
Q15554	0	0	1		0	0	3				Q15554	3.58218	0.018498	0.0260935		-3.65638	0.000538124	0.00108974		-7.19371	2.94628e-07	6.38723e-07
Q15582	1	1	1		26	24	27				Q15582	1.86792	5.29652e-24	1.06943e-22		-2.09679	1.16209e-31	5.63135e-30		-3.8554	1.60011e-44	9.15395e-43
Q15628	0	0	1		0	0	2				Q15628	3.28219	0.00188384	0.00315942		-3.25918	0.799344	0.850115		-6.54137	1.07067e-07	2.45277e-07
Q15631	1	1	1		4	6	5				Q15631	2.53245	2.29556e-08	8.84512e-08		-0.15366	0.792471	0.844113		-2.772	1.52407e-09	4.46172e-09
Q15637	1	1	1		2	2	2				Q15637	3.45261	6.68649e-05	0.000142629		0.0929688	0.757668	0.811894		-3.35964	5.37912e-05	8.50203e-05
Q15642	1	1	1		9	13	15				Q15642	-0.406893	0.0980963	0.121851		-1.33632	5.1518e-12	4.08868e-11		-0.847335	0.000209357	0.000301623
Q15645	0	1	1		0	7	8				Q15645	0.309478	0.990902	1		-1.97335	0.00175763	0.00317529		-2.45206	2.43598e-12	9.82741e-12
Q15646	0	1	1		0	10	10				Q15646	-1.67293	0.036591	0.0491099		-5.47989	6.8404e-16	8.80487e-15		-3.82704	4.167e-16	2.53154e-15
Q15648	0	0	1		0	0	2				Q15648	3.45267	0.0491341	0.064618		-1.74904	0.000210991	0.000466741		-5.20171	2.72421e-05	4.50463e-05
Q15691	1	1	1		6	8	8				Q15691	0.825464	0.0174301	0.0247142		-2.57817	1.40957e-11	1.04802e-10		-2.72452	5.69239e-15	3.08513e-14
Q15717	1	1	1		8	8	8				Q15717	1.78836	1.70389e-07	5.77638e-07		-0.986262	3.60092e-06	1.15246e-05		-2.93722	7.88601e-13	3.32132e-12
Q15738	1	1	1		3	3	4				Q15738	0.639013	0.839262	0.876147		-2.79565	3.8004e-07	1.43482e-06		-2.87579	1.48905e-07	3.34062e-07
Q15746	1	0	1		4	0	3				Q15746	4.06825	1.75687e-07	5.94134e-07		2.30439	2.09553e-06	7.00412e-06		-1.2948	0.0472117	0.0522054
Q15750	1	0	1		2	0	3				Q15750	2.39211	0.00120963	0.00209876		0.584151	0.234589	0.281466		-1.80796	0.00786477	0.00928755
Q15758	1	1	1		9	9	10				Q15758	-0.00269247	0.999999	1		-2.33599	8.44264e-16	1.06673e-14		-2.32732	4.5809e-11	1.60448e-10
Q15773	1	1	1		2	2	2				Q15773	1.79329	0.0140298	0.0202484		-0.740855	0.0164622	0.0245236		-2.53414	0.00138924	0.00178042
Q15785	1	1	1		3	5	6				Q15785	1.68631	2.82486e-05	6.54788e-05		-1.48852	1.46339e-05	4.15418e-05		-4.12823	8.76952e-14	4.18075e-13
Q15796	1	0	1		2	0	2				Q15796	2.93989	6.84945e-05	0.000145878		-1.40593	0.00877968	0.0137295		-4.34581	1.11021e-06	2.21675e-06
Q15813	0	0	1		0	0	2				Q15813	3.08492	7.2917e-06	1.88068e-05		-1.20408	0.000934414	0.00178601		-4.28901	3.93726e-07	8.35958e-07
Q15833	1	1	1		5	6	8				Q15833	2.26655	8.10434e-06	2.07083e-05		-0.539811	0.00786834	0.0124128		-3.32551	2.26608e-13	1.03252e-12
Q15836	1	1	1		4	3	4				Q15836	3.56731	2.56456e-10	1.30574e-09		1.24615	1.25147e-05	3.5897e-05		-2.04871	5.56446e-08	1.34192e-07
Q15907	1	1	1		12	10	12				Q15907	3.41518	3.8171e-21	5.84485e-20		0.743917	1.71836e-06	5.82546e-06		-2.83162	2.42476e-16	1.50643e-15
Q15910	0	0	1		0	0	2				Q15910	3.27182	0.00182386	0.00306506		-2.69043	0.00020572	0.000456307		-5.96224	3.73378e-07	7.96306e-07
Q15942	0	1	1		0	3	5				Q15942	0.00542036	0.999978	1		-3.98076	6.33735e-13	5.63791e-12		-3.56692	4.99981e-13	2.16326e-12
Q16134	1	0	0		2	0	0				Q16134	8.04825	1.01307e-08	4.08702e-08		5.27983	3.90423e-05	0.00010204		-2.76842	0.00515584	0.00620962
Q16181	1	1	1		17	10	17				Q16181	5.76107	3.61867e-37	1.65615e-35		1.78186	2.08029e-18	3.63081e-17		-4.18255	1.26862e-29	2.43044e-28
Q16186	1	0	1		2	0	2				Q16186	5.77342	1.90167e-05	4.55141e-05		0.152105	0.819252	0.86748		-5.62132	1.52653e-06	2.9875e-06
Q16204	1	0	1		3	0	3				Q16204	1.53185	0.00987016	0.0146137		-0.0949273	0.839763	0.886237		-2.19136	0.000215567	0.000309919
Q16222	1	1	1		5	6	8				Q16222	2.13108	1.38074e-07	4.73546e-07		-1.44374	1.1071e-07	4.51499e-07		-4.1599	2.86664e-17	1.90754e-16
Q16270	0	1	1		0	4	2				Q16270	-4.2091	4.92532e-07	1.53925e-06		-0.591823	0.0264105	0.0377856		3.61728	0.000142626	0.000210715
Q16352	1	1	1		18	7	11				Q16352	7.21198	5.90596e-39	3.07932e-37		4.93626	1.08604e-23	2.9048e-22		-2.89807	2.27182e-07	5.00409e-07
Q16394	0	1	1		0	5	5				Q16394	-0.898535	0.387209	0.436962		-3.70962	7.87577e-06	2.33216e-05		-2.21622	1.37004e-06	2.7001e-06
Q16401	1	1	1		11	9	13				Q16401	5.44524	9.39115e-30	2.78366e-28		1.72454	1.96246e-18	3.45444e-17		-3.63286	7.8534e-25	1.00773e-23
Q16512	0	0	1		0	0	2				Q16512	5.2759	3.07458e-05	7.08684e-05		-0.98981	0.0452346	0.0613908		-6.26571	1.52675e-06	2.9875e-06
Q16513	1	1	1		7	2	11				Q16513	4.89661	4.94521e-08	1.81869e-07		-0.372557	0.372549	0.428999		-5.5112	5.58603e-13	2.40679e-12
Q16527	1	1	1		2	3	3				Q16527	5.45801	1.13947e-09	5.30938e-09		0.589815	0.00612405	0.00986759		-3.95381	3.72419e-09	1.03091e-08
Q16531	1	1	1		28	25	28				Q16531	3.46086	1.60793e-40	9.73981e-39		0.906856	6.53756e-09	3.24436e-08		-2.63561	1.00839e-28	1.79032e-27
Q16537	1	0	1		5	0	5				Q16537	4.51983	1.25488e-06	3.66845e-06		0.882963	0.000921513	0.00176545		-3.47631	7.49515e-07	1.53442e-06
Q16539	1	0	1		3	0	3				Q16539	6.08123	0.000456616	0.000850657		0.465366	0.436661	0.495687		-5.80924	0.00337574	0.00414817
Q16543	1	1	1		10	9	12				Q16543	2.63713	5.61822e-11	3.08142e-10		-0.429719	0.151239	0.187241		-2.63236	3.74741e-18	2.72714e-17
Q16555	1	1	1		22	17	20				Q16555	6.79538	7.12934e-45	6.52572e-43		4.04597	1.7113e-48	2.13601e-46		-2.63074	2.96237e-24	3.58882e-23
Q16563	0	1	1		0	2	2				Q16563	-1.1682	0.0659153	0.0848189		-3.66463	7.47592e-06	2.22014e-05		-2.49643	0.000277303	0.000391705
Q16576	1	1	1		8	5	8				Q16576	4.43925	1.89444e-13	1.35944e-12		0.216018	0.933181	0.972122		-3.44253	7.0276e-12	2.68273e-11
Q16610	0	1	1		0	6	3				Q16610	-3.22052	1.39544e-06	4.06206e-06		-1.29008	0.242971	0.29017		1.93044	0.00626154	0.00746708
Q16625	0	1	1		0	5	6				Q16625	0.554241	0.524027	0.578832		-3.17098	6.61184e-11	4.52395e-10		-2.92069	1.89617e-08	4.84211e-08
Q16629	1	1	1		5	5	5				Q16629	0.391991	0.510094	0.565414		-2.99671	1.86785e-10	1.20214e-09		-3.46387	2.99544e-11	1.06364e-10
Q16630	1	1	1		4	4	5				Q16630	0.982917	0.00620267	0.00949417		-1.9039	5.78565e-11	3.9985e-10		-3.01789	3.98416e-10	1.24892e-09
Q16637	0	0	1		0	0	2				Q16637	2.73893	0.233349	0.273836		-3.76713	0.000124977	0.000292157		-6.50606	2.57833e-05	4.28232e-05
Q16643	1	1	1		7	7	7				Q16643	2.34806	1.54655e-08	6.09008e-08		-0.525931	0.00136273	0.00252614		-3.07213	9.58995e-11	3.23779e-10
Q16658	1	1	1		11	12	16				Q16658	3.9007	1.26013e-18	1.55404e-17		-0.261622	0.969592	0.998809		-4.60889	9.3421e-28	1.52095e-26
Q16666	0	1	1		0	7	11				Q16666	-0.000173554	1	1		-4.43188	3.05677e-09	1.59378e-08		-4.39901	1.90188e-14	9.73149e-14
Q16698	1	1	1		3	3	6				Q16698	2.7271	1.30213e-05	3.20589e-05		-0.777581	0.947244	0.982387		-4.46774	1.83941e-11	6.75873e-11
Q16706	0	1	1		0	7	7				Q16706	-2.076	0.000940389	0.00166672		-2.23841	5.13872e-05	0.000130495		-0.727919	0.215256	0.228692
Q16740	1	0	1		4	0	4				Q16740	3.24998	8.76067e-08	3.10811e-07		1.85124	3.74859e-08	1.64962e-07		-1.27882	0.000225422	0.000323186
Q16762	1	0	1		5	0	4				Q16762	11.2375	1.81842e-10	9.42148e-10		5.08697	1.56086e-10	1.01727e-09		-6.10589	1.7892e-06	3.46322e-06
Q16777;Q6FI13	1	1	1		6	8	10				Q16777;Q6FI13	-1.80037	6.53171e-09	2.71211e-08		-5.74771	2.23212e-19	4.25654e-18		-4.03138	3.047e-17	2.02429e-16
Q16787	0	1	1		0	17	12				Q16787	-2.77673	1.22335e-11	7.19853e-11		-2.33867	4.19831e-05	0.000109022		0.577205	0.0230714	0.0261218
Q16799	1	0	0		2	0	0				Q16799	7.98823	1.9777e-05	4.7224e-05		5.64799	0.00365765	0.0061974		-2.34024	0.418503	0.435527
Q16822	1	0	1		8	0	14				Q16822	4.19897	3.05483e-13	2.11476e-12		-0.384564	0.947438	0.982387		-5.88792	1.35266e-18	1.02797e-17
Q16831	0	0	1		0	0	3				Q16831	1.99204	0.015011	0.0215587		-4.00407	3.89698e-06	1.24143e-05		-4.17356	5.97071e-06	1.08341e-05
Q16836	1	0	1		3	0	7				Q16836	3.52006	3.94705e-06	1.06539e-05		-3.63547	1.02039e-06	3.59846e-06		-5.50836	1.44414e-11	5.36862e-11
Q16849	1	0	0		4	0	0				Q16849	7.39018	8.0596e-10	3.87369e-09		3.40106	5.71061e-06	1.74625e-05		-3.4925	0.000114069	0.000171604
Q16851	1	1	1		8	9	10				Q16851	2.40583	2.96924e-15	2.68209e-14		-0.0202647	0.999977	1		-2.69599	2.32198e-14	1.16684e-13
Q16877	1	0	0		4	0	0				Q16877	3.92343	1.56323e-06	4.51221e-06		3.66185	4.64488e-05	0.000118982		-1.79937	0.0349942	0.0390732
Q16881	1	1	1		4	2	7				Q16881	5.58812	9.48638e-10	4.49658e-09		-1.08478	0.0730477	0.0957618		-5.64796	1.08885e-10	3.64633e-10
Q16891	0	1	1		0	2	7				Q16891	3.09974	3.08276e-05	7.09378e-05		-3.10885	2.86711e-09	1.51018e-08		-4.29868	4.16109e-13	1.81948e-12
Q1KMD3	1	1	1		11	14	17				Q1KMD3	1.01515	4.21494e-07	1.33755e-06		-2.06083	9.04691e-22	2.0818e-20		-3.64399	1.37376e-26	2.00656e-25
Q29983	0	0	1		0	0	2				Q29983	1.80463	0.116201	0.142832		-0.905032	0.445618	0.504675		-2.70967	0.000528883	0.000716602
Q29RF7	1	1	1		5	3	7				Q29RF7	0.940343	0.00275577	0.00448657		-1.92519	1.54154e-07	6.20078e-07		-3.99972	2.65151e-12	1.06552e-11
Q2M2I5	1	1	1		2	2	2				Q2M2I5	-2.51929	0.00102504	0.0018051		-0.854856	0.234255	0.281147		1.66443	0.0107563	0.0125298
Q2M2I8	1	0	1		10	0	9				Q2M2I8	5.66948	1.88568e-20	2.71577e-19		2.92491	2.89463e-14	3.06504e-13		-2.65228	1.76721e-08	4.53529e-08
Q2M389	1	1	1		7	2	7				Q2M389	6.65323	2.79057e-13	1.9449e-12		1.76666	8.66088e-10	5.01747e-09		-4.40409	2.30181e-07	5.06742e-07
Q2NKQ1	1	0	0		3	0	0				Q2NKQ1	6.32872	2.72333e-07	8.88153e-07		6.19024	0.000415789	0.000866626		-3.34259	0.00688898	0.00818678
Q2NKX8	0	0	1		0	0	2				Q2NKX8	-0.573426	0.0305244	0.0414813		-3.138	0.411913	0.470367		-2.56457	6.85822e-05	0.000106721
Q2NL82	1	1	1		3	6	9				Q2NL82	0.630158	0.588148	0.640725		-3.96271	6.66978e-09	3.306e-08		-3.44533	1.87935e-11	6.89317e-11
Q2TAL8	1	0	1		3	0	4				Q2TAL8	5.73727	9.87615e-08	3.45917e-07		-0.0259876	0.998019	1		-5.95645	5.43653e-06	9.90405e-06
Q2TAY7	1	1	1		10	6	10				Q2TAY7	3.23328	9.02619e-14	6.79687e-13		-0.361638	0.193695	0.235905		-3.70344	2.06192e-14	1.04384e-13
Q2VIR3	1	1	1		14	9	14				Q2VIR3	3.17599	1.46056e-17	1.63036e-16		-0.964633	1.15461e-07	4.69018e-07		-4.20884	1.63341e-23	1.8689e-22
Q32P28	1	1	1		4	6	8				Q32P28	2.38546	0.000391569	0.000733792		-1.40102	9.5725e-05	0.000229506		-3.29555	4.11983e-13	1.80336e-12
Q32P41	1	0	0		2	0	0				Q32P41	6.471	2.58666e-06	7.14585e-06		0.792829	0.00274693	0.00479636		-5.67817	3.47698e-05	5.65626e-05
Q32P44	1	0	1		3	0	4				Q32P44	3.26515	0.000212242	0.000416892		-1.11327	0.0815029	0.105747		-5.53936	3.44999e-06	6.45053e-06
Q3KQU3	0	1	1		0	6	12				Q3KQU3	0.950229	0.00861051	0.0128923		-2.8576	7.28286e-14	7.28109e-13		-4.44275	2.68118e-21	2.61701e-20
Q3LXA3	1	0	0		6	0	0				Q3LXA3	7.71738	5.87928e-15	5.14156e-14		5.79487	3.66918e-14	3.80689e-13		-2.13742	0.00121884	0.00157527
Q3SY69	1	0	0		4	0	0				Q3SY69	5.58096	5.94723e-09	2.4895e-08		1.18407	0.0074767	0.0118403		-4.55466	2.89356e-05	4.76743e-05
Q3SY84	1	1	1		5	6	7				Q3SY84	-0.608761	0.896163	0.928628		-1.20877	0.579531	0.639798		-0.52279	0.895421	0.905979
Q3V6T2	0	0	1		0	0	7				Q3V6T2	1.67148	0.00285665	0.00464164		-3.51549	3.44701e-08	1.53328e-07		-4.70016	2.49794e-13	1.1319e-12
Q4G0F5	1	1	1		3	2	2				Q4G0F5	4.65541	5.04249e-08	1.85116e-07		2.22891	6.96491e-06	2.08795e-05		-3.03751	0.00413471	0.00503425
Q4G0J3	0	1	1		0	3	7				Q4G0J3	1.8866	1.61947e-05	3.94244e-05		-3.00501	7.83708e-10	4.5659e-09		-7.48071	9.82737e-16	5.78271e-15
Q4G0N4	1	0	1		8	0	10				Q4G0N4	6.30762	6.2508e-12	3.80873e-11		1.05338	3.1874e-08	1.42705e-07		-6.37124	1.49575e-15	8.72665e-15
Q4J6C6	1	0	0		3	0	0				Q4J6C6	5.50018	3.00457e-06	8.25605e-06		0.820782	0.157502	0.194528		-4.6794	0.0103445	0.0120603
Q4KMP7	1	1	1		4	3	6				Q4KMP7	2.17227	0.00010443	0.000215612		-2.12383	4.54543e-08	1.98543e-07		-4.67914	3.03618e-11	1.07718e-10
Q4KMQ2	1	1	1		3	6	8				Q4KMQ2	0.696603	0.950819	0.976024		-2.20783	7.95485e-07	2.84843e-06		-2.64108	2.14794e-12	8.6824e-12
Q4LDE5	1	1	0		3	3	0				Q4LDE5	0.325721	0.5806	0.633507		2.90728	0.00737951	0.0117044		1.1402	0.713673	0.729977
Q52LJ0	1	1	1		2	2	5				Q52LJ0	2.77508	6.94737e-07	2.11972e-06		-1.58866	0.000268274	0.000580367		-4.15299	1.45804e-05	2.50131e-05
Q53EL6	1	1	1		5	3	7				Q53EL6	5.01947	8.06458e-07	2.43713e-06		1.32406	0.000875878	0.00168744		-5.23314	4.29474e-08	1.05298e-07
Q53EZ4	1	1	1		3	5	7				Q53EZ4	0.650894	0.325559	0.373012		-3.37641	2.85414e-09	1.50527e-08		-5.47846	2.3452e-11	8.48103e-11
Q53F19	0	0	1		0	0	3				Q53F19	1.08678	0.0769992	0.0976477		-4.14456	4.15206e-07	1.54913e-06		-5.41937	7.77461e-09	2.08081e-08
Q53GS9	1	1	1		7	7	7				Q53GS9	1.74976	2.41366e-05	5.67135e-05		-0.8141	0.000439589	0.00091034		-2.41199	2.16456e-09	6.18724e-09
Q53H96	0	0	1		0	0	3				Q53H96	3.3173	0.156623	0.188745		-0.590245	0.962586	0.994096		-3.90754	0.232703	0.246697
Q53HC9	0	0	1		0	0	2				Q53HC9	4.05726	1.70312e-05	4.12655e-05		0.545599	0.0163422	0.02438		-3.51166	5.45085e-06	9.92576e-06
Q53HL2	0	1	1		0	4	5				Q53HL2	1.57209	0.00837914	0.0125596		-3.07807	5.20008e-05	0.000131648		-4.33199	5.0251e-10	1.56214e-09
Q53TN4	0	1	1		0	3	3				Q53TN4	-1.57812	0.00937726	0.013934		-4.06934	1.59505e-07	6.39105e-07		-2.57608	4.34603e-05	6.94118e-05
Q562R1	1	1	1		3	3	3				Q562R1	2.4146	0.00274382	0.00447065		-1.87956	0.0312844	0.0439347		-4.31541	2.02021e-09	5.81498e-09
Q567U6	1	0	1		8	0	10				Q567U6	4.6162	5.81497e-12	3.54842e-11		0.695559	0.000882993	0.00169797		-3.86767	5.11691e-14	2.49132e-13
Q58FG1	1	0	1		2	0	2				Q58FG1	1.66858	0.0021521	0.00356433		-0.195897	0.822238	0.870195		-1.86448	0.000906613	0.00119194
Q59EK9	1	0	0		3	0	0				Q59EK9	9.26075	1.05792e-05	2.65221e-05		4.00909	0.00574008	0.00931209		-5.13971	0.013388	0.0154555
Q5BKZ1	1	1	1		5	4	6				Q5BKZ1	1.70663	0.000399589	0.000748066		-2.1966	1.12076e-12	9.6578e-12		-3.74501	2.48104e-11	8.93304e-11
Q5D862	1	1	1		8	10	9				Q5D862	-1.48008	7.0999e-06	1.83466e-05		-0.149144	0.999095	1		1.87083	0.00335178	0.00411996
Q5F1R6	0	0	1		0	0	3				Q5F1R6	3.4413	0.0109973	0.0161203		-4.62829	0.00169293	0.00307459		-8.0696	4.69017e-07	9.84146e-07
Q5GLZ8	1	0	1		8	0	8				Q5GLZ8	4.35905	5.34578e-14	4.15458e-13		0.501481	0.120841	0.151705		-3.97032	2.3798e-15	1.35767e-14
Q5H9R7	0	1	1		0	2	2				Q5H9R7	-1.39341	0.253961	0.296504		-3.77718	0.000135759	0.000314682		-2.38377	1.28815e-05	2.22749e-05
Q5HYI8	1	0	1		2	0	2				Q5HYI8	12.6089	5.28225e-11	2.90488e-10		0.225163	0.842207	0.888589		-12.3837	9.66988e-11	3.2621e-10
Q5HYK3	1	0	0		2	0	0				Q5HYK3	5.69272	1.72855e-06	4.93751e-06		0.908444	0.0215791	0.0314746		-4.78428	1.95905e-06	3.776e-06
Q5JPH6	0	0	1		0	0	4				Q5JPH6	1.21131	0.0811217	0.102277		-3.25135	0.000456509	0.000942537		-3.5333	8.43764e-06	1.49804e-05
Q5JRX3	1	0	1		3	0	8				Q5JRX3	3.85601	6.6725e-07	2.04039e-06		-2.26572	0.000312484	0.000668983		-8.69986	5.63544e-15	3.05829e-14
Q5JSH3	1	1	1		11	6	12				Q5JSH3	4.69489	1.05753e-25	2.44718e-24		0.968707	7.48282e-07	2.69421e-06		-4.66952	4.42528e-21	4.24889e-20
Q5JSL3	1	0	1		3	0	6				Q5JSL3	2.68753	9.61e-05	0.000199917		-1.85023	3.41415e-07	1.30453e-06		-6.80359	1.49525e-12	6.11612e-12
Q5JTH9	0	1	1		0	3	7				Q5JTH9	1.26634	0.120436	0.1476		-4.44185	1.08846e-07	4.44339e-07		-8.36902	1.88408e-12	7.6308e-12
Q5JTV8	0	1	1		0	2	2				Q5JTV8	1.17518	0.195409	0.23209		-1.88849	0.000358662	0.000758381		-3.06368	2.12282e-05	3.56894e-05
Q5JTZ9	0	0	1		0	0	3				Q5JTZ9	0.366548	0.648805	0.700321		-1.0118	0.0127312	0.0193505		-2.85766	0.000295999	0.000416971
Q5JVF3	1	1	1		2	2	4				Q5JVF3	5.25487	1.68195e-08	6.57925e-08		-1.0222	0.56389	0.624371		-5.16242	1.37077e-09	4.033e-09
[truncated: 1,260 more rows]

## Sheet: exosome marker proteins
													Comparisons proteins found in pelleted vesicle material of S9 cell supernatants
													Additionally, the p.fdr (FalseDiscovery Rate p-value), an adjusted p-value, is listed (significant differences: p.fdr. ≤ 0.05)
exosome marker				Presence of the detected proteins in the individual samples (binary)				Number of peptides found from each detected proteins
Category	SwissProt #	Protein Description		90_min_rHla	8h	48h		90_min_rHla	8h	48h			SwissProt #	90_min/8h|signal_log2_ratio	90_min/8h|raw_p_value	90_min/8h|adjusted_p_value		90_min/48h|signal_log2_ratio	90_min/48h|raw_p_value	90_min/48h|adjusted_p_value		8h/48h|signal_log2_ratio	8h/48h|raw_p_value	8h/48h|adjusted_p_value
ESCRT	Q99816	Tumor susceptibility gene 101 protein, TSG101		1	1	1		8	7	10			Q99816	1.20603	0.00155042	0.00264219		-1.82863	6.30889e-11	4.33829e-10		-2.89681	3.67991e-16	2.25559e-15
	Q9H9H4	Vacuolar protein sorting-associated protein 37B, VPS37B		1	1	1		4	4	4			Q9H9H4	1.23132	0.00707117	0.0107318		-1.74016	5.53763e-06	1.69766e-05		-3.18325	1.11032e-07	2.53796e-07
	A5D8V6	Vacuolar protein sorting-associated protein 37C, VPS37C		0	0	1		0	0	2			A5D8V6	0.410081	0.685383	0.734225		-3.13476	0.00013149	0.000305993		-3.54484	0.00017359	0.000253014
	O43633	Charged multivesicular body protein 2a, CHMP2A		1	1	1		4	4	5			O43633	-0.0404311	0.998629	1		-2.01705	6.35109e-08	2.71371e-07		-2.18696	2.22237e-06	4.24776e-06
ESCRT-associated	Q8WUM4	Programmed cell death 6 interacting protein, PDCD6IP/Alix		1	1	1		34	31	35			Q8WUM4	2.84907	4.51925e-48	5.31851e-46		-0.714225	1.25048e-14	1.41116e-13		-3.60463	3.29952e-58	3.5765e-56
Tetraspanin	P08962	CD63 antigen, CD63		0	1	1		0	3	3			P08962	-1.33102	0.102207	0.126537		-1.9852	0.0100387	0.015545		-0.654183	0.12064	0.129641
	P21926	CD9 antigen, CD9		1	1	1		5	6	6			P21926	-1.30394	7.61078e-06	1.95808e-05		-4.03936	3.18691e-14	3.3317e-13		-2.59249	1.88823e-09	5.45414e-09
	P27701	CD82 antigen, CD82		1	1	1		2	4	4			P27701	-0.551963	0.311389	0.357872		-3.29784	2.86496e-07	1.10082e-06		-2.67575	3.39492e-07	7.30217e-07
	P48509	CD151 antigen, CD151		1	1	1		2	3	4			P48509	-0.109105	0.92658	0.956297		-3.54261	8.86274e-08	3.68371e-07		-3.14422	5.69321e-09	1.5489e-08
	O43657	Tetraspanin-6, TSPNA6		0	0	1		0	0	2			O43657	0.559437	0.834902	0.872612		-1.43417	0.00441947	0.00737592		-1.9936	0.0016444	0.00208923
RNA binding protein, ribosomal protein	P26373	60S ribosomal protein L13, RPL13		1	1	1		9	10	10			P26373	0.502753	0.277736	0.321799		-3.70322	2.01603e-13	1.93117e-12		-3.41045	6.85838e-19	5.31009e-18
	P61254	60S ribosomal protein L26, RPL26		0	0	1		0	0	2			P61254	4.95617	4.39834e-07	1.39146e-06		-1.82983	0.000722204	0.00142469		-6.786	4.42701e-08	1.0809e-07
	P62851	40S ribosomal protein S25, RPS25		1	1	1		6	6	7			P62851	0.638058	0.0377949	0.0505774		-2.90051	2.04411e-14	2.23928e-13		-3.7684	2.80822e-14	1.40207e-13
cargo selection	P46934	E3 ubiquitin-protein ligase NEDD4, NEDD4		0	0	1		0	0	2			P46934	1.76466	0.0205347	0.0286915		-1.11377	0.0222989	0.0324098		-2.87843	5.40827e-05	8.53184e-05
	Q96PU5	E3 ubiquitin-protein ligase NEDD4-like, NEDD4L		1	1	1		5	5	7			Q96PU5	1.36712	0.0301388	0.0409979		-1.83918	0.000141009	0.000325936		-2.78185	2.5159e-09	7.12232e-09
protein trafficking, protein sorting	O00560	Syntenin-1, Syndecan-binding protein 1, SDCBP		1	1	1		10	10	10			O00560	1.20432	0.00236126	0.00389353		-2.84929	1.73853e-17	2.83044e-16		-3.74067	1.30463e-16	8.26737e-16
	Q8N5I2	Arrestin domain-containing protein 1, ARRDC1		1	1	1		2	3	4			Q8N5I2	0.533127	0.315646	0.36236		-3.80365	4.99322e-06	1.54872e-05		-3.27022	9.51953e-08	2.20782e-07
	Q9H0U4	Ras-related protein Rab-1B, Rab1B		1	1	1		12	11	11			Q9H0U4	4.83769	4.40807e-22	7.23379e-21		1.81104	3.28902e-15	3.89295e-14		-2.98136	5.48537e-15	2.99261e-14
	P20339	Ras-related protein Rab-5A, Rab5A		1	1	1		8	8	9			P20339	3.53262	3.11547e-18	3.70886e-17		1.40111	2.18436e-08	1.00417e-07		-1.9116	4.40589e-12	1.73332e-11
	P61020	Ras-related protein Rab-5B, Rab5B		1	1	1		6	6	6			P61020	4.89571	2.38961e-13	1.68253e-12		2.02802	5.91586e-09	2.95363e-08		-3.09717	3.67573e-07	7.85287e-07
	P61006	Ras-related protein Rab-8A, Rab8A		1	1	1		6	6	6			P61006	3.25605	8.66757e-10	4.13214e-09		0.0364547	0.999999	1		-3.37049	2.20335e-08	5.59876e-08
	Q15907	Ras-related protein Rab-11B, Rab11B		1	1	1		12	10	12			Q15907	3.41518	3.8171e-21	5.84485e-20		0.743917	1.71836e-06	5.82546e-06		-2.83162	2.42476e-16	1.50643e-15
integral membrane protein	P06756	Integrin alpha-V, ITGAV		1	1	1		12	14	16			P06756	0.35244	0.321815	0.369018		-2.30828	2.05741e-18	3.60616e-17		-2.84179	7.89305e-24	9.28899e-23
	O14672	A disintegrin and metalloproteinase domain-containing protein 10, ADAM10		1	1	1		7	5	7			O14672	1.38987	1.84436e-06	5.22845e-06		-1.97475	6.95114e-12	5.39204e-11		-2.76387	1.8236e-13	8.402e-13
	Q969P0	Immunoglobulin superfamily member 8, IGSF8		1	1	1		10	10	10			Q969P0	1.33305	8.53107e-08	3.02927e-07		-1.70183	9.92214e-15	1.12588e-13		-2.98248	1.05312e-17	7.31502e-17
GPI-anchor	P35052	Glypican-1, GPC1		1	1	1		9	8	9			P35052	1.71571	8.09729e-07	2.44342e-06		-0.210897	0.64019	0.700197		-2.05508	1.49899e-10	4.94343e-10
scaffolding protein	O75955	Flotillin-1, FLOT1		1	1	1		19	17	20			O75955	1.21265	3.51377e-08	1.31903e-07		-1.6519	6.23707e-17	9.34199e-16		-3.20624	2.13475e-25	2.89245e-24
	P11142	Heat shock 70 kDa protein 8, HSPA8		1	1	1		33	32	35			P11142	2.8659	5.74307e-46	5.63231e-44		-1.27994	5.64079e-29	2.15133e-27		-4.08573	8.51369e-66	1.40272e-63

## Sheet: MV marker proteins
													Comparisons proteins found in pelleted vesicle material of S9 cell supernatants
													Additionally, the p.fdr (FalseDiscovery Rate p-value), an adjusted p-value, is listed (significant differences: p.fdr. ≤ 0.05)
MV marker				Presence of the detected proteins in the individual samples (binary)				Number of peptides found from each detected proteins
Category	SwissProt #	Protein Description		90_min_rHla	8h	48h		90_min_rHla	8h	48h			SwissProt #	90_min/8h|signal_log2_ratio	90_min/8h|raw_p_value	90_min/8h|adjusted_p_value		90_min/48h|signal_log2_ratio	90_min/48h|raw_p_value	90_min/48h|adjusted_p_value		8h/48h|signal_log2_ratio	8h/48h|raw_p_value	8h/48h|adjusted_p_value
ribonuclear protein	P31943	Heterogeneous nuclear ribonucleoprotein H, HNRNPH1		1	1	1		10	7	10			P31943	2.47244	1.654e-11	9.58201e-11		-0.863137	0.000786397	0.00153734		-3.15378	1.16417e-16	7.42295e-16
	P14866	Heterogeneous nuclear ribonucleoprotein L, HNRNPl		1	1	1		14	11	15			P14866	2.70498	1.7856e-19	2.32016e-18		-1.08691	2.76855e-13	2.61552e-12		-3.85852	2.36117e-27	3.68396e-26
calcium-binding chaperone	P27797	Calreticulin, CALR		1	1	1		8	9	9			P27797	1.15441	0.00136499	0.00234267		-2.16113	1.6458e-11	1.20839e-10		-2.70782	4.03802e-12	1.59929e-11
nuclear export receptor	P55060	Exportin-2, CSE1L		1	1	1		28	21	29			P55060	2.77362	1.37893e-33	5.25909e-32		-1.49545	2.41771e-27	7.92844e-26		-4.37266	5.76172e-51	4.47784e-49
calcium-dependent phospholipid binding protein	O75131	Copine-3, CPNE3 protein, CPNE3		1	1	1		7	6	7			O75131	0.800592	0.0577	0.0749736		-3.12111	1.46637e-09	8.18427e-09		-3.15375	1.19466e-13	5.61735e-13
mitochondrial outer membrane protein	P21796	Voltage-dependent anion-selective channel protein 1, VDAC1		1	1	1		7	4	8			P21796	1.8625	5.99266e-06	1.56922e-05		-0.768329	0.00146621	0.00269732		-2.68423	1.46421e-13	6.79942e-13
	P45880	Voltage-dependent anion-selective channel protein 2, VDAC2		1	1	1		6	6	6			P45880	2.87998	2.35245e-09	1.04303e-08		0.00111051	1	1		-2.69405	6.36741e-10	1.95727e-09
mitochondrial and nuclear protein	Q99623	Prohibitin-2, PHB2		1	1	1		6	6	8			Q99623	0.893836	0.0536974	0.0702158		-2.83637	3.02131e-13	2.8348e-12		-3.64182	9.013e-13	3.77282e-12
mitochondrial inner membrane protein	P48047	ATP synthase subunit O, mitochondrial, ATP5O		0	0	1		0	0	5			P48047	0.62	0.240645	0.281916		-1.28327	4.70516e-05	0.000120376		-3.72403	1.7191e-05	2.91759e-05
	Q00325	Solute carrier family 25 member 3, SLC25A3		1	1	1		3	4	4			Q00325	2.74799	1.81947e-06	5.17927e-06		-0.0179775	0.999967	1		-2.92711	6.08868e-06	1.10384e-05
	P25705	ATP synthase subunit alpha, mitochondrial, ATP5A1		1	1	1		26	16	24			P25705	7.74915	3.40975e-53	5.40184e-51		3.88903	1.50475e-48	1.93689e-46		-3.36273	7.56771e-28	1.2566e-26
ABC tansporter	P61221	ATP-binding cassette sub-family E member 1, ABCE1		1	1	1		11	6	11			P61221	4.22661	2.66066e-21	4.12001e-20		-0.321918	0.0860737	0.111175		-4.34221	4.80108e-24	5.69903e-23
integral membrane protein	Q07065	Cytoskeleton-associated protein 4, CKAP4		1	1	1		6	12	16			Q07065	1.85163	0.000349265	0.000659616		-1.78828	3.96818e-08	1.74439e-07		-3.50459	1.03694e-19	8.78842e-19
cytoskeleton/microtubule regulation, cell motility	Q9UM54	Unconventional myosin-VI, MYO6		1	1	1		8	6	12			Q9UM54	3.16574	6.91739e-13	4.61794e-12		0.32339	0.689146	0.746606		-4.64394	4.48159e-18	3.23854e-17
	O75369	Filamin-B, FLNB		1	1	1		61	65	80			O75369	2.24098	1.56028e-52	2.3803e-50		-1.31737	8.119e-48	9.83593e-46		-3.38424	3.44015e-116	2.02428e-113
	Q9H0H5	Rac GTPase-activating protein 1, RACGAP1		1	1	1		8	9	12			Q9H0H5	1.07101	0.00378983	0.0060225		-2.78079	4.64184e-12	3.70537e-11		-3.35397	1.81966e-20	1.65822e-19
	Q02241	Kinesin-like protein, KIF23		1	1	1		12	16	19			Q02241	-0.165424	0.989687	1		-3.21528	5.22082e-27	1.6542e-25		-3.54361	9.97315e-28	1.6173e-26
	P06753	Tropomyosin alpha-3 chain, TPM3		1	1	1		6	5	6			P06753	3.3205	2.20756e-08	8.52195e-08		-0.481816	0.148986	0.184674		-3.71349	1.75714e-09	5.10054e-09
cytosolic enzyme	P49588	Alanine--tRNA ligase, cytoplasmic, AARS		1	1	1		24	18	25			P49588	3.11431	2.48475e-28	6.68933e-27		-0.760449	0.93644	0.97404		-3.22727	1.10793e-35	3.48365e-34
	P31939	Bifunctional purine biosynthesis protein, ATIC		1	1	1		21	17	25			P31939	5.32246	1.57039e-28	4.37055e-27		1.85633	2.77645e-07	1.07181e-06		-4.53102	1.39243e-35	4.28016e-34
enzyme, organizer of 3D structure of proteins	Q96HE7	ERO1-like protein alpha, ERO1L		1	1	1		5	5	7			Q96HE7	2.79387	3.92189e-07	1.2513e-06		-1.20792	4.27119e-05	0.00011044		-3.78395	2.57162e-12	1.03543e-11
	P13667	Protein disulfide-isomerase A4, PDIA4		1	1	1		11	15	17			P13667	0.107622	1	1		-2.74773	5.25104e-19	9.74282e-18		-2.16495	1.77691e-18	1.33075e-17
membrane-associated protein, beta-subunit of heterotrimeric protein	P62879	Guanine nucleotide-binding protein G(I)/G(S)/G(T) subunit beta-2, GNB2		1	1	1		7	5	7			P62879	3.38325	2.35729e-11	1.35232e-10		-0.112895	0.875633	0.919616		-3.29844	4.41213e-14	2.15838e-13
